# Supplementary material for: Catalase and Ascorbate Peroxidase in Euglenozoan Protists
Source: PubMed Central journal article supplement (PMC7237987; doi:10.3390/pathogens9040317), 2020-04-24
Supplement: pathogens-09-00317-s001.pdf [file pathogens-09-00317-s001.pdf]

## **Catalase and ascorbate peroxidase in Euglenozoan protists**

Ingrid Škodová-Sveráková<sup>1,2,#,\*</sup>, Kristína Záhonová<sup>1,3,#</sup>, Barbora Bučková<sup>2</sup>, Zoltán Füssy<sup>3</sup>, Vyacheslav Yurchenko<sup>1,4</sup>, Julius Lukeš<sup>1,\*</sup>

<sup>1</sup> Institute of Parasitology, Biology Centre, Czech Academy of Sciences, České Budějovice (Budweis), Czech Republic

<sup>2</sup> Faculty of Natural Sciences, Comenius University, Bratislava, Slovakia

<sup>3</sup> Faculty of Science, Charles University, BIOCEV, Prague, Czech Republic

<sup>4</sup> Life Science Research Centre, Faculty of Science, University of Ostrava, Czech Republic

# Equal contribution

\* Corresponding author: [jula@paru.cas.cz](mailto:jula@paru.cas.cz); [skodovaister@gmail.com](mailto:skodovaister@gmail.com)

**SUPPLEMENTARY FIGURE S1**

**SUPPLEMENTARY TABLES S1 – S2**

**SUPPLEMENTARY FILES S1 – S2**

|                       | 10                                                                                 | 20  | 30  | 40  | 50  | 60  | 70  | 80  |
|-----------------------|------------------------------------------------------------------------------------|-----|-----|-----|-----|-----|-----|-----|
| <i>A. thaliana</i>    | ..... ..... ..... ..... ..... ..... ..... ..... ..... ..... ..... .....            |     |     |     |     |     |     |     |
| <i>G. max</i>         | -----MAERVSLTLNGTLLSPPPTTTTTTMSSSLRSTTAASLLLRSSSSSSSRSTLTLISA                      |     |     |     |     |     |     |     |
| <i>L. major</i>       | -----MFRCACVRLGQ                                                                   |     |     |     |     |     |     |     |
| <i>L. seymouri</i>    | -----MFKCATVRLGQ                                                                   |     |     |     |     |     |     |     |
| <i>C. fasciculata</i> | -----MFKYASVRLGQ                                                                   |     |     |     |     |     |     |     |
| <i>N. esmeraldas</i>  | -----MFRYAAVRLSQ                                                                   |     |     |     |     |     |     |     |
| <i>E. gracilis</i>    | MPAGLYDASLPMMAEHRRPAAAGQWVPLGAAALGALAALAAVALVWQPAPTETALFPRLGHRSRVAATPSTAPRAARAQH   |     |     |     |     |     |     |     |
|                       | 90                                                                                 | 100 | 110 | 120 | 130 | 140 | 150 | 160 |
| <i>A. thaliana</i>    | SSSLSFVRSIVSSPRLSSS--SSLSQKKYRIASVNRSFNSTTAAATKSSSSDPDQLKNA                        |     |     |     |     |     |     |     |
| <i>G. max</i>         | -----MGKSYPTVSADYQKAVEKAKKKLRGFIAEK-RCAPLMLRLA                                     |     |     |     |     |     |     |     |
| <i>L. major</i>       | RVLPSYVPRMSGTSRRAKGLFTGIAV--GTFVSGAMFVSCAS---ARVEEPPFDIRAL                         |     |     |     |     |     |     |     |
| <i>L. seymouri</i>    | RLLPRALPRFSSGARRATGLFAGVAA--GTFVGGAAIIVCAP-GWSRVEEPPFDIRAL                         |     |     |     |     |     |     |     |
| <i>C. fasciculata</i> | RLLPRMAPRFSTGVRRTAALCTGVAA--GAFVGGATFVFCAP-AGAVEEPPFDIRGL                          |     |     |     |     |     |     |     |
| <i>N. esmeraldas</i>  | RVVPRLAPRLSRTPTRAKGLLAGIAV--GTVVSGVTFVSCAT-AKSRTRPEPPFDIAAL                        |     |     |     |     |     |     |     |
| <i>E. gracilis</i>    | PPLPAARLFAAAAPRRDVALHAELPTWVPDFVKGLLEPPQPPYTLAEIRQVPWG--ELRRDLKALVQEK-QCAPILLRLA   |     |     |     |     |     |     |     |
|                       | 170                                                                                | 180 | 190 | 200 | 210 | 220 | 230 | 240 |
| <i>A. thaliana</i>    | WHDAGTYNKNIKEWPRQGGAN-GSLRFDIELKHAANAGLVNALNLIKDIKEKYSGISYADLFQLASATAIEEAGGPKIPM   |     |     |     |     |     |     |     |
| <i>G. max</i>         | WHSAGTYDVSSKT---GGP-FGTIKHPSELAHGANGLDIARVRLLEPLKAEFPILTYADFYQLAGVVAVEVTGGPEVPE    |     |     |     |     |     |     |     |
| <i>L. major</i>       | WHEAASYDCFKKD---GSLNSASMRFKPECLYAGNKGLDIPRKALETLKKYPQISYADLWVLAAYVAIEYMGGPTIPE     |     |     |     |     |     |     |     |
| <i>L. seymouri</i>    | WHEAGSFDCHKKD---GAANSASMRFKPECDYGGNKGLDVPKALEPLKKKYPEISYADLWVLAAYVAIEYMGGQPIPE     |     |     |     |     |     |     |     |
| <i>C. fasciculata</i> | WHEAGSYDCQRKD---GAPNSSMRFKPECEYAGNRGLDVPKALEPLKKKYPEISYADLWVLAAYVAIEYMGGQPIPE      |     |     |     |     |     |     |     |
| <i>N. esmeraldas</i>  | WHEAASYDSTPKKD---GSPNSASMRFKPECMYAGNGLDIPRAALEPLKKKYPQISYADLWVLAAYVAIEYMGGPAIPY    |     |     |     |     |     |     |     |
| <i>E. gracilis</i>    | WHDAGTYDRASGT---GCPRAAMQYPGGEAAHGANAGLDIARNLLQPIREKYPTVSTADLWALASVVAIEVAGGPVPIPE   |     |     |     |     |     |     |     |
|                       | 250                                                                                | 260 | 270 | 280 | 290 | 300 | 310 | 320 |
| <i>A. thaliana</i>    | KYGRVDASGPEDCPEEGRLPDAGPPSPATHLREVFYR-MGLDDKDIVALSGAHTLGRSRPERSGWGKPETKYTKEGPGAP   |     |     |     |     |     |     |     |
| <i>G. max</i>         | HPGREDKPEP---PPEGRLPDATKGS--DHLRDVFGKAMGLSDRDIVALSGGHTIGAAHKERSGFEGPWTNSNPLIFDNSY  |     |     |     |     |     |     |     |
| <i>L. major</i>       | CWGRVDAKDGSVCGPDGRLPDGSKTQ--SHVREVFRR-LGFNDQETVALIGAHTCGECHIEFSGYHGWPWTHDKNGFDNSF  |     |     |     |     |     |     |     |
| <i>L. seymouri</i>    | SWGRVDAKDGSVCGPDGRLPDAAQTQ--MHVRTVFTR-LGFNDQETVALIGAHTCGVCHLEYSGFVGPWTHDANGFDNSF   |     |     |     |     |     |     |     |
| <i>C. fasciculata</i> | SWGRVDAKDGSVCGPDGRLPDGSQTQ--KHVRNVFTR-LGFNDQETVALIGAHTCGVCHLNYSGFVGPWTHDANGFDNSF   |     |     |     |     |     |     |     |
| <i>N. esmeraldas</i>  | SWGRVDAKDGAAACGPDGRLPDGAQTQ--KHVRNVFTR-LGFNDQETVALIGAHTCGECHLKYSGFEGPWTHTDKNGFDNSF |     |     |     |     |     |     |     |
| <i>E. gracilis</i>    | RPGRRDAASAREAVEDGRLPDATRGP--DHLRAVFGR-MGLSDGEIVALSGAHTLGRAHVERSGFEGPWTTEEPLKFDNTE  |     |     |     |     |     |     |     |
|                       | 330                                                                                | 340 | 350 | 360 | 370 | 380 | 390 | 400 |
| <i>A. thaliana</i>    | GGQSWTPEWLKFDNSYFKEIKEKREDLLVLPTDAAFEDSSFVKVYAEKYAADQDAFFKDYAVAHAKLSNLGAEFNPPEG    |     |     |     |     |     |     |     |
| <i>G. max</i>         | FKELLSGE-----KEGLLQLPSDKALLSDPVFRPLVEKYASDEDAFFADYAEAHQKLSLGFSAEA----              |     |     |     |     |     |     |     |
| <i>L. major</i>       | FTQLLDEDVWLNPKVEQMQLMDRATTKLMLLPSDVCLLDPSYRKYVELYAKDNDRFNKDFANAFKKLTELGTNRNLHKAP   |     |     |     |     |     |     |     |
| <i>L. seymouri</i>    | FTALLDEEWEVNPKEVKMMQMDRRTTKRLMLLPSDIALIILDPKYLKYVEMYAKDNDRFNNSDFAKAFKKLTELGTNLRHAP |     |     |     |     |     |     |     |
| <i>C. fasciculata</i> | FTALLDEEWEVNPVNEVQMMDRATTKLMLLPSDMALIILDPKYKYYVEMYAKDNDRFNNSDFSKAFKKLTELGTNLRHAP   |     |     |     |     |     |     |     |
| <i>N. esmeraldas</i>  | FTELLEDVWVNGKIQQMQMDRATTKLMLLPSDMCLILDPKYRYYVELYAKDNDRFNNSDFSKAFKKLTELGTNLRHAP     |     |     |     |     |     |     |     |
| <i>E. gracilis</i>    | FTNLLNKKWTLGTSSAGKQYTDGTGLMLLPSDMALLEDPPIFRSYMEKYAKDEVAAYFRDFATAYQRLAELGVPEL-PVP   |     |     |     |     |     |     |     |
|                       | 410                                                                                | 420 | 430 | 440 | 450 | 460 | 470 | 480 |
| <i>A. thaliana</i>    | IVI-----                                                                           |     |     |     |     |     |     |     |
| <i>G. max</i>         | -----                                                                              |     |     |     |     |     |     |     |
| <i>L. major</i>       | ASES-----                                                                          |     |     |     |     |     |     |     |
| <i>L. seymouri</i>    | MPESA-----                                                                         |     |     |     |     |     |     |     |
| <i>C. fasciculata</i> | MPEEA-----                                                                         |     |     |     |     |     |     |     |
| <i>N. esmeraldas</i>  | AAES-----                                                                          |     |     |     |     |     |     |     |
| <i>E. gracilis</i>    | WDEIRADVAALVAEKGCAPILIRLAWHDAGTYDQQSNTGCPRAVMRFPGEAEHGSNGLDIARGLLQPIVDKYSWVSTA     |     |     |     |     |     |     |     |
|                       | 490                                                                                | 500 | 510 | 520 | 530 | 540 | 550 | 560 |
| <i>A. thaliana</i>    | -----                                                                              |     |     |     |     |     |     |     |
| <i>G. max</i>         | -----                                                                              |     |     |     |     |     |     |     |
| <i>L. major</i>       | -----                                                                              |     |     |     |     |     |     |     |
| <i>L. seymouri</i>    | -----                                                                              |     |     |     |     |     |     |     |
| <i>C. fasciculata</i> | -----                                                                              |     |     |     |     |     |     |     |
| <i>N. esmeraldas</i>  | -----                                                                              |     |     |     |     |     |     |     |
| <i>E. gracilis</i>    | DLWAFASVVATEVSGGPKIPFRPGRRAVTAKEAVERGRLPDATQTTNHLRDVFYRMGMTDEEIVALSAGAHTMGRCHAE    |     |     |     |     |     |     |     |

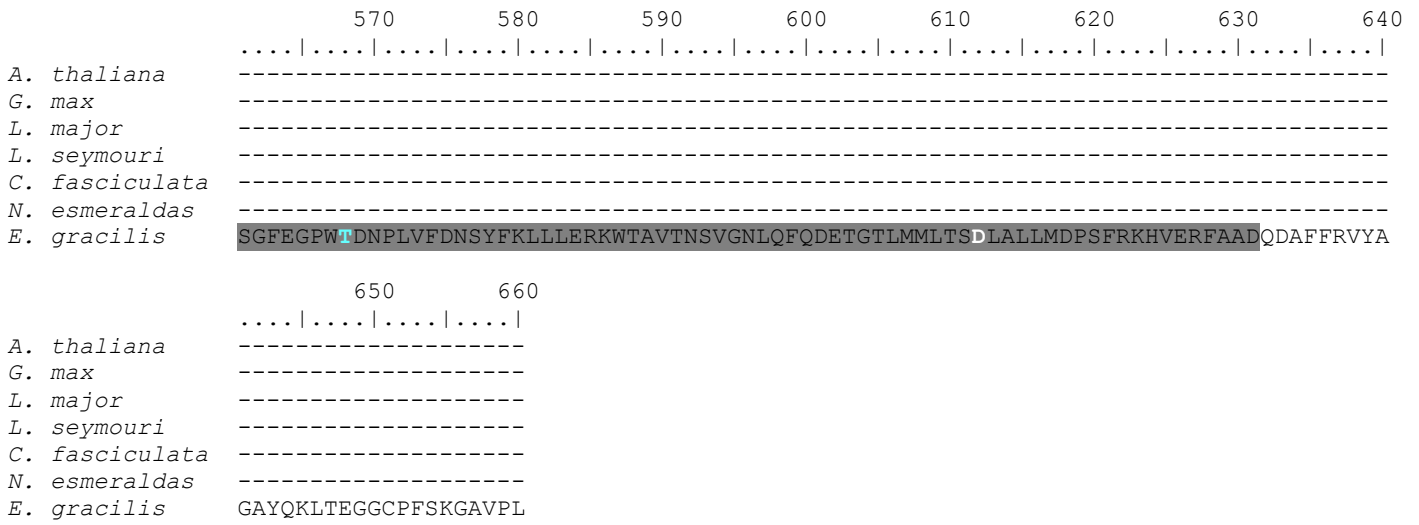

**Figure S1:** Full alignment of APX sequences from selected species. APX domains, signal and transit peptide, and linker are boxed by a colored background corresponding to domain colors in Fig. 4. Important amino acid residues are highlighted in different colors corresponding to colors in Fig. 4. Transmembrane domains are underlined.

**Table S1.** Predicted subcellular localization of euglenozoan sequences used in this study.

| protein         | organism                     | sequence                    | peroxisomal prediction        | NommPred | TargetP     | MultiLoc2 fungal | MultiLoc2 animal | PrediSI | No. TMDs | INFERRED       |
|-----------------|------------------------------|-----------------------------|-------------------------------|----------|-------------|------------------|------------------|---------|----------|----------------|
| mitCCP          | <i>Diplonema papillatum</i>  | TR110952_c20_g26_i1_m.25215 | -                             | -        | mTP (36-37) | M: 0.62          | S: 0.94          | S (24)  | 0        | M              |
| eHPX            | <i>Diplonema papillatum</i>  | TR8739_c0_g1_i1_m.830       | PTS1: SKL                     | M        | mTP         | S: 0.46          | M: 0.41          | -       | 0        | M/G            |
| eHPX            | <i>Diplonema papillatum</i>  | TR45711_c0_g1_i1_m.5672     | -                             | M        | SP (16-17)  | S: 0.98          | C: 0.46          | S (16)  | 0        | truncated N&C  |
| eHPX            | <i>Diplonema papillatum</i>  | TR130880_c10_g1_i1_m.31721  | -                             | -        | SP (19-20)  | S: 0.98          | S: 0.9           | S (17)  | 1        | S              |
| mitCCP          | <i>Diplonema japonicum</i>   | TRINITY_DN10300_c4_g1_i2    | -                             | -        | mTP (32-33) | M: 0.74          | M: 0.87          | -       | 0        | M              |
| mitCCP          | <i>Diplonema japonicum</i>   | TRINITY_DN10460_c6_g1_i1    | PTS2: MSVSNRLKVLNSHV          | -        | noTP        | S: 0.68          | C: 0.67          | -       | 1        | C              |
| eHPX            | <i>Diplonema japonicum</i>   | TRINITY_DN10282_c5_g3_i2    | -                             | M        | mTP (23-24) | M: 0.72          | M: 0.75          | -       | 1        | M              |
| eHPX            | <i>Diplonema japonicum</i>   | TRINITY_DN8646_c0_g2_i1     | -                             | -        | SP (16-17)  | S: 0.99          | S: 0.89          | S (16)  | 0        | S              |
| eHPX            | <i>Diplonema japonicum</i>   | TRINITY_DN10642_c2_g3_i1    | -                             | -        | SP (21-22)  | S: 0.89          | S: 0.84          | S (21)  | 0        | S; truncated C |
| eHPX            | <i>Diplonema japonicum</i>   | TRINITY_DN8053_c0_g1_i1     | PTS1: SRI                     | -        | noTP        | S: 0.52          | N: 0.43          | -       | 1        | truncated N    |
| eHPX            | <i>Rhynchopus humris</i>     | TRINITY_DN40212_c0_g1_i1    | -                             | -        | mTP (34-35) | M: 0.65          | M: 0.81          | -       | 1        | M              |
| eHPX            | <i>Rhynchopus humris</i>     | TRINITY_DN23907_c1_g1_i1    | -                             | -        | SP (44-45)  | S: 0.45          | S: 0.4           | S (44)  | 1        | S; truncated C |
| eHPX            | <i>Rhynchopus humris</i>     | TRINITY_DN57024_c0_g1_i1    | -                             | -        | noTP        | S: 0.89          | S: 0.66          | S (50)  | 1        | S; truncated C |
| eHPX            | <i>Rhynchopus humris</i>     | TRINITY_DN63548_c0_g1_i1    | -                             | -        | noTP        | S: 0.9           | S: 0.83          | -       | 0        | truncated N&C  |
| mitCCP          | <i>Lacrimia lanifica</i>     | TRINITY_DN7350_c0_g1_i1     | -                             | -        | mTP (26-27) | M: 0.71          | M: 0.95          | -       | 0        | M              |
| eHPX            | <i>Lacrimia lanifica</i>     | TRINITY_DN4895_c0_g1_i1     | -                             | -        | noTP        | M: 0.56          | M: 0.83          | -       | 1        | M              |
| eHPX            | <i>Lacrimia lanifica</i>     | TRINITY_DN11643_c1_g8_i2    | -                             | -        | SP (19-20)  | S: 0.99          | S: 0.99          | S (21)  | 1        | S              |
| eHPX            | <i>Lacrimia lanifica</i>     | TRINITY_DN11235_c0_g1_i6    | -                             | -        | SP (23-24)  | S: 1.0           | S: 0.99          | S (23)  | 0        | S; truncated C |
| eHPX            | <i>Lacrimia lanifica</i>     | TRINITY_DN11361_c1_g9_i2    | -                             | -        | SP (22-23)  | S: 0.97          | S: 0.72          | S (22)  | 0        | S; truncated C |
| eHPX            | <i>Lacrimia lanifica</i>     | TRINITY_DN8638_c0_g1_i1     | -                             | -        | noTP        | S: 0.65          | C: 0.57          | -       | 1        | truncated N    |
| k-hAPX-CCP      | <i>Lacrimia lanifica</i>     | TRINITY_DN11414_c4_g13_i1   | PTS2: MERLHVLTHTL             | -        | noTP        | C: 0.64          | C: 0.45          | -       | 0        | G              |
| mitCCP          | <i>Sulcionema specki</i>     | TRINITY_DN80007_c0_g1_i1    | -                             | -        | mTP (36-37) | M: 0.59          | M: 0.9           | -       | 0        | M              |
| eHPX            | <i>Sulcionema specki</i>     | TRINITY_DN10012_c0_g1_i1    | -                             | M        | noTP        | M: 0.39          | M: 0.61          | -       | 1        | M              |
| eHPX            | <i>Sulcionema specki</i>     | TRINITY_DN49103_c1_g2_i3    | -                             | -        | mTP (32-33) | M: 0.64          | M: 0.89          | -       | 0        | M; truncated C |
| eHPX            | <i>Sulcionema specki</i>     | TRINITY_DN77967_c0_g1_i1    | -                             | M        | mTP (24-25) | M: 0.64          | M: 0.95          | -       | 0        | M              |
| eHPX            | <i>Sulcionema specki</i>     | TRINITY_DN50008_c0_g1_i1    | -                             | -        | SP (16-17)  | S: 0.99          | S: 0.81          | S (16)  | 0        | S              |
| eHPX            | <i>Sulcionema specki</i>     | TRINITY_DN70017_c0_g1_i1    | -                             | -        | SP (17-18)  | S: 0.97          | S: 0.95          | S (17)  | 0        | S; truncated C |
| eHPX            | <i>Sulcionema specki</i>     | TRINITY_DN23548_c0_g1_i2    | -                             | -        | noTP        | M: 0.58          | C: 0.47          | -       | 0        | truncated N    |
| pt/cytAPX-LGT   | <i>Sulcionema specki</i>     | TRINITY_DN24282_c1_g1_i1    | PTS2: MEARRLDVLRSHI           | -        | noTP        | C: 0.72          | C: 0.44          | -       | 0        | G              |
| mitCCP          | <i>Artemidia motanka</i>     | TRINITY_DN15980_c4_g3_i1    | -                             | -        | mTP (37-38) | M: 0.91          | M: 0.92          | S (22)  | 0        | M              |
| eHPX            | <i>Artemidia motanka</i>     | TRINITY_DN6375_c0_g1_i2     | -                             | M        | mTP (27-28) | M: 0.87          | M: 0.92          | -       | 0        | M; truncated C |
| eHPX            | <i>Artemidia motanka</i>     | TRINITY_DN14823_c0_g2_i1    | -                             | M        | mTP (26-27) | M: 0.83          | M: 0.82          | -       | 1        | M              |
| eHPX            | <i>Artemidia motanka</i>     | TRINITY_DN24471_c0_g1_i1    | -                             | M        | mTP (24-25) | M: 0.73          | M: 0.89          | -       | 1        | M              |
| pt/cytAPX-LGT   | <i>Artemidia motanka</i>     | TRINITY_DN15980_c4_g5_i1    | PTS2: MHR LAVVSSHL            | -        | noTP        | C: 0.66          | C: 0.49          | -       | 0        | G              |
| pt-hAPX-CCP-LGT | <i>Artemidia motanka</i>     | TRINITY_DN17334_c8_g3_i1    | -                             | -        | noTP        | C: 0.63          | C: 0.65          | -       | 0        | C              |
| mitCCP          | <i>Namystynia karyoxenos</i> | TRINITY_DN77678_c0_g1_i1    | -                             | -        | mTP (27-28) | M: 0.77          | M: 0.98          | -       | 0        | M              |
| eHPX            | <i>Namystynia karyoxenos</i> | TRINITY_DN89651_c0_g1_i1    | PTS2: MPPAVIAAQLLLPGRLLLRARRV | M        | noTP        | M: 0.58          | M: 0.54          | -       | 1        | M/G            |
| eHPX            | <i>Namystynia karyoxenos</i> | TRINITY_DN15097_c0_g1_i1    | -                             | -        | noTP        | M: 0.76          | M: 0.92          | S (44)  | 1        | M              |
| eHPX            | <i>Namystynia karyoxenos</i> | TRINITY_DN52435_c0_g1_i1    | -                             | M        | mTP (33-34) | M: 0.71          | M: 0.86          | -       | 1        | M              |
| eHPX            | <i>Namystynia karyoxenos</i> | TRINITY_DN26871_c0_g1_i1    | -                             | -        | SP (28-29)  | S: 0.99          | M: 0.86          | S (28)  | 0        | S              |
| pt/cytAPX-LGT   | <i>Namystynia karyoxenos</i> | TRINITY_DN89136_c0_g1_i1    | PTS2: MAARRIDVLSHV            | -        | noTP        | M: 0.37          | C: 0.47          | -       | 0        | G              |

|                 |                                               |                                               |                                    |   |             |         |         |        |   |                |
|-----------------|-----------------------------------------------|-----------------------------------------------|------------------------------------|---|-------------|---------|---------|--------|---|----------------|
| pt-hAPX-CCP-LGT | <i>Namystynia karyoxenos</i>                  | TRINITY_DN22390_c0_g1_i1                      | -                                  | - | noTP        | C: 0.7  | N: 0.64 | -      | 0 | C              |
| pt-hAPX-CCP     | <i>Euglena gracilis</i>                       | GEFR01005776.1/BAC05484                       | -                                  | - | noTP        | S: 0.37 | M: 0.81 | S (43) | 1 | P              |
| g-ptAPX         | <i>Euglena gracilis</i>                       | GDJR01039455.1                                | -                                  | - | noTP        | S: 0.45 | M: 0.63 | S (49) | 2 | truncated N    |
| eHPX            | <i>Euglena gracilis</i>                       | GDJR01082147.1                                | -                                  | - | noTP        | S: 0.92 | C: 0.6  | -      | 0 | truncated N&C  |
| eHPX            | <i>Euglena gracilis</i>                       | GDJR01082152.1                                | -                                  | - | noTP        | S: 0.9  | C: 0.74 | -      | 0 | truncated N&C  |
| eHPX            | <i>Euglena gracilis</i>                       | GEFR01009177.1 (C-terminal of GDJR01082147.1) | -                                  | - | noTP        | S: 0.83 | C: 0.67 | -      | 0 | truncated N&C  |
| eHPX            | <i>Euglena gracilis</i>                       | GEFR01013723.1                                | -                                  | - | noTP        | S: 0.97 | C: 0.71 | -      | 0 | truncated N&C  |
| eHPX            | <i>Euglena gracilis</i>                       | GEFR01042768.1                                | -                                  | - | noTP        | S: 0.94 | S: 0.7  | -      | 0 | truncated N&C  |
| eHPX            | <i>Euglena longa</i>                          | GGOE01045416.1 (Contig45548)                  | -                                  | - | SP (19-20)  | S: 0.99 | S: 0.95 | S (19) | 0 | S; truncated C |
| pt-hAPX-CCP     | <i>Eutreptiella gymnastica</i> NIES-381       | CAMNT_0000682101                              | -                                  | - | noTP        | S: 0.54 | C: 0.74 | -      | 0 | truncated N    |
| pt-hAPX-CCP     | <i>Eutreptiella gymnastica</i> NIES-381       | CAMNT_0000688179                              | PTS1: NKA                          | - | noTP        | S: 0.75 | M: 0.37 | S (44) | 1 | P              |
| pt-hAPX-CCP     | <i>Eutreptiella gymnastica</i> NIES-381       | CAMNT_0000690323                              | -                                  | - | noTP        | S: 0.47 | C: 0.52 | S (42) | 1 | P              |
| pt-hAPX-CCP     | <i>Eutreptiella gymnastica</i> NIES-381       | CAMNT_0000693181                              | -                                  | - | noTP        | C: 0.51 | C: 0.45 | S (40) | 1 | P              |
| pt-hAPX-CCP     | <i>Eutreptiella gymnastica</i> NIES-381       | CAMNT_0000708097                              | -                                  | - | noTP        | S: 0.47 | C: 0.52 | S (42) | 1 | P              |
| g-ptAPX         | <i>Eutreptiella gymnastica</i> NIES-381       | Transcript_62771                              | -                                  | - | noTP        | C: 0.44 | C: 0.39 | S (50) | 0 | truncated N    |
| g-ptAPX         | <i>Eutreptiella gymnastica</i> NIES-381       | Transcript_108943                             | -                                  | - | SP (28-29)  | M: 0.57 | S: 0.95 | S (31) | 3 | P; truncated C |
| g-ptAPX         | <i>Eutreptiella gymnastica</i> NIES-381       | MMETSP0039_2-20120614_21586                   | -                                  | - | noTP        | M: 0.59 | M: 0.62 | S (35) | 3 | P              |
| pt-hAPX-CCP     | <i>Eutreptiella gymnastica</i> -like CCMP1594 | CAMNT_0046500393                              | -                                  | - | noTP        | S: 0.59 | M: 0.68 | S (48) | 1 | P              |
| pt-hAPX-CCP     | <i>Eutreptiella gymnastica</i> -like CCMP1594 | CAMNT_0046515501                              | -                                  | - | noTP        | S: 0.52 | M: 0.63 | S (41) | 1 | P              |
| g-ptAPX         | <i>Eutreptiella gymnastica</i> -like CCMP1594 | MMETSP0809_Transcript_4877                    | -                                  | - | noTP        | M: 0.47 | S: 0.59 | S (40) | 2 | P              |
| g-ptAPX         | <i>Eutreptiella gymnastica</i> -like CCMP1594 | MMETSP0811_Transcript_101747                  | -                                  | - | noTP        | S: 0.57 | S: 0.55 | S (33) | 2 | P              |
| hAPX-CCP        | <i>Blechnomonas ayalai</i>                    | Baya_117_0180                                 | -                                  | M | mTP (26-27) | M: 0.53 | M: 0.86 | -      | 1 | M              |
| hAPX-CCP        | <i>Crithidia fasciculata</i>                  | CFAC1_290028200.1                             | -                                  | M | mTP (49-50) | C: 0.44 | M: 0.95 | S (43) | 0 | M              |
| hAPX-CCP        | <i>Crithidia thermophila</i>                  | c6407_g1_i1                                   | -                                  | M | mTP (28-29) | C: 0.48 | M: 0.92 | -      | 1 | M              |
| hAPX-CCP        | <i>Endotrypanum monterogeii</i>               | EMOLV88_340006000.1                           | -                                  | M | mTP (49-50) | M: 0.36 | M: 0.81 | S (52) | 0 | M              |
| hAPX-CCP        | <i>Leishmania enriettii</i>                   | LENLEM3045_340005600.1                        | -                                  | M | mTP (52-53) | M: 0.39 | M: 0.88 | S (52) | 1 | M              |
| hAPX-CCP        | <i>Leishmania major</i> Friedlin              | Lmjf.34.0070                                  | -                                  | M | mTP (46-47) | C: 0.41 | M: 0.87 | S (52) | 1 | M              |
| hAPX-CCP        | <i>Leishmania mexicana</i>                    | LmxM.33.0070.1                                | -                                  | - | SP (32-33)  | M: 0.45 | M: 0.73 | S (32) | 1 | M              |
| hAPX-CCP        | <i>Leishmania</i> sp. MAR LEM2494             | LMARLEM2494_340005600.1                       | -                                  | M | SP (35-36)  | M: 0.44 | C: 0.4  | S (35) | 1 | M              |
| hAPX-CCP        | <i>Leptomonas pyrrochoris</i>                 | LpyrH10_05_0250                               | -                                  | M | mTP (21-22) | M: 0.5  | M: 0.9  | S (43) | 1 | M              |
| hAPX-CCP        | <i>Leptomonas seymouri</i>                    | Lsey_0078_0210                                | -                                  | M | mTP (27-28) | C: 0.41 | M: 0.96 | S (45) | 1 | M              |
| hAPX-CCP        | <i>Novymonas esmeraldas</i>                   | NODE_82                                       | PTS2: MFRYAAVRLSQRVVPRLAPRLSRTPTRA | - | mTP (52-53) | M: 0.51 | M: 0.88 | S (52) | 1 | M              |
| hAPX-CCP        | <i>Paratrypanosoma confusum</i>               | PCON_0074310.mRNA                             | -                                  | - | noTP        | C: 0.6  | C: 0.54 | -      | 0 | truncated N    |
| hAPX-CCP        | <i>Strigomonas culicis</i>                    | EPY37063.1                                    | -                                  | M | mTP (28-29) | M: 0.48 | M: 0.88 | -      | 0 | M              |
| hAPX-CCP        | <i>Trypanosoma cruzi</i> Dm28c 2018           | C4B63_47g23-t42_1                             | -                                  | M | noTP        | C: 0.56 | M: 0.61 | S (50) | 0 | M              |
| hAPX-CCP        | <i>Trypanosoma cruzi</i> marinkellei          | Tc_MARK_3376                                  | PTS2: MFFRLGSFFSKY                 | M | mTP (12-13) | C: 0.56 | M: 0.67 | -      | 1 | M              |
| hAPX-CCP        | <i>Trypanosoma grayi</i>                      | DQ04_02591010-t26_1                           | -                                  | M | mTP (51-52) | M: 0.49 | M: 0.8  | S (47) | 0 | M              |
| hAPX-CCP        | <i>Trypanosoma theileri</i>                   | TM35_000011050-t36_1                          | -                                  | M | mTP (34-35) | C: 0.56 | M: 0.88 | S (45) | 1 | M              |
| CAT             | <i>Diplonema papillatum</i>                   | DIPPA_00897.mRNA.1                            | -                                  | - | noTP        | C: 0.88 | C: 0.77 | -      | 0 | C              |
| CAT             | <i>Diplonema papillatum</i>                   | DIPPA_00900.mRNA.1                            | -                                  | - | noTP        | C: 0.88 | C: 0.77 | -      | 0 | C              |
| CAT             | <i>Diplonema papillatum</i>                   | DIPPA_00901.mRNA.1                            | -                                  | - | noTP        | C: 0.88 | C: 0.77 | -      | 0 | C              |
| CAT             | <i>Diplonema papillatum</i>                   | DIPPA_00904.mRNA.1                            | -                                  | - | noTP        | C: 0.8  | C: 0.67 | -      | 0 | C              |
| CAT             | <i>Diplonema japonicum</i>                    | TRINITY_DN11173_c4_g2_i1                      | PTS1: SQA                          | - | SP (20-21)  | S: 0.93 | S: 0.94 | S (16) | 0 | S              |
| CAT             | <i>Diplonema japonicum</i>                    | TRINITY_DN11173_c4_g3_i1                      | PTS1: SQA                          | - | SP (16-17)  | S: 0.89 | S: 0.92 | S (16) | 0 | S              |
| CAT             | <i>Diplonema japonicum</i>                    | TRINITY_DN11173_c4_g3_i2                      | PTS1: SQA                          | - | SP (16-17)  | S: 0.91 | S: 0.92 | S (16) | 0 | S              |

|     |                                  |                                   |   |   |            |         |         |        |   |                |
|-----|----------------------------------|-----------------------------------|---|---|------------|---------|---------|--------|---|----------------|
| CAT | <i>Rhynchopus humris</i>         | TRINITY_DN23544_c0_g1_i1          | - | - | SP (19-20) | S: 0.91 | S: 0.9  | S (19) | 0 | S              |
| CAT | <i>Sulcionema specki</i>         | TRINITY_DN284_c0_g1_i1            | - | - | SP (17-18) | S: 0.92 | S: 0.94 | S (17) | 0 | S              |
| CAT | <i>Artemidia motanka</i>         | TRINITY_DN17294_c8_g2_i1          | - | - | SP (18-19) | S: 0.94 | S: 0.92 | S (18) | 0 | S              |
| CAT | <i>Artemidia motanka</i>         | TRINITY_DN17294_c8_g5_i1          | - | - | SP (23-24) | S: 0.93 | S: 0.95 | S (16) | 0 | S              |
| CAT | <i>Artemidia motanka</i>         | TRINITY_DN17294_c8_g7_i1          | - | - | SP (16-17) | S: 0.89 | S: 0.86 | S (16) | 0 | S              |
| CAT | <i>Namystynia karyoxenos</i>     | TRINITY_DN46753_c0_g1_i1          | - | - | SP (19-20) | S: 0.91 | S: 0.84 | S (19) | 0 | S; truncated C |
| CAT | <i>Namystynia karyoxenos</i>     | TRINITY_DN46753_c0_g1_i2          | - | - | SP (19-20) | S: 0.9  | S: 0.87 | S (19) | 0 | S              |
| CAT | <i>Namystynia karyoxenos</i>     | TRINITY_DN46753_c0_g1_i3          | - | - | SP (19-20) | S: 0.91 | S: 0.9  | S (19) | 0 | S              |
| CAT | <i>Namystynia karyoxenos</i>     | TRINITY_DN46753_c0_g1_i4          | - | - | SP (19-20) | S: 0.91 | S: 0.86 | S (19) | 0 | S; truncated C |
| CAT | <i>Namystynia karyoxenos</i>     | TRINITY_DN57307_c0_g1_i1          | - | M | SP (17-18) | S: 0.96 | C: 0.49 | S (17) | 0 | S              |
| CAT | <i>Novymonas esmeraldas</i>      | ANJ89233                          | - | - | noTP       | C: 0.91 | C: 0.8  | -      | 0 | C              |
| CAT | <i>Blastocrithidia</i> sp. P57   | TRINITY_GG_3943_c1_g1_i1          | - | - | noTP       | C: 0.9  | C: 0.79 | -      | 0 | C              |
| CAT | <i>Blastocrithidia triatomae</i> | NODE_379_length_14747_cov_61.7013 | - | - | noTP       | C: 0.89 | C: 0.79 | -      | 0 | C              |
| CAT | <i>jaculum</i>                   | NODE_189_length_21547_cov_70.3833 | - | - | SP (19-20) | M: 0.4  | S: 0.47 | S (19) | 2 | S              |
| CAT | <i>Crithidia acanthocephali</i>  | caca                              | - | - | noTP       | C: 0.74 | C: 0.67 | -      | 0 | C              |
| CAT | <i>Crithidia bombi</i>           | cbom                              | - | - | noTP       | C: 0.91 | C: 0.79 | -      | 0 | C              |
| CAT | <i>Crithidia brevicula</i>       | ANJ89235                          | - | - | noTP       | C: 0.92 | C: 0.82 | -      | 0 | truncated N&C  |
| CAT | <i>Crithidia fasciculata</i>     | CFAC1_160031400                   | - | - | noTP       | C: 0.9  | C: 0.79 | -      | 0 | C              |
| CAT | <i>Crithidia mellificae</i>      | cmel                              | - | - | noTP       | C: 0.79 | C: 0.78 | -      | 0 | C              |
| CAT | <i>Crithidia thermophila</i>     | ANJ89234                          | - | - | noTP       | C: 0.87 | C: 0.79 | -      | 0 | C              |
| CAT | <i>Leptomonas pyrrocoris</i>     | XP_015656182                      | - | - | noTP       | C: 0.9  | C: 0.79 | -      | 0 | C              |
| CAT | <i>Leptomonas seymouri</i>       | KPI89353                          | - | - | noTP       | C: 0.9  | C: 0.79 | -      | 0 | C              |
| CAT | <i>Lotmaria passim</i>           | lpas                              | - | - | noTP       | C: 0.9  | C: 0.81 | -      | 0 | C              |

mitCCP, mitochondrial CCP

eHPX, euglenozoa specific heme peroxidase

k-hAPX-CCP, kinetoplastid specific hybrid APX-CCP

pt-hAPX-CCP, plastid hybrid APX-CCP

pt-hAPX-CCP-LGT, plastid hybrid APX-CCP, gained by LGT

pt/cytAPX-LGT, plastid/cytosolic APX, gained by LGT

g-ptAPX, green lineage specific plastid APX

CAT, catalase

M, mitochondrion

P, plastid

G, glycosome

S, secretory pathway

C, cytosol

N, nucleus

truncated N, truncated sequence at N-terminus

truncated C, truncated sequence at C-terminus

truncated N&C, truncated sequence at both termini

**Table S2.** Inferred expression levels and measurements of enzyme activities and oxygen uptake in studied euglenozoans.

| lineage              | species                        | condition | CATALALASE                        |         |         |          |                               | ASCORBATE PEROXIDASE        |        |        |                 |                  | RESPIRATION                         |
|----------------------|--------------------------------|-----------|-----------------------------------|---------|---------|----------|-------------------------------|-----------------------------|--------|--------|-----------------|------------------|-------------------------------------|
|                      |                                |           | contig                            | FPKM    | TPM     | TPM mean | activity [U/mg]               | contig                      | FPKM   | TPM    | TPM mean        | activity [mU/mg] | [O2 μmol/min*10 <sup>6</sup> cells] |
| Diplonemids          | <i>Diplonema papillatum</i>    | rich      | DIPPA_00897.mRNA.1                | 80.87   | 112.16  | 216.21   | 3.99 ± 1.48                   | n.a.                        | n.a.   | n.a.   | n.a.            | 0                | 2.42 ± 0.98                         |
|                      |                                | medium    | DIPPA_00900.mRNA.1                | 459.22  | 636.89  |          |                               |                             |        |        |                 |                  |                                     |
|                      |                                |           | DIPPA_00901.mRNA.1                | 56.43   | 78.26   |          |                               |                             |        |        |                 |                  |                                     |
|                      |                                |           | DIPPA_00904.mRNA.1                | 27.06   | 37.52   |          |                               |                             |        |        |                 |                  |                                     |
|                      |                                | poor      | DIPPA_00897.mRNA.1                | 92.55   | 131.25  | 256.86   | 6.27 ± 3.47                   | n.a.                        | n.a.   | n.a.   | n.a.            | 0                | 7.83 ± 2.81                         |
|                      |                                | medium    | DIPPA_00900.mRNA.1                | 505.04  | 716.26  |          |                               |                             |        |        |                 |                  |                                     |
|                      |                                |           | DIPPA_00901.mRNA.1                | 107.16  | 151.97  |          |                               |                             |        |        |                 |                  |                                     |
|                      | <i>Rhynchopus humris</i>       |           | DIPPA_00904.mRNA.1                | 19.72   | 27.97   |          |                               |                             |        |        |                 |                  |                                     |
|                      |                                |           | TRINITY_DN23544_c0_g1_i1          | 30.45   | 25.39   | 25.39    | 0                             | n.a.                        | n.a.   | n.a.   | n.a.            | 3.69 ± 1.80      | 15.42 ± 6.09                        |
| Kinetoplastids       | <i>Blastocrithidia</i> sp. P57 |           | TRINITY_GG_3943_c1_g1_i1          | 21.04   | 26.93   | 26.93    | 0                             | n.a.                        | n.a.   | n.a.   | n.a.            | 2.06 ± 1.84      | 2.44 ± 0.67                         |
|                      | <i>Leptomonas seymouri</i>     | 14 °C     | Lsey_0026_0490                    | 1117.21 | 813.49  | 813.49   | 16.84 ± 1.94                  | Lsey_0078_0210              | 225.21 | 163.98 | 163.98          | 54.26 ± 21.32    | 5.84 ± 0.90                         |
|                      |                                | 23 °C     | Lsey_0026_0490                    | 106.45  | 116.80  | 116.80   | 12.90 ± 6.48                  | Lsey_0078_0210              | 15.23  | 16.71  | 16.71           | 39.79 ± 10.96    | 8.93 ± 0.52                         |
|                      |                                | 34 °C     | Lsey_0026_0490                    | 398.47  | 432.93  | 432.93   | 5.07 ± 3.81                   | Lsey_0078_0210              | 38.24  | 41.55  | 41.55           | 34.35 ± 7.93     | 7.86 ± 0.61                         |
|                      | <i>Crithidia thermophila</i>   | 14 °C     | TR9337 c1_g1_i1/ANJ89234          | 384.23  | 567.61  | 567.61   | 17.19 ± 6.06                  | TR7333 c1_g1_i1/c6407_g1_i1 | 122.50 | 180.96 | 180.96          | 65.40 ± 28.87    | 6.21 ± 0.16                         |
|                      |                                | 23 °C     | TR9337 c1_g1_i1/ANJ89234          | 457.21  | 678.91  | 678.91   | 13.19 ± 2.43                  | TR7333 c1_g1_i1/c6407_g1_i1 | 12.14  | 18.03  | 18.03           | 48.63 ± 19.51    | 10.92 ± 3.15                        |
|                      |                                | 34 °C     | TR9337 c1_g1_i1/ANJ89234          | 646.46  | 972.86  | 972.86   | 4.79 ± 1.11                   | TR7333 c1_g1_i1/c6407_g1_i1 | 18.42  | 27.72  | 27.72           | 51.57 ± 27.44    | 11.82 ± 1.16                        |
|                      | <i>Novymonas esmeraldas</i>    |           | TRINITY_GG_6749_c0_g1_i1/ANJ89233 | 927.28  | 1220.49 | 626.23   | 10.76 ± 2.43                  | NODE_82                     | 56.08  | 73.81  | 73.81           | 206.63 ± 69.37   | 4.78 ± 0.20                         |
|                      |                                |           | TRINITY_GG_6749_c0_g1_i2/ANJ89233 | 24.30   | 31.97   |          |                               |                             |        |        |                 |                  |                                     |
|                      | <i>Trypanosoma brucei</i>      |           | n.a.                              | n.a.    | n.a.    | n.a.     | 0                             | n.a.                        | n.a.   | n.a.   | n.a.            | 0                | 2.95 ± 0.67                         |
| Euglenids            | <i>Euglena gracilis</i>        | light     | n.a.                              | n.a.    | n.a.    | 0        | GEFR01005776.1/BAC05484       | 12.51                       | 13.79  | 12.00  | 625.22 ± 176.36 | 2.37 ± 1.22      |                                     |
|                      |                                | dark      | n.a.                              | n.a.    | n.a.    | 0        | GEFR01016514.1/GDJR01039455.1 | 9.18                        | 10.12  |        |                 |                  |                                     |
|                      |                                |           |                                   |         |         | 0        | GEFR01005776.1/BAC05484       | 9.27                        | 9.87   | 8.30   | 0               | 15.81 ± 4.42     |                                     |
|                      |                                |           |                                   |         |         | 0        | GEFR01016514.1/GDJR01039455.1 | 6.55                        | 6.79   |        |                 |                  |                                     |
| <i>Euglena longa</i> |                                | n.a.      | n.a.                              | n.a.    | 0       | n.a.     | n.a.                          | n.a.                        | n.a.   | 0      | 23.65 ± 3.69    |                  |                                     |

n.a.; not available

**File S1:** Maximum-likelihood phylogenetic tree of Euglenozoa HPX possessing APX domains in Newick format.

(Acanthoeca\_MMETSP0105\_Gene.63460-  
Transcript\_35775\_Opisthokonta\_Choanoflagellida:0.4799428336,((((((((((((((((Alexandrium-temarense-CCMP1771-  
20130823\_405166\_1:0.2582221535,Scrippsiella-hangoei-SHTV5-  
20131105\_129680\_1:0.4488957369):0.4045670100,Cryptothecodinium\_cohnii\_WH\_Provasly-  
Seligo\_CAMPEP\_0193932514:0.3012689995):0.1206385833,((((Aplanochytrium-sp-PBS07-  
20140214\_161485\_1:0.3555901191,(SEED\_Artemidia\_motanka\_TRINITY\_DN15980\_c4\_g5\_i1:0.2676357074,(SEED\_Na  
mystynia\_karyoxenos\_TRINITY\_DN89136\_c0\_g1\_i1:0.1100771516,SEED\_Sulcionema\_specki\_TRINITY\_DN24282\_c1\_g1\_i  
1:0.2552773747):0.0816210166):0.1010433252):0.0555519179,Undescribed-sp-CCMP2436-  
20130826\_9488\_1:0.4974049891):0.0089568098,(SEED\_Monosiga\_brevicollis\_\_Choanoflagellata\_\_APX2\_6306\_MbrAPx  
01:0.3249027813,SEED\_Salpingoeca\_sp.\_\_Choanoflagellata\_\_APX2\_11129\_SAspAPx01:0.6406658181):0.1564732249):0  
.0532104613,Chrysochromulina-polylepis-CCMP1757-  
20130903\_147481\_1:0.3577300785):0.0740498441,(((Durinskia\_baltica\_CSIRO\_CS-  
38\_CAMPEP\_0199942210:0.1786917746,Symbiodinium\_microadriaticum\_OLP81201.1\_putative\_L-  
ascorbate\_peroxidase\_7\_\_chloroplastic:0.3760242337):0.0809307226,Karenia\_brevis\_MMETSP0201\_Gene.62695-  
Transcript\_54590\_Dinophyta\_Gymnodinales:0.3607998209):0.0844633386,(((SEED\_Heterocapsa\_triquetra\_\_Dinoflagel  
lata\_\_APX2\_2364\_HtrAPx01:0.2657416377,SEED\_Karlodinium\_micrum\_\_Dinoflagellata\_\_APX2\_3944\_KmAPx01:0.1584  
784386):0.0857746088,Symbiodinium\_microadriaticum\_OLP89888.1\_putative\_L-  
ascorbate\_peroxidase\_7\_\_chloroplastic:0.1643165697):0.0374100190,SEED\_Oxyrrhis\_marina\_\_Dinoflagellata\_\_APX2\_1  
3535\_OmarAPx01:0.2671773075):0.1133740826):0.0327784263,(((Ostreococcus\_tauri\_XP\_003074417.1\_chloroplast\_as  
corbate\_peroxidase\_\_ISS\_:0.2860756314,Pyramimonas-parkeae-CCMP726-  
20131001\_721\_1:0.3673569433):0.0775410388,SEED\_Micromonas\_pusilla\_\_Chlorophyta\_\_APX2\_11130\_MpuAPx01:0.  
2389665078):0.0841747686,SEED\_Bigelowiella\_natans\_\_Rhizaria\_\_APX2\_2512\_BnaAPx01:0.4265877014):0.086846008  
4):0.0663447642):0.0682003812):0.0667212430,((((((Dinophysis\_acuminata\_CAMPEP\_0179227314\_Dinophyta\_Dinoph  
ysiales:0.5107858685,(SEED\_Phaeodactylum\_tricornutum\_\_Stramenopila\_\_APX2\_2571\_PtrAPx01:0.0608757369,SEED\_  
Thalassiosira\_pseudonana\_\_Stramenopila\_\_APX2\_2558\_TpsAPx02:0.1482984233):0.0608750835):0.0448343751,SEED\_  
Guillardia\_theta\_\_Cryptophyta\_\_APX2\_13019\_GtAPx02:0.0687858912):0.0173975934,Rhodomonas\_lens\_MMETSP048  
4\_Gene.19640-  
Transcript\_12385\_Cryptophyta\_Pyrenomonadales:0.1983868215):0.0541687749,Guillardia\_theta\_MMETSP0046\_Gene.  
34396-Transcript\_14618\_Cryptophyta\_Pyrenomonadales:0.1685588972):0.1751092276,(Hemiselmis-  
tepida\_MMETSP1355-  
20121228\_35325\_1:0.2917722247,Klebsormidium\_nitens\_GAQ79980.1\_ascorbate\_peroxidase:0.6165955307):0.05745  
67637):0.0389664407,(Dunaliella-tertiolecta-CCMP1320-  
20130909\_10980\_1:0.3430469622,(Klebsormidium\_nitens\_GAQ80163.1\_ascorbate\_peroxidase:0.2782663029,(((SEED  
\_Arabidopsis\_thaliana\_\_Streptophyta\_\_APX2\_1886\_AtAPx05:0.1322120075,Sorghum\_bicolor\_XP\_021316116.1\_probab  
le\_L-  
ascorbate\_peroxidase\_8\_\_chloroplastic\_isoform\_X1:0.1119127387):0.0653577370,SEED\_Physcomitrella\_patens\_\_Strep  
tophyta\_\_APX2\_2497\_PpaAPx02:0.2885329011):0.0702716452,SEED\_Selaginella\_moellendorffii\_\_Streptophyta\_\_APX2  
\_7198\_SmAPx03:0.1487839545):0.1455879782,(SEED\_Chlamydomonas\_reinhardtii\_\_Chlorophyta\_\_APX2\_1958\_CreAPx  
02:0.2829783581,SEED\_Chlorella\_vulgaris\_\_Chlorophyta\_\_APX2\_2636\_CvAPx01:0.3989233367):0.0899889104):0.0887  
840974):0.0674395935):0.0321346243):0.0992350738,((SEED\_Ectocarpus\_siliculosus\_\_Stramenopila\_\_APX2\_13374\_Esi  
IAPx01:0.4058125973,SEED\_Vitrella\_brassicaformis\_CEM12648.1:0.3847436229):0.0425200356,SEED\_Vitrella\_brassicaf  
ormis\_\_Alveolata\_\_APX2\_13536\_VbraAPx01:0.3683347766):0.0187912019):0.1109479328):0.1143727114,(((Chlamydo  
monas-euryale\_MMETSP0063\_2-20130828\_62321\_1:0.1033356054,Tetraselmis-striata-LANL1001-  
20140214\_117058\_1:0.1448357222):0.2985933071,SEED\_Cyanidioschyzon\_merolae\_\_Rhodophyta\_\_APX2\_2611\_CmeA  
Px01:0.4471611357):0.1024478914,(Climacostomum-virens\_MMETSP1397-  
20131031\_1011\_1:0.5940688572,SEED\_Perkinsus\_marinus\_\_Alveolata\_\_APX2\_11145\_PmariAPx01:0.4953608562):0.19  
81606060):0.0730142215):0.0432083832,(Proteomonas-sulcata\_MMETSP1049-  
20130417\_3516\_1:0.6546435603,SEED\_Guillardia\_theta\_\_Cryptophyta\_\_APX2\_13353\_GtAPx03:0.4818331555):0.3717



679710):0.0604571353,((((((((Alexandrium\_tamarensis\_MMETSP0384\_Gene.140806-  
Transcript\_86135\_Dinophyta\_Gonyaulacales:0.7830904689,Prasinococcus\_capsulatus\_MMETSP0941\_Gene.17794-  
Transcript\_6790\_Chlorophyta\_Prasinococcales:1.8730203545):0.5352779285,(Micromonas\_MMETSP1080-  
20121227\_4761\_1:0.2158839597,SEED\_Micromonas\_pusilla\_\_Chlorophyta\_\_APX4\_15865\_MpuAPx02:0.1552600820):1  
.1898182960):0.4226018126,(((Euglena\_gracilis\_GDJR01039455.1\_m.86725\_Euglenozoa\_Euglenophyta:0.7147021263,E  
utreptiella\_gymnastica-like\_CCMP1594\_MMETSP0811\_Gene.96963-  
Transcript\_101747\_Euglenozoa\_Euglenophyta:0.3988134961):0.0842608711,((Eutreptiella-  
gymnastica\_MMETSP0039\_2-20120614\_21586\_1:0.8743744586,(Eutreptiella\_gymnastica\_NIES-  
381\_Transcript\_108943-m.115750\_Euglenozoa\_Euglenophyta:0.5635037737,Eutreptiella\_gymnastica\_NIES-  
381\_Transcript\_62771-  
m.69171\_Euglenozoa\_Euglenophyta:0.5751075809):0.1316417824):0.3135583150,Eutreptiella\_gymnastica-  
like\_CCMP1594\_MMETSP0809\_Transcript\_4877-  
m.4987\_Euglenozoa\_Euglenophyta:0.5320652761):0.0609262896):0.4316228405,Pyramimonas-  
obovata\_MMETSP1169-  
20130426\_1770\_1:1.2273192502):0.4599544969):0.0523293246,(((Chlorella\_variabilis\_XP\_005847371.1\_hypothetical-  
protein\_CHLNCDRAFT\_48220:0.6830188395,((Picochlorum\_sp.\_MMETSP1330\_Transcript\_3147-  
m.6609\_Chlorophyta\_Trebouxiophyceae:0.7589710490,Tetraselmis-striata-LANL1001-  
20140214\_117711\_1:0.9834187614):0.1199234140,(SEED\_Chlamydomonas\_reinhardtii\_\_Chlorophyta\_\_APX4\_2805\_Cr  
eAPx01:0.2963862399,SEED\_Volvox\_carteri\_\_Chlorophyta\_\_APX4\_8560\_VcaAPx01:0.1644153866):0.2582753526):0.11  
31649233):0.1373537343,Stichococcus\_MMETSP1473-  
20131121\_25656\_1:0.7323608821):0.1519108230,(Nephroselmis-pyriformis\_MMETSP0034\_2-  
20130328\_17760\_1:1.0912089801,Picocystis-salinarum-CCMP1897-  
20130926\_1711\_1:0.9337169191):0.3610567570):0.4482953105):0.0836153780,(Pycnococcus\_MMETSP1085-  
20130531\_6256\_1:0.5536861591,uncultured-eukaryote\_MMETSP1310-  
20130426\_10555\_1:0.9830490600):1.1825651590):0.1655627441,Klebsormidium\_nitens\_GAQ82344.1\_ascorbate\_pero  
xidase:1.0122206394):0.0814803130,(((SEED\_Arabidopsis\_thaliana\_\_Streptophyta\_\_APX4\_3920\_AtAPx07:0.235022873  
0,xxx\_Corchorus\_capsularis\_OMO94487.1\_heme\_peroxidase\_\_plant\_fungal\_bacterial:0.1204201789):0.0797946518,(S  
EED\_Brachypodium\_distachyon\_\_Streptophyta\_\_APX4\_7925\_BdiAPx08:0.1360015548,xxx\_Dichanthelium\_oligosanthes  
\_OEL32843.1\_Thylakoid\_luminal\_29\_kDa\_protein\_\_chloroplastic:0.0805090817):0.0728186905):0.2083346798,SEED\_  
Marchantia\_polymorpha\_\_Streptophyta\_\_APX4\_7344\_MpAPx04:0.4335800602):0.2410027466):0.7729424948,(((Arabi  
dopsis\_thaliana\_Q9LNLO\_Viridiplantae\_Streptophyta:1.4454062281,Oryza\_sativa\_Japonica\_NP\_001048638\_Viridiplanta  
e\_Streptophyta:0.3939245907):0.4831084507,Chattonella-subsalsa-CCMP2191-  
20130903\_28645\_1:1.2110500361):0.1701475286,SEED\_Chlorella\_sorokiniana\_\_Chlorophyta\_\_APX7\_15185\_CsorAPx0  
2:1.8990925135):0.2967643363,(Chlamydomonas\_reinhardtii\_MMETSP1391\_Gene.16250-  
Transcript\_9787\_Chlorophyta\_Chlorophyceae:0.5506001715,Klebsormidium\_nitens\_GAQ79820.1\_L-  
ascorbate\_peroxidase:0.7974480598):0.2849054977):0.1016400712):0.0326584993,(((Eutreptiella\_gymnastica\_NIES-  
381\_Transcript\_79356-m.86242\_Euglenozoa\_Euglenophyta:0.3931838200,(Ostreococcus-\_lucimarinus\_\_MMETSP0939-  
20121108\_1360\_1:0.6956540524,Pyramimonas-parkeae-CCMP726-  
20131001\_13231\_1:0.4894516038):0.0666004937):0.1426730017,(Stichococcus\_MMETSP1473-  
20131121\_7338\_1:0.6029321284,Tetraselmis-striata-LANL1001-  
20140214\_3195\_1:0.4505865374):0.0989852857):0.2186612717,((Fragaria\_vesca\_XP\_011459177.1\_putative\_L-  
ascorbate\_peroxidase\_6:0.4016330766,Prasinococcus\_capsulatus\_MMETSP0941\_Gene.14333-  
Transcript\_5569\_Chlorophyta\_Prasinococcales:0.7476716751):0.1223779590,Prasinoderma-coloniale\_MMETSP0806\_2-  
20130528\_8641\_1:1.1681884745):0.0413322735):0.3570991027):0.1236423106,(Cyanoptycha-  
gloeocystis\_MMETSP1086-20130531\_37175\_1:1.0671494049,Synchroma-pusillum\_MMETSP1452-  
20131203\_3767\_1:1.9245949090):0.2945069749):0.4026632068):0.0990374925,(Pyramimonas-parkeae-CCMP726-  
20131001\_134760\_1:1.1616828668,(((SEED\_Arabidopsis\_thaliana\_\_Streptophyta\_\_APX1\_1890\_AtAPx01:0.1765574573  
,(SEED\_Brachypodium\_distachyon\_\_Streptophyta\_\_APX1\_7906\_BdiAPx01:0.1008721002,SEED\_Selaginella\_moellendorf  
fii\_\_Streptophyta\_\_APX1\_3324\_SmAPx01:0.2512911639):0.0940626885):0.0066904395,SEED\_Physcomitrella\_patens\_\_

Streptophyta\_\_APX1\_2325\_PpaAPx01:0.3135808018):0.1753091331,(((SEED\_Arabidopsis\_thaliana\_\_Streptophyta\_\_APX3\_1891\_AtAPx03:0.1015188312,SEED\_Brachypodium\_distachyon\_\_Streptophyta\_\_APX3\_7876\_BdiAPx03:0.1438866575):0.0556699894,(SEED\_Physcomitrella\_patens\_\_Streptophyta\_\_APX3\_2498\_PpaAPx03:0.1519719551,SEED\_Selaginella\_moellendorffii\_\_Streptophyta\_\_APX3\_7196\_SmAPx02:0.0932756415):0.0701120110):0.0275691237,SEED\_Arabidopsis\_thaliana\_\_Streptophyta\_\_APX5\_1887\_AtAPx04:0.3280895109):0.0821916580):0.1051538951):0.0376072613):0.0498332631,(((Erythrolobus-australicus\_MMETSP1353-20130828\_18498\_1:0.3527052062,SEED\_Porphyrura\_zezoensis\_\_Rhodophyta\_\_APX6\_13396\_PyAPx01:0.2264833863):0.0550265548,(SEED\_Chondrus\_crispus\_\_Rhodophyta\_\_APX6\_2631\_CcriAPx01:0.4241618486,(SEED\_Chondrus\_crispus\_\_Rhodophyta\_\_APX6\_2632\_CcriAPx02:0.2953298351,SEED\_Galdieria\_sulphuraria\_\_Rhodophyta\_\_APX6\_2566\_GsAPx01:0.3723963802):0.0258335203):0.0481023470):0.0649685213,SEED\_Porphyridium\_cruentum\_\_Rhodophyta\_\_APX6\_13397\_PcruAPx01:0.4178863315):0.1519615314):0.1939124340,(((SEED\_Euglena\_gracilis\_\_APX-CCP\_BAC05484:0.1618286676,SEED\_Euglena\_sp.\_\_Euglenida\_\_APX-CCP\_13415\_EUgAPx-CcP03:0.1150075262):0.1359099047,(SEED\_Eutreptiella\_gymnastica-like\_CCMP1594\_CAMNT\_0046500393:0.1139509626,SEED\_Eutreptiella\_gymnastica-like\_CCMP1594\_CAMNT\_0046515501:0.0704616901):0.1045292970):0.0646606604,SEED\_Eutreptiella\_gymnastica\_NIES-381\_CAMNT\_0000688179:0.1727320646):0.1031606172,(SEED\_Eutreptiella\_gymnastica\_NIES-381\_CAMNT\_0000682101:0.1997848076,(SEED\_Eutreptiella\_gymnastica\_NIES-381\_CAMNT\_0000690323:0.0000023451,SEED\_Eutreptiella\_gymnastica\_NIES-381\_CAMNT\_0000708097:0.0000023451):0.0000020636,SEED\_Eutreptiella\_gymnastica\_NIES-381\_CAMNT\_0000693181:0.0523283508):0.0142065732):0.1791774229):0.1703681345):0.1229264546,(((Chrysochromulina-polylepis-CCMP1757-20130903\_169011\_1:0.2132803633,(Pleurochrysis-carterae-CCMP645-20130926\_177674\_1:0.5781481282,Prymnesium-parvum-Texoma1-20131001\_22049\_1:0.2744531289):0.1247555719,Prymnesium-parvum-Texoma1-20131001\_24982\_1:0.2147489663):0.1046073246):0.1750312092,Isochrysis-galbana-CCMP1323-20130912\_17711\_1:0.6019072789):0.3306018066,(((Chrysochromulina-polylepis-CCMP1757-20130903\_20923\_1:0.3118191386,SEED\_Emiliania\_huxleyi\_\_Haptophyta\_\_APX-CCP\_15881\_EhuxAPx-CcP04:0.2288904514):0.2779760753,(Isochrysis-galbana-CCMP1323-20130912\_18445\_1:0.0854435151,SEED\_Isochrysis\_sp.\_\_Haptophyta\_\_CCP9\_13317\_IspCcP05:0.0680520645):0.1513157462,Prymnesium-parvum-Texoma1-20131001\_13108\_1:0.3485228100):0.0747627605):0.2499460543,(Lotharella-globosa-CCCM811-20130918\_11324\_1:0.0858757967,SEED\_Bigelowiella\_natans\_\_Rhizaria\_\_APX-CCP\_11106\_BnaAPx-CcP:0.1463487262):0.5395609427,SEED\_Plasmodiophora\_brassicae\_CEO99391.1:0.3976259403):0.0941353783):0.0601479943,((((Dinophysis\_acuminata\_CAMPEP\_0179259890\_Dinophyta\_Dinophysiales:0.2461304068,(((Haptolina-ericina\_MMETSP1096-20121128\_13351\_1:0.4594975748,SEED\_Thalassiosira\_pseudonana\_\_Stramenopila\_\_APX-CCP\_2557\_TpsAPx-CcP01:0.1969960349):0.0522318652,Rhizochromulina\_marina\_MMETSP1173\_Gene.18745-Transcript\_9751\_Stramenopila\_Dicthyochophyceae:0.2317188903):0.0498836221,Mesodinium\_pulex\_MMETSP0467\_Gene.77675-Transcript\_52191\_Ciliophora\_Litostomatea:0.3121950276):0.0645919581,(SEED\_Emiliania\_huxleyi\_\_Haptophyta\_\_APX-CCP\_13365\_EhuxAPx-CcP03:0.3362746919,Scrippsiella-hangoei-SHTV5-20131105\_129681\_1:0.1738864532):0.0240715492):0.0866268840):0.0361811865,SEED\_Symbiodinium\_sp.\_\_Dinoflagellata\_\_APX-CCP\_13187\_SymAPx-CcP1\_F1:0.4149099201):0.0453891635,SEED\_Ochromonas\_sp.\_\_Stramenopila\_\_APX-CCP\_13322\_OCgrAPx-CcP03:0.1639129504):0.0988179202,Karenia\_brevis\_MMETSP0027\_Gene.36904-Transcript\_30870\_Dinophyta\_Gymnodiniales:0.2860789491):0.1763099918,(Phaeocystis\_MMETSP1162-20130426\_4569\_1:0.4638936534,Prymnesium-parvum-Texoma1-20131001\_199463\_1:0.5382319950):0.1552764533,SEED\_Chrysochromulina\_tobin\_\_Haptophyta\_\_APX-CCP\_13471\_CtoAPx-CcP01:0.5301052341):0.2296349654):0.2274477386,(Norrisiella-sphaerica\_MMETSP0113\_2-20130426\_52835\_1:0.1826958037,SEED\_Bigelowiella\_natans\_\_Rhizaria\_\_CCP\_2510\_BnaCcP01:0.1101447431):0.4871909323):0.0172340858):0.0719699876):0.0508890675,(SEED\_Artemidia\_motanka\_TRINITY\_DN17334\_c8\_g3\_i1:0.2337138148,SEED\_Namystynia\_karyoxenos\_TRINITY\_DN22390\_c0\_g1\_i1:0.1415549914):0.3306232949):0.0278808013):0.1352451242,(((((((SEED\_C4B63\_47g23-

t42\_1\_Trypanosoma\_cruzi\_Dm28c\_2018:0.0342790097,SEED\_Tc\_MARK\_3376\_Trypanosoma\_cruzi\_marinkellei:0.0143749540):0.1364423321,SEED\_DQ04\_02591010-

t26\_1\_Trypanosoma\_grayi:0.0793711377):0.0580683993,SEED\_TM35\_000011050-

t36\_1\_Trypanosoma\_theileri:0.1259540826):0.0569719161,SEED\_PCON\_0074310.mRNA\_Paratrypanosoma\_confusum:0.2635188697):0.1056707001,SEED\_rna\_Baya\_117\_0180-

1\_Blechomonas\_ayalai:0.3143218795):0.0803691984,((((SEED\_CFAC1\_290028200.1\_Crithidia\_fasciculata:0.0613697183,SEED\_rna\_Lsey\_0078\_0210-

1\_Leptomonas\_seymouri:0.0570830122):0.0371841853,SEED\_c6407\_g1\_i1\_Crithidia\_thermophila:0.0684115909):0.0113426565,SEED\_rna\_LpyrH10\_05\_0250\_Leptomonas\_pyrrhocoris:0.0957432945):0.0225087988,(SEED\_EMOLV88\_34006000.1\_Endotrypanum\_monterogeei:0.1578596734,(((SEED\_LENLEM3045\_340005600.1\_Leishmania\_enriettii:0.0318071391,SEED\_LMARLEM2494\_340005600.1\_Leishmania\_sp.\_MAR\_LEM2494:0.0498217707):0.0349041917,(SEED\_LmjF.34.0070\_Leishmania\_major\_Friedlin:0.0597597933,SEED\_LmxM.33.0070.1\_Leishmania\_mexicana:0.0415564245):0.0460357457):0.0273388181,SEED\_NODE\_82\_Novymonas\_esmeraldas:0.0820190344):0.0248492218):0.0306888251):0.1086391229,Strigomonas\_culicis\_EPY37063.1\_L-

ascorbate\_peroxidase:0.2098527592):0.0725591740):0.3140564306,SEED\_Lacrimia\_lanifica\_TRINITY\_DN11414\_c4\_g13\_i1:0.4912223954):0.1244791728):0.1308348323,((((Alexandrium\_tamarense\_MMETSP0384\_Gene.274304-Transcript\_168547\_Dinophyta\_Gonyaulacales:0.3946360354,((Chlamydomonas-euryale\_MMETSP0063\_2-20130828\_11317\_1:0.3505846317,Polytomella-parva\_MMETSP0052\_2-20121109\_7164\_1:0.3352029811):0.0651694873,Chlamydomonas-euryale\_MMETSP0063\_2-20130828\_63691\_1:0.1589002677):0.0876688266):0.0939544193,((Candida\_maltosa\_EMG50043.1\_hypothetical\_protein\_G210\_4953:0.2969706445,Debaryomyces\_hansenii\_XP\_462060.2\_DEHA2G12166p:0.4136224034):0.3725589178,(Chlamydomonas-leiostraca\_MMETSP1391-

20130828\_9607\_1:0.3197047525,(Phytophthora\_sojae\_XP\_009521257.1\_hypothetical\_protein\_PHYSODRAFT\_482248:0.9054243758,Protoceratium-reticulatum\_MMETSP0228-

20121227\_49520\_1:0.2829266507):0.8432552424):0.1157493597):0.1262254858):0.0403573586,(Picochlorum-oklahomense\_MMETSP1161-20130426\_1898\_1:0.2775435861,(Pilocystis\_salinarum\_MMETSP0807\_Transcript\_9903-m.42985\_Chlorophyta\_prasinophyte\_CL\_VII:0.2429849951,Stygamoeba-regulata\_MMETSP0447-

20121125\_18088\_1:0.2858025086):0.0479153796):0.0635104463):0.0523015794,(((Aplanochytrium\_MMETSP0957\_Transcript\_11830-m.9960\_Stramenopila\_Labyrinthulomycetes:0.3588637429,Schizochytrium-aggregatum-ATCC28209-

20130930\_104702\_1:0.1833204754):0.2136567818,(((((((Chromera\_velia\_Cvel\_2127.t1-p1\_Apicomplexa:0.2881774783,(((Chroomonas-cf.-mesostigmatica\_MMETSP0047\_2-

20121206\_36962\_1:0.3882454770,(Karenia-brevis-Wilson-20130916\_37417\_1:0.2054956124,Noctiluca-scintillans\_MMETSP0253-20130528\_95621\_1:0.1424027927):0.2446337876):0.1032933676,(((Mantoniella-antarctica\_MMETSP1106-20121128\_25042\_1:0.1538764879,Micromonas-sp-NEPCC29-

20130920\_2226\_1:0.1043209519):0.2926228975,Prasinoderma-singularis\_MMETSP1315-

20130426\_68631\_1:0.3162526338):0.1435324727,Prymnesium-parvum-Texoma1-

20131001\_10048\_1:0.2836386530):0.0393368651):0.1201594479,Oxyrrhis\_marina\_MMETSP0471\_Transcript\_28376-m.41957\_Dinophyta\_Oxyrrhinales:0.4908498574):0.0879138321):0.2077724418,Ogataea\_parapolyomorpha\_XP\_013935847.1\_hypothetical\_protein\_HPODL\_00424:0.8557099751):0.0273330141,Sugiyamaella\_lignohabitans\_XP\_018738120.1\_Ccp1p:0.4850102931):0.0995152706,Rozella\_allomyces\_EPZ35358.1\_Plant\_ascorbate\_peroxidase\_domain-containing\_protein:0.3540831235):0.0110868358,((Fusarium\_oxysporum\_EGU74407.1\_hypothetical\_protein\_FOXB\_15079:0.2073878724,(Trichophyton\_benhamiae\_XP\_003012241.1\_bifunctional\_catalase-peroxidase\_Cat2:0.2071127338,xxx\_Botrytis\_cinerea\_EMR84675.1\_putative\_cytochrome\_c\_peroxidase\_protein:0.1470613752):0.0668554782):0.2145661596,xxx\_Tsuchiyaea\_wingfieldii\_XP\_019030344.1\_cytochrome\_c\_peroxidase:0.3736187976):0.0501142855):0.0306247847,(Synchroma\_pusillum\_MMETSP1452\_Transcript\_7936-

m.19741\_Stramenopila\_Synchromophyceae:0.4326000063,xxx\_Nannochloropsis\_gaditana\_EWM29691.1\_cytochrome\_c\_peroxidase:0.5760381092):0.0909820651):0.0096936162,(((Cyberlindnera\_fabianii\_CDR36592.1:0.4262235040,Pachysolen\_tannophilus\_ODV96415.1\_hypothetical\_protein\_PACTADRAFT\_49767:0.4914934992):0.0495276575,xxx\_Ascoid\_ea\_rubescens\_XP\_020047494.1\_heme\_peroxidase:0.4061857159):0.1423352557,(xxx\_Mucor\_ambiguus\_GAN10078.1\_

cytochrome\_c\_peroxidase\_Ccp1:0.2768337217,xxx\_Syncephalastrum\_racemosum\_ORY95648.1\_heme\_peroxidase:0.5169282062):0.2440827336):0.1091324916,(Dactylellina\_haptotyla\_XP\_011116536.1\_hypothetical\_protein\_H072\_11173:0.2343327716,xxx\_AspERGillus\_udagawae\_GAO84407.1\_cytochrome\_c\_peroxidase\_\_mitochondrial:0.2983428265):0.1088861692):0.0849053495):0.0335629720):0.0170138673,(((Bigelowiella-natans\_MMETSP1054-20121227\_11945\_1:0.3953149117,Micromonas-pusilla\_MMETSP1401-20130829\_1406\_1:0.3575994003):0.0307460238,(Chroomonas\_cf.\_mesostigmatica\_MMETSP0047\_Transcript\_38188-m.63215\_Cryptophyta\_Pyrenomonadales:0.5656322299,Hemiselmis-andersenii\_MMETSP0043\_2-20121206\_17536\_1:0.2335066119):0.1353223330):0.1994290312,Erythrolobus-madagascarensis\_MMETSP1354-20130828\_2272\_1:0.3452992071):0.1533092822,Pavlova-lutheri\_MMETSP1463-20131121\_85637\_1:0.3584389242):0.0520222623):0.0496034107):0.0576194258,((Hemiselmis-tepida\_MMETSP1355-20121228\_24535\_1:0.3407153703,(SEED\_Artemidia\_motanka\_TRINITY\_DN15980\_c4\_g3\_i1:0.2485103545,SEED\_Namystynia\_karyoxenos\_TRINITY\_DN77678\_c0\_g1\_i1:0.2099694792):0.2373466782):0.0801886117,(((SEED\_Diplonema\_japonicum\_TRINITY\_DN10300\_c4\_g1\_i2:0.3589844892,SEED\_Diplonema\_papillatum\_TR110952\_c20\_g26\_i1\_\_m.25215:0.5573200448):0.1164637868,SEED\_Lacrimia\_lanifica\_TRINITY\_DN7350\_c0\_g1\_i1:0.2015149014):0.0816468150,SEED\_Diplonema\_japonicum\_TRINITY\_DN10460\_c6\_g1\_i1:0.6217692494):0.1784728353,SEED\_Sulcionema\_specki\_TRINITY\_DN80007\_c0\_g1\_i1:0.2627372732):0.1957374477):0.0359762296):0.1123872761):0.0395786311,(Hemiselmis-andersenii\_MMETSP0043\_2-20121206\_19730\_1:0.7115808715,xxx\_Basidiobolus\_meristosporus\_ORX96746.1\_heme\_peroxidase:0.8012166188):0.2060867501):0.0512122812,(((SEED\_Artemidia\_motanka\_TRINITY\_DN14823\_c0\_g2\_i1:1.9799975320,SEED\_Namystynia\_karyoxenos\_TRINITY\_DN89651\_c0\_g1\_i1:0.5586025663):0.6449962249,((SEED\_Diplonema\_japonicum\_TRINITY\_DN10282\_c5\_g3\_i2:1.7089183301,SEED\_Lacrimia\_lanifica\_TRINITY\_DN4895\_c0\_g1\_i1:0.6499795321):0.6023067963,SEED\_Sulcionema\_specki\_TRINITY\_DN77967\_c0\_g1\_i1:0.9835455868):0.2953448439):0.1982942712,((SEED\_Artemidia\_motanka\_TRINITY\_DN6375\_c0\_g1\_i2:0.4919748733,SEED\_Namystynia\_karyoxenos\_TRINITY\_DN15097\_c0\_g1\_i1:0.2320110933):0.2853496216,SEED\_Sulcionema\_specki\_TRINITY\_DN23548\_c0\_g1\_i2:0.3780959899):0.9118192544):0.1871486434,((((SEED\_Artemidia\_motanka\_TRINITY\_DN24471\_c0\_g1\_i1:0.3101525921,SEED\_Namystynia\_karyoxenos\_TRINITY\_DN52435\_c0\_g1\_i1:0.3088393514):0.2525126253,SEED\_Sulcionema\_specki\_TRINITY\_DN10012\_c0\_g1\_i1:0.5769621105):0.2224924329,(SEED\_Diplonema\_japonicum\_TRINITY\_DN8053\_c0\_g1\_i1:0.3152424652,SEED\_Diplonema\_papillatum\_TR8739\_c0\_g1\_i1\_\_m.830:0.3071094873):0.0752818023):0.0612374172,SEED\_Lacrimia\_lanifica\_TRINITY\_DN8638\_c0\_g1\_i1:0.5335790780):0.1337988577,SEED\_Rhynchopus\_humris\_TRINITY\_DN40212\_c0\_g1\_i1:0.5475506233):0.8435430484,(((((((SEED\_Diplonema\_japonicum\_TRINITY\_DN10642\_c2\_g3\_i1:1.0677218664,SEED\_Sulcionema\_specki\_TRINITY\_DN70017\_c0\_g1\_i1:0.2780614161):0.1255612069,SEED\_Diplonema\_papillatum\_TR45711\_c0\_g1\_i1\_\_m.5672:0.5595834723):0.0000022146,SEED\_Lacrimia\_lanifica\_TRINITY\_DN11235\_c0\_g1\_i6:1.0342145855):0.1457780245,SEED\_Lacrimia\_lanifica\_TRINITY\_DN11643\_c1\_g8\_i2:0.3305463756):0.2632988621,(SEED\_Rhynchopus\_humris\_TRINITY\_DN63548\_c0\_g1\_i1:0.0000023451,SEED\_Sulcionema\_specki\_TRINITY\_DN49103\_c1\_g2\_i3:0.0000020772):0.5225223454):0.3371255584,SEED\_Lacrimia\_lanifica\_TRINITY\_DN11361\_c1\_g9\_i2:0.7822948611):0.2878423704,(SEED\_Rhynchopus\_humris\_TRINITY\_DN23907\_c1\_g1\_i1:0.8269978875,SEED\_Rhynchopus\_humris\_TRINITY\_DN57024\_c0\_g1\_i1:0.9709829852):0.8894367916):0.4902632284):0.1452959348):0.0638294689):0.0622604622,(((Aplanochytrium\_MMETSP0954\_Transcript\_13863-m.13298\_Stramenopila\_Labyrinthulomycetes:0.2794162704,Thraustochytrium-sp-LLF1b-20130905\_75161\_1:0.2664208160):0.0870635309,(Durinskia-baltica-CSIRO\_CS-38-20140214\_139959\_1:0.4340835557,Exanthemachrysis\_gayraliae\_MMETSP1464\_Transcript\_20828-m.51128\_Haptophyta\_Pavlovaes:0.3217449295):0.0770405286):0.2067844259,Tetrahymena\_thermophila\_EAS01806\_Ciliata\_Oligohymenophorea:0.6112365599):0.2051293920):0.1398580513,(((SEED\_Euglena\_gracilis\_GDJR01082147.1:0.0091837432,SEED\_Euglena\_gracilis\_GEFR01009177.1:0.0030612601):0.0736777836,SEED\_Euglena\_gracilis\_GDJR01082152.1:0.0657510340):0.0293354690,SEED\_Euglena\_gracilis\_GEFR01013723.1:0.0702745706):0.0233927615,SEED\_Euglena\_gracilis\_GEFR01042768.1:0.0459844183):0.0716424266,SEED\_Euglena\_longa\_Contig45548:0.0170398498):0.7729524780):0.2784861030,(Goniomonas-pacifica-CCMP1869-20130911\_167160\_1:0.6129469780,((SEED\_Diplonema\_japonicum\_TRINITY\_DN8646\_c0\_g2\_i1:0.3901908979,SEED\_Diplonema\_papillatum\_TR130880\_c10\_g1\_i1\_\_m.31721:0.6313135691):0.1755021220,(SEED\_Namystynia\_karyoxenos\_

TRINITY\_DN26871\_c0\_g1\_i1:0.3884999283,SEED\_Sulcionema\_specki\_TRINITY\_DN50008\_c0\_g1\_i1:0.5064353222):0.0865739924):0.0880238012):0.1655910784)OROOT;



@Brevundimonas\_Caulobacteraceae\_Caulobacterales\_Alphaproteobacteria\_Proteobacteria\_Bacteria  
WP\_024354401:0.1246740940)61:0.0482175958,(((((((Albimonas pacifica

@Albimonas\_Rhodobacteraceae\_Rhodobacterales\_Alphaproteobacteria\_Proteobacteria\_Bacteria  
WP\_092861411:0.3926947441,Pseudoxanthomonas mexicana

@Pseudoxanthomonas\_Xanthomonadaceae\_Xanthomonadales\_Gammaproteobacteria\_Proteobacteria\_Bacteria  
WP\_062358294:0.1394894861)89:0.0177976073,Roseovarius mucosus

@Roseovarius\_Rhodobacteraceae\_Rhodobacterales\_Alphaproteobacteria\_Proteobacteria\_Bacteria  
WP\_081507981:0.1056014722)75:0.0148726621,(Mesorhizobium alhagi

@Mesorhizobium\_Phyllobacteriaceae\_Rhizobiales\_Alphaproteobacteria\_Proteobacteria\_Bacteria  
WP\_008840002:0.0328760010,Pannonibacter phragmitetus

@Pannonibacter\_Rhodobacteraceae\_Rhodobacterales\_Alphaproteobacteria\_Proteobacteria\_Bacteria  
WP\_094462707:0.0495648406)100:0.0437370165)95:0.0160369365,Palleronia marisminoris

@Palleronia\_Rhodobacteraceae\_Rhodobacterales\_Alphaproteobacteria\_Proteobacteria\_Bacteria  
SLN67837:0.0871250839)100:0.1364231304,Maritalea myrionectae

@Maritalea\_Hyphomicrobiaceae\_Rhizobiales\_Alphaproteobacteria\_Proteobacteria\_Bacteria  
AVX03940:0.1251679974)67:0.0335307021,(Phyllobacterium zundukense

@Phyllobacterium\_Phyllobacteriaceae\_Rhizobiales\_Alphaproteobacteria\_Proteobacteria\_Bacteria  
WP\_099999878:0.1021084567,(Rhodobacteraceae bacterium D4M1

@Rhodobacteraceae\_Rhodobacterales\_Alphaproteobacteria\_Proteobacteria\_Bacteria  
WP\_138578173:0.0264006789,Oceanicella sp. SM1341

@Oceanicella\_Rhodobacteraceae\_Rhodobacterales\_Alphaproteobacteria\_Proteobacteria\_Bacteria  
WP\_118132613:0.0129604690)100:0.1383608824)32:0.0402593038)25:0.0345914485,Pelagibacterium luteolum

@Pelagibacterium\_Hyphomicrobiaceae\_Rhizobiales\_Alphaproteobacteria\_Proteobacteria\_Bacteria  
WP\_090594022:0.1180902513)42:0.0133034076,(((Aquamicrobium defluvii

@Aquamicrobium\_Phyllobacteriaceae\_Rhizobiales\_Alphaproteobacteria\_Proteobacteria\_Bacteria  
WP\_035025201:0.1453188083,(Neorhizobium alkalisoli @Neorhizobium\_Rhizobium/Agrobacterium  
group\_Rhizobiaceae\_Rhizobiales\_Alphaproteobacteria\_Proteobacteria\_Bacteria  
WP\_105381577:0.0856691933,Pseudorhizobium pelagicum @Pseudorhizobium\_Rhizobium/Agrobacterium  
group\_Rhizobiaceae\_Rhizobiales\_Alphaproteobacteria\_Proteobacteria\_Bacteria  
WP\_037161304:0.0581967101)87:0.0076929532)93:0.0371983992,(Rhizobium rhizosphaerae

@Rhizobium\_Rhizobium/Agrobacterium  
group\_Rhizobiaceae\_Rhizobiales\_Alphaproteobacteria\_Proteobacteria\_Bacteria  
WP\_081176475:0.0190918760,Sinorhizobium arboris @Sinorhizobium\_Sinorhizobium/Ensifer  
group\_Rhizobiaceae\_Rhizobiales\_Alphaproteobacteria\_Proteobacteria\_Bacteria  
WP\_027999591:0.1320114517)88:0.0407858753)93:0.0491086459,Mycoplana dimorpha

@Mycoplana\_Brucellaceae\_Rhizobiales\_Alphaproteobacteria\_Proteobacteria\_Bacteria  
PTM98349:0.0882366766)53:0.0227753147,Martellella endophytica

@Martellella\_Aurantimonadaceae\_Rhizobiales\_Alphaproteobacteria\_Proteobacteria\_Bacteria  
WP\_045681354:0.1123233874)78:0.0330441685)23:0.0149078799)38:0.0111150008)53:0.0057636940,(Nitratireductor  
basaltis @Nitratireductor\_Phyllobacteriaceae\_Rhizobiales\_Alphaproteobacteria\_Proteobacteria\_Bacteria  
WP\_036482110:0.0885717127,Chelativorans sp. J32

@Chelativorans\_Phyllobacteriaceae\_Rhizobiales\_Alphaproteobacteria\_Proteobacteria\_Bacteria  
WP\_028034089:0.0499616474)100:0.0461324278)98:0.0443051224,((Acinetobacter nectaris

@Acinetobacter\_Moraxellaceae\_Pseudomonadales\_Gammaproteobacteria\_Proteobacteria\_Bacteria  
WP\_023273437:0.2988684766,Hyphomicrobium facile

@Hyphomicrobium\_Hyphomicrobiaceae\_Rhizobiales\_Alphaproteobacteria\_Proteobacteria\_Bacteria  
WP\_092864409:0.1408598676)78:0.0469654774,(((Bosea thiooxidans

@Bosea\_Bradyrhizobiaceae\_Rhizobiales\_Alphaproteobacteria\_Proteobacteria\_Bacteria  
WP\_055728743:0.0569243015,((Nitratireductor pacificus

@Nitratireductor\_Phylobacteriaceae\_Rhizobiales\_Alphaproteobacteria\_Proteobacteria\_Bacteria  
WP\_008597406:0.0326794109,Nitratireductor soli

@Nitratireductor\_Phylobacteriaceae\_Rhizobiales\_Alphaproteobacteria\_Proteobacteria\_Bacteria  
WP\_048648991:0.0100758986)100:0.0371618206,((Pseudaminobacter salicylatoxidans

@Pseudaminobacter\_Phylobacteriaceae\_Rhizobiales\_Alphaproteobacteria\_Proteobacteria\_Bacteria  
WP\_019173069:0.0040840691,Pseudaminobacter salicylatoxidans

@Pseudaminobacter\_Phylobacteriaceae\_Rhizobiales\_Alphaproteobacteria\_Proteobacteria\_Bacteria  
WP\_109614061:0.0000023247)100:0.0585121647,Bosea vaviloviae

@Bosea\_Bradyrhizobiaceae\_Rhizobiales\_Alphaproteobacteria\_Proteobacteria\_Bacteria  
WP\_054208215:0.0609191463)91:0.0460733559)60:0.0140846627)92:0.0236359935,Cucumibacter marinus

@Cucumibacter\_Hyphomicrobiaceae\_Rhizobiales\_Alphaproteobacteria\_Proteobacteria\_Bacteria  
WP\_029040759:0.0871748788)95:0.0255384098,(Brucella canis

@Brucella\_Brucellaceae\_Rhizobiales\_Alphaproteobacteria\_Proteobacteria\_Bacteria  
WP\_006253319:0.0535018498,Ochrobactrum rhizosphaerae

@Ochrobactrum\_Brucellaceae\_Rhizobiales\_Alphaproteobacteria\_Proteobacteria\_Bacteria  
WP\_094573666:0.0820444762)100:0.0367769173)100:0.0524737564)57:0.0174955735)90:0.0262991194,((Sphingobium yanoikuyae @Sphingobium\_Sphingomonadaceae\_Sphingomonadales\_Alphaproteobacteria\_Proteobacteria\_Bacteria  
WP\_037518597:0.0593106297,Sphingomonas sanxanigenens

@Sphingomonas\_Sphingomonadaceae\_Sphingomonadales\_Alphaproteobacteria\_Proteobacteria\_Bacteria  
WP\_025294563:0.1215640425)100:0.0618493149,Xanthobacter autotrophicus

@Xanthobacter\_Xanthobacteraceae\_Rhizobiales\_Alphaproteobacteria\_Proteobacteria\_Bacteria  
WP\_012114341:0.1064632221)92:0.0280559489)99:0.0156359880,(Arboriscoccus pini

@Arboriscoccus\_Geminicoccaceae\_Rhodospirillales\_Alphaproteobacteria\_Proteobacteria\_Bacteria  
WP\_088561180:0.1831336503,Methylobrevis pamukkalensis

@Methylobrevis\_Rhizobiales\_Alphaproteobacteria\_Proteobacteria\_Bacteria  
WP\_069308299:0.1056308847)100:0.0684094072)100:0.0456166779,Gimesia maris

@Gimesia\_Planctomycetaceae\_Planctomycetales\_Planctomycetia\_Planctomycetes\_Bacteria  
WP\_002644801:0.1369008039)98:0.0252989199,(Desulfonatronovibrio magnus

@Desulfonatronovibrio\_Desulfahalobiaceae\_Desulfovibrionales\_Deltaproteobacteria\_Proteobacteria\_Bacteria  
WP\_045214586:0.0594885374,Desulfonatronum thiosulfatophilum

@Desulfonatronum\_Desulfonatronaceae\_Desulfovibrionales\_Deltaproteobacteria\_Proteobacteria\_Bacteria  
WP\_092116947:0.1078025842)100:0.0691696922)97:0.0256110431,Parachlamydia acanthamoebae

@Parachlamydia\_Parachlamydiaceae\_Parachlamydiales\_Chlamydiae\_Bacteria  
KIA76750:0.1952131212)81:0.0276169043,(Berkiella cookevillensis @Candidatus  
Berkiella\_Coxiellaceae\_Legionellales\_Gammaproteobacteria\_Proteobacteria\_Bacteria  
WP\_057624084:0.1606049457,Legionella fallonii

@Legionella\_Legionellaceae\_Legionellales\_Gammaproteobacteria\_Proteobacteria\_Bacteria  
WP\_045095009:0.2402427574)95:0.0891080003)55:0.0176627888,(Fangia hongkongensis

@Fangia\_Thiotrichales\_Gammaproteobacteria\_Proteobacteria\_Bacteria  
WP\_018300546:0.2370510407,((Marinimicrobium agarilyticum

@Marinimicrobium\_Cellvibrionaceae\_Cellvibrionales\_Gammaproteobacteria\_Proteobacteria\_Bacteria  
WP\_027328912:0.1160332050,Pseudomonas xinjiangensis

@Pseudomonas\_Pseudomonadaceae\_Pseudomonadales\_Gammaproteobacteria\_Proteobacteria\_Bacteria  
WP\_093395539:0.1546222878)94:0.0145515273,(Pseudoalteromonas elyakovii

@Pseudoalteromonas\_Pseudoalteromonadaceae\_Alteromonadales\_Gammaproteobacteria\_Proteobacteria\_Bacteria  
WP\_039495766:0.2609347219,Tistlia consotensis

@Tistlia\_Rhodospirillaceae\_Rhodospirillales\_Alphaproteobacteria\_Proteobacteria\_Bacteria  
WP\_085122001:0.1146724188)95:0.0651546206)90:0.0301893441)66:0.0508571431)95:0.0229499441,(((((((Acetobacter nitrogenifigens @Acetobacter\_Acetobacteraceae\_Rhodospirillales\_Alphaproteobacteria\_Proteobacteria\_Bacteria



WP\_026397660:0.2217803179,(Caenispirillum salinarum  
@Caenispirillum\_Rhodospirillaceae\_Rhodospirillales\_Alphaproteobacteria\_Proteobacteria\_Bacteria  
WP\_009539914:0.2281400726,Sphingomonas haloaromaticamans  
@Sphingomonas\_Sphingomonadaceae\_Sphingomonadales\_Alphaproteobacteria\_Proteobacteria\_Bacteria  
WP\_070932012:0.1868134329)100:0.0309784187)99:0.0513132258,((Aurantimonas coralida  
@Aurantimonas\_Aurantimonadaceae\_Rhizobiales\_Alphaproteobacteria\_Proteobacteria\_Bacteria  
WP\_024349126:0.1208714182,Aureimonas jatrophae  
@Aurantimonas\_Aurantimonadaceae\_Rhizobiales\_Alphaproteobacteria\_Proteobacteria\_Bacteria  
WP\_090671893:0.1194418525)100:0.0655362924,Loktanella cinnabarina  
@Limimanicola\_Rhodobacteraceae\_Rhodobacterales\_Alphaproteobacteria\_Proteobacteria\_Bacteria  
WP\_099273163:0.0946281617)100:0.2463568520)27:0.0148914314,((Cereibacter changlensis  
@Cereibacter\_Rhodobacteraceae\_Rhodobacterales\_Alphaproteobacteria\_Proteobacteria\_Bacteria  
WP\_107663360:0.1230281869,((Defluviimonas alba  
@Defluviimonas\_Rhodobacteraceae\_Rhodobacterales\_Alphaproteobacteria\_Proteobacteria\_Bacteria  
WP\_066812982:0.1775452904,Paracoccus tibetensis  
@Paracoccus\_Rhodobacteraceae\_Rhodobacterales\_Alphaproteobacteria\_Proteobacteria\_Bacteria  
WP\_090743354:0.1823389950)100:0.0770829860,Rhodobacter megalophilus  
@Rhodobacter\_Rhodobacteraceae\_Rhodobacterales\_Alphaproteobacteria\_Proteobacteria\_Bacteria  
WP\_089256123:0.1178760536)41:0.0215593220)100:0.0688925419,Woodsholea maritima  
@Woodsholea\_Caulobacteraceae\_Caulobacterales\_Alphaproteobacteria\_Proteobacteria\_Bacteria  
WP\_019962139:0.1919455785)100:0.0539308021)68:0.0269850862,((Asticcacaulis taihuensis  
@Asticcacaulis\_Caulobacteraceae\_Caulobacterales\_Alphaproteobacteria\_Proteobacteria\_Bacteria  
WP\_090645643:0.1983192570,Hirschia baltica  
@Hirschia\_Hyphomonadaceae\_Rhodobacterales\_Alphaproteobacteria\_Proteobacteria\_Bacteria  
WP\_015826389:0.2411430295)99:0.0451085500,(Phaeospirillum fulvum  
@Phaeospirillum\_Rhodospirillaceae\_Rhodospirillales\_Alphaproteobacteria\_Proteobacteria\_Bacteria  
WP\_021132951:0.1614643508,Rhodomicrobium vannielii  
@Rhodomicrobium\_Hyphomicrobiaceae\_Rhizobiales\_Alphaproteobacteria\_Proteobacteria\_Bacteria  
WP\_013417993:0.1845519710)20:0.0460557705)33:0.0198810041)53:0.0125111291,((((((Aliiglaciecola lipolytica  
@Aliiglaciecola\_Alteromonadaceae\_Alteromonadales\_Gammaproteobacteria\_Proteobacteria\_Bacteria  
WP\_008845795:0.1010826878,(Paraglaciecola mesophila  
@Paraglaciecola\_Alteromonadaceae\_Alteromonadales\_Gammaproteobacteria\_Proteobacteria\_Bacteria  
WP\_006992680:0.0000023268,Pseudoalteromonas atlantica  
@Pseudoalteromonas\_Pseudoalteromonadaceae\_Alteromonadales\_Gammaproteobacteria\_Proteobacteria\_Bacteria  
WP\_011573396:0.0260570425)100:0.1167988408)100:0.0442629002,Salinimonas chungwhensis  
@Salinimonas\_Alteromonadaceae\_Alteromonadales\_Gammaproteobacteria\_Proteobacteria\_Bacteria  
WP\_018982481:0.1430855784)99:0.0211093504,Alteromonas gracilis  
@Alteromonas\_Alteromonadaceae\_Alteromonadales\_Gammaproteobacteria\_Proteobacteria\_Bacteria  
WP\_105929773:0.1322950331)33:0.0210194799,Loktanella hongkongensis  
@Limimanicola\_Rhodobacteraceae\_Rhodobacterales\_Alphaproteobacteria\_Proteobacteria\_Bacteria  
WP\_017928526:0.1473881075)62:0.0125008904,((((((((Aquimixticola soesokkakensis  
@Aquimixticola\_Rhodobacteraceae\_Rhodobacterales\_Alphaproteobacteria\_Proteobacteria\_Bacteria  
WP\_085836344:0.1071600818,Yangia pacifica  
@Yangia\_Rhodobacteraceae\_Rhodobacterales\_Alphaproteobacteria\_Proteobacteria\_Bacteria  
WP\_092426298:0.0408069173)100:0.0471518874,Citreicella marina  
@Salipiger\_Rhodobacteraceae\_Rhodobacterales\_Alphaproteobacteria\_Proteobacteria\_Bacteria  
WP\_089851377:0.0719175617)87:0.0433478018,Poseidonocella pacifica  
@Poseidonocella\_Rhodobacteraceae\_Rhodobacterales\_Alphaproteobacteria\_Proteobacteria\_Bacteria  
WP\_092066816:0.0591876196)97:0.0358611002,(Celeribacter manganoxidans

@Celeribacter\_Rhodobacteraceae\_Rhodobacterales\_Alphaproteobacteria\_Proteobacteria\_Bacteria  
WP\_097373382:0.0771942346,Sulfitobacter dubius

@Sulfitobacter\_Rhodobacteraceae\_Rhodobacterales\_Alphaproteobacteria\_Proteobacteria\_Bacteria  
WP\_093926369:0.1737305619)100:0.0254598713)100:0.0906294998,Sagittula stellata

@Sagittula\_Rhodobacteraceae\_Rhodobacterales\_Alphaproteobacteria\_Proteobacteria\_Bacteria  
WP\_005860934:0.2171896972)45:0.0717737676,(Puniceibacterium antarcticum

@Puniceibacterium\_Rhodobacteraceae\_Rhodobacterales\_Alphaproteobacteria\_Proteobacteria\_Bacteria  
WP\_099912457:0.1990466455,Thioclava dalianensis

@Thioclava\_Rhodobacteraceae\_Rhodobacterales\_Alphaproteobacteria\_Proteobacteria\_Bacteria  
WP\_038065075:0.1836294594)42:0.0196853581)44:0.0258522518,(((Citricella thiooxidans

@Salipiger\_Rhodobacteraceae\_Rhodobacterales\_Alphaproteobacteria\_Proteobacteria\_Bacteria  
WP\_089958747:0.0906928287,Pelagibaca bermudensis

@Salipiger\_Rhodobacteraceae\_Rhodobacterales\_Alphaproteobacteria\_Proteobacteria\_Bacteria  
WP\_007793566:0.0288712255)100:0.0268512679,Thiobacimonas profunda

@Salipiger\_Rhodobacteraceae\_Rhodobacterales\_Alphaproteobacteria\_Proteobacteria\_Bacteria  
WP\_093411896:0.1399862676)90:0.0361705464,(Roseovarius confluentis

@Roseovarius\_Rhodobacteraceae\_Rhodobacterales\_Alphaproteobacteria\_Proteobacteria\_Bacteria  
WP\_103761423:0.1295631816,Sulfitobacter noctilucicola

@Sulfitobacter\_Rhodobacteraceae\_Rhodobacterales\_Alphaproteobacteria\_Proteobacteria\_Bacteria  
KIN63619:0.1749709080)89:0.0111685409)100:0.1503133266)98:0.0236569212,Oceaniovalibus guishaninsula JLT2003

@Oceaniovalibus\_Rhodobacteraceae\_Rhodobacterales\_Alphaproteobacteria\_Proteobacteria\_Bacteria  
EKE43500:0.1584551925)100:0.0128572826,Roseivivax halodurans

@Roseivivax\_Rhodobacteraceae\_Rhodobacterales\_Alphaproteobacteria\_Proteobacteria\_Bacteria  
WP\_037257332:0.2206359192)66:0.0496674117)100:0.2711726270,(((Apibacter mensalis

@Apibacter\_Flavobacteriaceae\_Flavobacteriales\_Flavobacteriia\_Bacteroidetes\_Bacteria  
WP\_055424863:0.2157898766,Pustulibacterium marinum

@Pustulibacterium\_Flavobacteriaceae\_Flavobacteriales\_Flavobacteriia\_Bacteroidetes\_Bacteria  
WP\_093025324:0.1621681959)97:0.0709697709,(((Cellulophaga lytica

@Cellulophaga\_Flavobacteriaceae\_Flavobacteriales\_Flavobacteriia\_Bacteroidetes\_Bacteria  
WP\_038506872:0.0767432070,Zobellia uliginosa

@Zobellia\_Flavobacteriaceae\_Flavobacteriales\_Flavobacteriia\_Bacteroidetes\_Bacteria  
WP\_038236162:0.0834638026)100:0.0314402969,Leeuwenhoekiella blandensis

@Leeuwenhoekiella\_Flavobacteriaceae\_Flavobacteriales\_Flavobacteriia\_Bacteroidetes\_Bacteria  
WP\_009781700:0.2205639119)100:0.0200931030,Crocinitomix catalasitica

@Crocinitomix\_Crocinitomicaceae\_Flavobacteriales\_Flavobacteriia\_Bacteroidetes\_Bacteria  
WP\_027418306:0.1351278083)96:0.0178215909)82:0.0114305146,Aquimarina muelleri

@Aquimarina\_Flavobacteriaceae\_Flavobacteriales\_Flavobacteriia\_Bacteroidetes\_Bacteria  
WP\_027411424:0.1361114414)88:0.0896716113)97:0.1382995592)95:0.0208837148,(((Azospirillum halopraeferens

@Azospirillum\_Rhodospirillaceae\_Rhodospirillales\_Alphaproteobacteria\_Proteobacteria\_Bacteria  
WP\_035691716:0.0786992162,Niveispirillum irakense

@Niveispirillum\_Rhodospirillaceae\_Rhodospirillales\_Alphaproteobacteria\_Proteobacteria\_Bacteria  
WP\_029012920:0.0614554142)100:0.0436721275,Nitrospirillum amazonense

@Nitrospirillum\_Rhodospirillaceae\_Rhodospirillales\_Alphaproteobacteria\_Proteobacteria\_Bacteria  
WP\_004272833:0.1288090935)99:0.0510830817,(((Elstera cyanobacteriorum

@Elstera\_Rhodospirillaceae\_Rhodospirillales\_Alphaproteobacteria\_Proteobacteria\_Bacteria  
WP\_094408407:0.1109074785,Rhodospirillum centenum

@Rhodospirillum\_Rhodospirillaceae\_Rhodospirillales\_Alphaproteobacteria\_Proteobacteria\_Bacteria  
WP\_012568679:0.1326573465)84:0.0371704924,(Enhygromyxa salina

@Enhygromyxa\_Myxococcales\_Deltaproteobacteria\_Proteobacteria\_Bacteria PRP95154:0.2436671194,(Lautropia

mirabilis @Lautropia\_Burkholderiaceae\_Burkholderiales\_Betaproteobacteria\_Proteobacteria\_Bacteria  
WP\_083799446:0.1952217437,(Mitsuaria chitosanitabida  
@Mitsuaria\_Burkholderiales\_Betaproteobacteria\_Proteobacteria\_Bacteria WP\_067066110:0.0672379133,Roseateles  
depolymerans @Roseateles\_Burkholderiales\_Betaproteobacteria\_Proteobacteria\_Bacteria  
WP\_058933257:0.0615116423)100:0.1029929909)20:0.0039646424)82:0.0230733997)70:0.0208147645,(Leptonema  
illini @Leptonema\_Leptospiraceae\_Leptospirales\_Spirochaetes\_Bacteria WP\_002775558:0.1150727527,(Tepidiphilus  
margaritifer @Tepidiphilus\_Hydrogenophilaceae\_Hydrogenophilales\_Hydrogenophilalia\_Proteobacteria\_Bacteria  
WP\_028874022:0.2323455736,Thorsellia anophelis  
@Thorsellia\_Thorselliaceae\_Enterobacteriales\_Gammaproteobacteria\_Proteobacteria\_Bacteria  
WP\_093320748:0.1741141860)83:0.0206695242)98:0.0696750152)76:0.0253912516)93:0.0183130048)100:0.0397427  
060,(Neptunomonas japonica @Neptunomonas\_Oceanospirillales\_Gammaproteobacteria\_Proteobacteria\_Bacteria  
WP\_028469634:0.1434916304,(Saccharophagus degradans  
@Saccharophagus\_Cellvibrionaceae\_Cellvibrionales\_Gammaproteobacteria\_Proteobacteria\_Bacteria  
WP\_011467313:0.0986705640,Terasakiispira papahanaumokuakeensis @Terasakiispira\_unclassified  
Oceanospirillales\_Oceanospirillales\_Gammaproteobacteria\_Proteobacteria\_Bacteria  
WP\_068997014:0.1585884154)79:0.0410285808)100:0.0564000229)98:0.0252864959)84:0.0209862941,Pleomorphom  
onas oryzae @Pleomorphomonas\_Methylocystaceae\_Rhizobiales\_Alphaproteobacteria\_Proteobacteria\_Bacteria  
WP\_026792454:0.1353188965)90:0.0250532314,(Estrella lausannensis  
@Estrella\_Criblamydiaceae\_Parachlamydiales\_Chlamydiae\_Bacteria WP\_098038142:0.2045816356,Lysobacter  
spongiicola @Lysobacter\_Xanthomonadaceae\_Xanthomonadales\_Gammaproteobacteria\_Proteobacteria\_Bacteria  
WP\_078757159:0.3102800927)99:0.0425415104)87:0.0169396798,(Hyphomicrobium denitrificans  
@Hyphomicrobium\_Hyphomicrobiaceae\_Rhizobiales\_Alphaproteobacteria\_Proteobacteria\_Bacteria  
WP\_013216473:0.1763541728,((Hyphomicrobium sulfonivorans  
@Hyphomicrobium\_Hyphomicrobiaceae\_Rhizobiales\_Alphaproteobacteria\_Proteobacteria\_Bacteria  
WP\_068462615:0.3020530026,Nesiotobacter exalbescens  
@Nesiotobacter\_Rhodobacteraceae\_Rhodobacteriales\_Alphaproteobacteria\_Proteobacteria\_Bacteria  
WP\_028480076:0.1212641002)97:0.0826810638,Mongoliimonas terrestris  
@Mongoliimonas\_Rhizobiales\_Alphaproteobacteria\_Proteobacteria\_Bacteria  
WP\_075214554:0.1706506079)90:0.0388043015)85:0.0150738582)100:0.0744740379,Kaistia soli  
@Kaistia\_Rhizobiaceae\_Rhizobiales\_Alphaproteobacteria\_Proteobacteria\_Bacteria  
WP\_073052405:0.1387744950)100:0.0715206398,((((((Acetobacter indonesiensis  
@Acetobacter\_Acetobacteraceae\_Rhodospirillales\_Alphaproteobacteria\_Proteobacteria\_Bacteria  
WP\_048844948:0.0825424587,(((Acidomonas methanolica  
@Acidomonas\_Acetobacteraceae\_Rhodospirillales\_Alphaproteobacteria\_Proteobacteria\_Bacteria  
WP\_042055227:0.1602272467,Neoasaia chiangmaiensis  
@Neoasaia\_Acetobacteraceae\_Rhodospirillales\_Alphaproteobacteria\_Proteobacteria\_Bacteria  
WP\_077808070:0.1626696438)92:0.0192876327,((Bombella intestini  
@Bombella\_Acetobacteraceae\_Rhodospirillales\_Alphaproteobacteria\_Proteobacteria\_Bacteria  
WP\_077396864:0.0368832555,Parasaccharibacter apium  
@Parasaccharibacter\_Acetobacteraceae\_Rhodospirillales\_Alphaproteobacteria\_Proteobacteria\_Bacteria  
WP\_099026622:0.0442033696)100:0.1487417897,Saccharibacter floricola  
@Saccharibacter\_Acetobacteraceae\_Rhodospirillales\_Alphaproteobacteria\_Proteobacteria\_Bacteria  
WP\_018979905:0.1137026535)100:0.1173498522)97:0.0232310989,Gluconobacter frateurii  
@Gluconobacter\_Acetobacteraceae\_Rhodospirillales\_Alphaproteobacteria\_Proteobacteria\_Bacteria  
WP\_010504439:0.0977653602)97:0.0257512956,Tanticharoenia sakaeratensis  
@Tanticharoenia\_Acetobacteraceae\_Rhodospirillales\_Alphaproteobacteria\_Proteobacteria\_Bacteria  
WP\_048849766:0.1117188195)100:0.1165100170)100:0.1216298662,Granulibacter bethesdensis  
@Granulibacter\_Acetobacteraceae\_Rhodospirillales\_Alphaproteobacteria\_Proteobacteria\_Bacteria  
AHJ63856:0.0816112810)100:0.1169938268,Roseomonas deserti

@Roseomonas\_Acetobacteraceae\_Rhodospirillales\_Alphaproteobacteria\_Proteobacteria\_Bacteria  
WP\_076959326:0.1057579036)90:0.0321249258,((Geminicoccus roseus

@Geminicoccus\_Geminicoccaceae\_Rhodospirillales\_Alphaproteobacteria\_Proteobacteria\_Bacteria  
WP\_027133691:0.1773181498,(Microvirga vignae

@Microvirga\_Methylobacteriaceae\_Rhizobiales\_Alphaproteobacteria\_Proteobacteria\_Bacteria  
WP\_047188237:0.0925246327,Prosthecomicrobium hirschii

@Prosthecomicrobium\_Hyphomicrobiaceae\_Rhizobiales\_Alphaproteobacteria\_Proteobacteria\_Bacteria  
WP\_054360216:0.0778440183)99:0.0240114456)100:0.0393140249,Methyloversatilis thermotolerans

@Methyloversatilis\_Sterolibacteriaceae\_Nitrosomonadales\_Betaproteobacteria\_Proteobacteria\_Bacteria  
WP\_018411871:0.2346371946)93:0.0668599289)98:0.0571096675,Caulobacter henricii

@Caulobacter\_Caulobacteraceae\_Caulobacterales\_Alphaproteobacteria\_Proteobacteria\_Bacteria  
WP\_062149950:0.2120705067)99:0.0769091272,((((Arcobacter canalis @Arcobacter\_Arcobacter  
group\_Campylobacteraceae\_Campylobacterales\_Epsilonproteobacteria\_Proteobacteria\_Bacteria  
WP\_099333861:0.2246720927,(Campylobacter fetus

@Campylobacter\_Campylobacteraceae\_Campylobacterales\_Epsilonproteobacteria\_Proteobacteria\_Bacteria  
WP\_065842202:0.2373597164,Helicobacter rodentium

@Helicobacter\_Helicobacteraceae\_Campylobacterales\_Epsilonproteobacteria\_Proteobacteria\_Bacteria  
WP\_026943187:0.2418216093)100:0.1398818527)100:0.1327647041,Sulfurospirillum barnesii

@Sulfurospirillum\_Campylobacteraceae\_Campylobacterales\_Epsilonproteobacteria\_Proteobacteria\_Bacteria  
WP\_014770651:0.1658082988)100:0.0673935685,Pseudoxanthobacter soli

@Pseudoxanthobacter\_Xanthobacteraceae\_Rhizobiales\_Alphaproteobacteria\_Proteobacteria\_Bacteria  
WP\_073625790:0.2075769168)99:0.0661690294,(Prosthecobacter debontii

@Prosthecobacter\_Verrucomicrobiaceae\_Verrucomicrobiales\_Verrucomicrobiae\_Verrucomicrobia\_Bacteria  
WP\_078812524:0.0781204925,Rubritalea squalenifaciens DSM 18772

@Rubritalea\_Rubritaleaceae\_Verrucomicrobiales\_Verrucomicrobiae\_Verrucomicrobia\_Bacteria  
SHI66560:0.1496174649)100:0.0913410885)99:0.0350893446,(Methylocella silvestris

@Methylocella\_Beijerinckiaceae\_Rhizobiales\_Alphaproteobacteria\_Proteobacteria\_Bacteria  
WP\_012591463:0.1822753455,Oceanibaculum pacificum

@Oceanibaculum\_Rhodospirillaceae\_Rhodospirillales\_Alphaproteobacteria\_Proteobacteria\_Bacteria  
WP\_067551728:0.0920990229)67:0.0388565737)61:0.0196023442)98:0.0338014356)99:0.0466332105,((Anaerolinea  
thermolimosa @Anaerolinea\_Anaerolineaceae\_Anaerolineales\_Anaerolineae\_Chloroflexi\_Bacteria  
WP\_062192507:0.0532741226,Ignavibacteria bacterium @Ignavibacteria\_Ignavibacteriae\_Bacteria  
PIS45166:0.2473021924)100:0.0632233417,(Herpetosiphon geysericola

@Herpetosiphon\_Herpetosiphonaceae\_Herpetosiphonales\_Chloroflexia\_Chloroflexi\_Bacteria  
WP\_054536643:0.1231415357,Spirochaeta lutea

@Spirochaeta\_Spirochaetaceae\_Spirochaetales\_Spirochaetes\_Bacteria  
WP\_081942209:0.2824452818)100:0.0465996520)100:0.0674143224)67:0.0232939474,(((Alcanivorax dieselolei

@Alcanivorax\_Alcanivoracaceae\_Oceanospirillales\_Gammaproteobacteria\_Proteobacteria\_Bacteria  
WP\_014996582:0.2100889727,((Dyella japonica

@Dyella\_Rhodanobacteraceae\_Xanthomonadales\_Gammaproteobacteria\_Proteobacteria\_Bacteria  
WP\_046971866:0.1592866557,Rhodanobacter denitrificans

@Rhodanobacter\_Rhodanobacteraceae\_Xanthomonadales\_Gammaproteobacteria\_Proteobacteria\_Bacteria  
KZC21690:0.1298918186)100:0.0633115706,(Frateuria aurantia

@Frateuria\_Rhodanobacteraceae\_Xanthomonadales\_Gammaproteobacteria\_Proteobacteria\_Bacteria  
WP\_014402021:0.1726691660,Kerstesia gyiorum

@Kerstesia\_Alcaligenaceae\_Burkholderiales\_Betaproteobacteria\_Proteobacteria\_Bacteria  
WP\_068372127:0.1955028720)89:0.0537732315)89:0.0406607652)100:0.0722590092,Salpingoeca rosetta

@Salpingoeca\_Salpingoecidae\_Craspedida\_Choanoflagellida\_Eukaryota  
XP\_004990707:0.6233918526)82:0.0202512037,(Bradyrhizobium ottawaense

@Bradyrhizobium\_Bradyrhizobiaceae\_Rhizobiales\_Alphaproteobacteria\_Proteobacteria\_Bacteria  
SDJ18903:0.1768650508,Lutibaculum baratangense

@Lutibaculum\_Rhodobiaceae\_Rhizobiales\_Alphaproteobacteria\_Proteobacteria\_Bacteria  
WP\_023434261:0.2442457939)100:0.1097729051)78:0.0365718830)68:0.0355993567,(Tepidicaulis marinus

@Rhodobiaceae\_Rhizobiales\_Alphaproteobacteria\_Proteobacteria\_Bacteria WP\_045442100:0.3256447440,Tistrella  
mobilis @Tistrella\_Rhodospirillaceae\_Rhodospirillales\_Alphaproteobacteria\_Proteobacteria\_Bacteria  
WP\_014743774:0.4041658958)93:0.0489399938)78:0.0397443947,((((((((((((((((((((Blastocrithidia sp. p57

@Blastocrithidia\_Trypanosomatidae\_Kinetoplastida\_Euglenozoa\_Eukaryota p57:0.0000028988,Blastocrithidia  
triatomae @Blastocrithidia\_Trypanosomatidae\_Kinetoplastida\_Euglenozoa\_Eukaryota  
triat:0.0040932462)100:0.2238484945,jaculum @Jaculum\_Trypanosomatidae\_Kinetoplastida\_Euglenozoa\_Eukaryota  
jac:0.3122261238)100:0.0778034010,(Taylorella asinigenitalis

@Taylorella\_Alcaligenaceae\_Burkholderiales\_Betaproteobacteria\_Proteobacteria\_Bacteria  
WP\_014111929:0.0250347262,Taylorella equigenitalis

@Taylorella\_Alcaligenaceae\_Burkholderiales\_Betaproteobacteria\_Proteobacteria\_Bacteria  
WP\_013521500:0.0318887682)100:0.1708793003)100:0.2338595704,(Capnocytophaga stomatis

@Capnocytophaga\_Flavobacteriaceae\_Flavobacteriales\_Flavobacteriia\_Bacteroidetes\_Bacteria  
WP\_095894878:0.1891134948,Sulfurimonas hongkongensis

@Sulfurimonas\_Helicobacteraceae\_Campylobacteriales\_Epsilonproteobacteria\_Proteobacteria\_Bacteria  
WP\_021286763:0.1566576725)96:0.0143172098)55:0.0165889341,(((Aequorivita vladivostokensis

@Aequorivita\_Flavobacteriaceae\_Flavobacteriales\_Flavobacteriia\_Bacteroidetes\_Bacteria  
WP\_045080179:0.0039741798,Vitellibacter aquimaris

@Aequorivita\_Flavobacteriaceae\_Flavobacteriales\_Flavobacteriia\_Bacteroidetes\_Bacteria  
WP\_062619759:0.0000029503)100:0.0450666232,(Arenibacter certesii

@Arenibacter\_Flavobacteriaceae\_Flavobacteriales\_Flavobacteriia\_Bacteroidetes\_Bacteria  
WP\_026815260:0.0444340687,((Bizionia argentinensis

@Bizionia\_Flavobacteriaceae\_Flavobacteriales\_Flavobacteriia\_Bacteroidetes\_Bacteria  
WP\_008639015:0.0291914642,Xanthomarina gelatinilytica

@Xanthomarina\_Flavobacteriaceae\_Flavobacteriales\_Flavobacteriia\_Bacteroidetes\_Bacteria  
WP\_007649750:0.0541186531)100:0.0297716218,Gelidibacter mesophilus

@Gelidibacter\_Flavobacteriaceae\_Flavobacteriales\_Flavobacteriia\_Bacteroidetes\_Bacteria  
WP\_027126534:0.0447644404)100:0.0225184370)99:0.0215101354)99:0.0506582522,Chryseobacterium antarcticum

@Chryseobacterium\_Flavobacteriaceae\_Flavobacteriales\_Flavobacteriia\_Bacteroidetes\_Bacteria  
WP\_034719812:0.1131102570)100:0.1116262666,Flavobacterium chilense

@Flavobacterium\_Flavobacteriaceae\_Flavobacteriales\_Flavobacteriia\_Bacteroidetes\_Bacteria  
WP\_068843279:0.1786308328)99:0.0850431304)76:0.0240625632,((((((((((((Aliicoccus persicus

@Aliicoccus\_Staphylococcaceae\_Bacillales\_Bacilli\_Firmicutes\_Bacteria WP\_091475516:0.0497224735,Jeotgalicoccus  
halophilus @Jeotgalicoccus\_Staphylococcaceae\_Bacillales\_Bacilli\_Firmicutes\_Bacteria  
WP\_092599508:0.0459142468)100:0.0212121395,Nosocomiicoccus massiliensis

@Nosocomiicoccus\_Staphylococcaceae\_Bacillales\_Bacilli\_Firmicutes\_Bacteria  
WP\_102167606:0.1391986624)99:0.0270181566,Salinicoccus kekensis

@Salinicoccus\_Staphylococcaceae\_Bacillales\_Bacilli\_Firmicutes\_Bacteria  
SOC42587:0.0722364716)100:0.0650543874,(Macrococcus canis

@Macrococcus\_Staphylococcaceae\_Bacillales\_Bacilli\_Firmicutes\_Bacteria  
WP\_086041522:0.0733340775,(Mycobacterium abscessus @Mycobacteroides  
abscessus\_Mycobacteriaceae\_Corynebacteriales\_Actinobacteria\_Bacteria SKR87466:0.0655106771,Staphylococcus  
aureus @Staphylococcus\_Staphylococcaceae\_Bacillales\_Bacilli\_Firmicutes\_Bacteria  
WP\_031870206:0.0223762354)100:0.1176482749)100:0.0560614891)63:0.0261561834,Auricoccus indicus

@Bacillales\_Bacilli\_Firmicutes\_Bacteria WP\_077141107:0.1814075237)100:0.1335929611,((((Bacillus cecembensis

@Bacillus\_Bacillaceae\_Bacillales\_Bacilli\_Firmicutes\_Bacteria WP\_057988386:0.0588964964,Kurthia huakuii

@Kurthia\_Planococcaceae\_Bacillales\_Bacilli\_Firmicutes\_Bacteria  
WP\_029497661:0.0717010704)100:0.0231807256,(Caryophanon tenue

@Caryophanon\_Planococcaceae\_Bacillales\_Bacilli\_Firmicutes\_Bacteria WP\_066546585:0.0705148005,Solibacillus  
silvestris @Solibacillus\_Planococcaceae\_Bacillales\_Bacilli\_Firmicutes\_Bacteria  
WP\_014824979:0.0000021535)100:0.0280276381)100:0.1247344940,((Bacillus ndiopicus

@Bacillus\_Bacillaceae\_Bacillales\_Bacilli\_Firmicutes\_Bacteria WP\_042470300:0.1032039410,Lysinibacillus contaminans

@Lysinibacillus\_Bacillaceae\_Bacillales\_Bacilli\_Firmicutes\_Bacteria  
WP\_053585603:0.0531496339)59:0.0095521803,Ureibacillus thermosphaericus

@Ureibacillus\_Planococcaceae\_Bacillales\_Bacilli\_Firmicutes\_Bacteria  
WP\_016837596:0.1666978400)100:0.0222074143)95:0.0208371435,Rummeliibacillus pycnus

@Rummeliibacillus\_Planococcaceae\_Bacillales\_Bacilli\_Firmicutes\_Bacteria  
WP\_102693306:0.1378232970)87:0.0562264795)89:0.0255124715,(((Bacillus coagulans

@Bacillus\_Bacillaceae\_Bacillales\_Bacilli\_Firmicutes\_Bacteria KYC65640:0.0542178945,Tuberibacillus calidus

@Tuberibacillus\_Sporolactobacillaceae\_Bacillales\_Bacilli\_Firmicutes\_Bacteria  
WP\_027724119:0.0446898284)100:0.0397601163,Oceanobacillus caeni @Bacillales\_Bacilli\_Firmicutes\_Bacteria  
WP\_047183650:0.1120592425)92:0.0230132842,(Ornithinibacillus scapharcae

@Ornithinibacillus\_Bacillaceae\_Bacillales\_Bacilli\_Firmicutes\_Bacteria WP\_010098093:0.0342634360,Paucisalibacillus  
globulus @Paucisalibacillus\_Bacillaceae\_Bacillales\_Bacilli\_Firmicutes\_Bacteria  
WP\_096270964:0.0663081481)100:0.0493635513)100:0.1048910366)91:0.0263141674,(Bacillus massilioanorexius

@Bacillus\_Bacillaceae\_Bacillales\_Bacilli\_Firmicutes\_Bacteria WP\_019240222:0.0765093605,Veillonella dispar

@Veillonella\_Veillonellaceae\_Veillonellales\_Negativicutes\_Firmicutes\_Bacteria  
WP\_005385023:0.3224277245)97:0.0666996282)32:0.0048052985,Natribacillus halophilus

@Natribacillus\_Bacillaceae\_Bacillales\_Bacilli\_Firmicutes\_Bacteria  
SDI81044:0.2046119084)79:0.0370044326,(((Lysinibacillus sphaericus

@Lysinibacillus\_Bacillaceae\_Bacillales\_Bacilli\_Firmicutes\_Bacteria WP\_075527803:0.1452537207,Psychrobacillus  
psychrotolerans @Psychrobacillus\_Bacillaceae\_Bacillales\_Bacilli\_Firmicutes\_Bacteria  
WP\_093534569:0.1256578936)70:0.0195290734,Virgibacillus halodenitrificans

@Virgibacillus\_Bacillaceae\_Bacillales\_Bacilli\_Firmicutes\_Bacteria  
WP\_060681902:0.0426012043)100:0.0287452146,Sporosarcina ureae

@Sporosarcina\_Planococcaceae\_Bacillales\_Bacilli\_Firmicutes\_Bacteria  
WP\_037561528:0.1404570178)100:0.0355584923)81:0.0208512552,((((Fermentimonas caenicola

@Fermentimonas\_Porphyrimonadaceae\_Bacteroidales\_Bacteroidia\_Bacteroidetes\_Bacteria  
WP\_045088851:0.0000023247,Lascolabacillus massiliensis

@Lascolabacillus\_Porphyrimonadaceae\_Bacteroidales\_Bacteroidia\_Bacteroidetes\_Bacteria  
WP\_053826857:0.0000028226)100:0.0257559679,Proteiniphilum acetatigenes

@Proteiniphilum\_Dysgonamonadaceae\_Bacteroidales\_Bacteroidia\_Bacteroidetes\_Bacteria  
WP\_019538794:0.0495137978)100:0.0236433782,Petrimonas mucosa

@Petrimonas\_Porphyrimonadaceae\_Bacteroidales\_Bacteroidia\_Bacteroidetes\_Bacteria  
WP\_071137235:0.0183553953)100:0.0462853092,Ignatzschineria larvae

@Ignatzschineria\_Gammaproteobacteria\_Proteobacteria\_Bacteria  
WP\_026879052:0.1925459453)100:0.0264707717,Sphaerochaeta globosa

@Sphaerochaeta\_Spirochaetaceae\_Spirochaetales\_Spirochaetes\_Bacteria  
WP\_013607196:0.3518358754)95:0.0363971268)43:0.0194027437)44:0.0133175733,((((((((Actinomyces oris

@Actinomyces\_Actinomycetaceae\_Actinomycetales\_Actinobacteria\_Bacteria  
WP\_065362056:0.1888646444,Luteococcus japonicus

@Luteococcus\_Propionibacteriaceae\_Propionibacteriales\_Actinobacteria\_Bacteria  
WP\_094765957:0.1790738189)100:0.1377253790,(((Anaerococcus prevotii

@Anaerococcus\_Peptoniphilaceae\_Tissierellales\_Tissierellia\_Firmicutes\_Bacteria  
WP\_015777503:0.0581699185,Peptoniphilus timonensis

@Peptoniphilus\_Peptoniphilaceae\_Tissierellales\_Tissierellia\_Firmicutes\_Bacteria  
WP\_019138835:0.0774951900)100:0.1890738436,Ignavigranum ruoffiae

@Ignavigranum\_Aerococcaceae\_Lactobacillales\_Bacilli\_Firmicutes\_Bacteria  
WP\_092571913:0.1873574510)98:0.0521424552,Porphyrmonas bennonis

@Porphyromonas\_Porphyrmonadaceae\_Bacteroidales\_Bacteroidia\_Bacteroidetes\_Bacteria  
WP\_018107270:0.2444562847)93:0.0468876446)67:0.0305251558,Finegoldia magna

@Finegoldia\_Peptoniphilaceae\_Tissierellales\_Tissierellia\_Firmicutes\_Bacteria  
WP\_094206890:0.2234343980)74:0.0480511215,(((Anaerococcus vaginalis

@Anaerococcus\_Peptoniphilaceae\_Tissierellales\_Tissierellia\_Firmicutes\_Bacteria  
WP\_004839131:0.0432226427,Neofamilia massiliensis @Neofamilia\_Clostridiales\_Clostridia\_Firmicutes\_Bacteria  
WP\_054253000:0.0429381743)72:0.0134681656,Lagierella massiliensis

@Peptoniphilaceae\_Tissierellales\_Tissierellia\_Firmicutes\_Bacteria  
WP\_055078472:0.0194247783)71:0.0130180417,Ezakiella peruensis @Ezakiella\_Tissierellia\_Firmicutes\_Bacteria  
WP\_099950882:0.0694442759)100:0.2429533798)73:0.0185793036,((Aerococcus suis

@Aerococcus\_Aerococcaceae\_Lactobacillales\_Bacilli\_Firmicutes\_Bacteria  
WP\_084099345:0.1696847992,Tetragenococcus muriaticus

@Tetragenococcus\_Enterococcaceae\_Lactobacillales\_Bacilli\_Firmicutes\_Bacteria  
WP\_028789464:0.0764336662)100:0.0830307568,Alloiococcus otitis

@Alloiococcus\_Carnobacteriaceae\_Lactobacillales\_Bacilli\_Firmicutes\_Bacteria  
WP\_003778169:0.1873921111)95:0.0899730660)62:0.0155607089,Dehalobacterium formicoaceticum

@Dehalobacterium\_Peptococcaceae\_Clostridiales\_Clostridia\_Firmicutes\_Bacteria  
WP\_089609705:0.1451609584)94:0.0381900632,Streptococcus didelphis

@Streptococcus\_Streptococcaceae\_Lactobacillales\_Bacilli\_Firmicutes\_Bacteria  
WP\_018366408:0.1872860825)99:0.0296960912,(Methanosarcina flavescens

@Methanosarcina\_Methanosarcinaceae\_Methanosarcinales\_Methanomicrobia\_Euryarchaeota\_Archaea  
WP\_054298813:0.0825639797,(Proteocatella sphenisci

@Proteocatella\_Peptostreptococcaceae\_Clostridiales\_Clostridia\_Firmicutes\_Bacteria  
WP\_051188457:0.0526408873,Tissierella creatinophila

@Tissierella\_Tissierellaceae\_Tissierellales\_Tissierellia\_Firmicutes\_Bacteria  
WP\_075726643:0.1134675803)100:0.0790421079)100:0.0435043558)84:0.0324943108,Peptococcus niger

@Peptococcus\_Peptococcaceae\_Clostridiales\_Clostridia\_Firmicutes\_Bacteria  
WP\_091791229:0.2110739892)100:0.0901339581)95:0.0589399317,Mesotoga prima

@Mesotoga\_Kosmotogaceae\_Kosmotogales\_Thermotogae\_Bacteria  
WP\_014729999:0.1032517841)80:0.0130116113,Brevibacillus panacihumi

@Brevibacillus\_Paenibacillaceae\_Bacillales\_Bacilli\_Firmicutes\_Bacteria  
WP\_023558005:0.1369335102)81:0.0071833380,(((Desulfitobacterium dichloroeliminans

@Desulfitobacterium\_Peptococcaceae\_Clostridiales\_Clostridia\_Firmicutes\_Bacteria  
WP\_015261510:0.0735559860,Methanomethylovorans hollandica

@Methanomethylovorans\_Methanosarcinaceae\_Methanosarcinales\_Methanomicrobia\_Euryarchaeota\_Archaea  
WP\_015325093:0.0906532156)79:0.0151135135,Miniphocibacter massiliensis

@Miniphocibacter\_Peptoniphilaceae\_Tissierellales\_Tissierellia\_Firmicutes\_Bacteria  
WP\_100066157:0.3610929681)53:0.0196180261,(Desulfotomaculum aeronauticum

@Desulfotomaculum\_Peptococcaceae\_Clostridiales\_Clostridia\_Firmicutes\_Bacteria  
WP\_072914854:0.0497930409,Succinispira mobilis

@Succinispira\_Acidaminococcaceae\_Acidaminococcales\_Negativicutes\_Firmicutes\_Bacteria  
WP\_019879827:0.1353894537)79:0.0091346530)66:0.0129339511)66:0.0143134398,((Brevefilum fermentans

@Brevefilum\_Anaerolineaceae\_Anaerolineales\_Anaerolineae\_Chloroflexi\_Bacteria  
WP\_087861573:0.1085535000,Levilinea saccharolytica

@Levilinea\_Anaerolineaceae\_Anaerolineales\_Anaerolineae\_Chloroflexi\_Bacteria

WP\_062419119:0.0564209093)100:0.0283675863,Methanofollis liminatans  
@Methanofollis\_Methanomicrobiaceae\_Methanomicrobiales\_Methanomicrobia\_Euryarchaeota\_Archaea  
WP\_004039435:0.0988908401)100:0.0647177833)97:0.0233600023,((((Novymonas esmeraldas  
@Novymonas\_Trypanosomatidae\_Kinetoplastida\_Euglenozoa\_Eukaryota ANJ89233:0.0582480944,(((Leptomonas  
pyrrhocoris @Leptomonas\_Leishmaniinae\_Trypanosomatidae\_Kinetoplastida\_Euglenozoa\_Eukaryota  
XP\_015656182:0.0378107848,Crithidia bombi  
@Crithidia\_Leishmaniinae\_Trypanosomatidae\_Kinetoplastida\_Euglenozoa\_Eukaryota  
cbom:0.0879193281)95:0.0142676505,Leptomonas seymouri  
@Leptomonas\_Leishmaniinae\_Trypanosomatidae\_Kinetoplastida\_Euglenozoa\_Eukaryota  
KPI89353:0.0885137957)92:0.0197396085,(((Lotmaria passim  
@Lotmaria\_Leishmaniinae\_Trypanosomatidae\_Kinetoplastida\_Euglenozoa\_Eukaryota Ipas:0.0553465761,(Crithidia  
brevicula @Crithidia\_Leishmaniinae\_Trypanosomatidae\_Kinetoplastida\_Euglenozoa\_Eukaryota  
ANJ89235:0.0333763363,Crithidia thermophila  
@Crithidia\_Leishmaniinae\_Trypanosomatidae\_Kinetoplastida\_Euglenozoa\_Eukaryota  
ANJ89234:0.0664633266)100:0.0317160545)100:0.0271287706,Crithidia mellificae  
@Crithidia\_Leishmaniinae\_Trypanosomatidae\_Kinetoplastida\_Euglenozoa\_Eukaryota  
cmel:0.0207400574)93:0.0103341547,Crithidia fasciculata  
@Crithidia\_Leishmaniinae\_Trypanosomatidae\_Kinetoplastida\_Euglenozoa\_Eukaryota  
cfas:0.0270345862)89:0.0112766145,Crithidia acanthocephali  
@Crithidia\_Leishmaniinae\_Trypanosomatidae\_Kinetoplastida\_Euglenozoa\_Eukaryota  
caca:0.0000024489)96:0.0297215541)100:0.0969569255)100:0.0892873903,(((Brachyspira alvinipulli  
@Brachyspira\_Brachyspiraceae\_Brachyspirales\_Spirochaetes\_Bacteria WP\_028329494:0.0245952951,Brachyspira  
murdochii @Brachyspira\_Brachyspiraceae\_Brachyspirales\_Spirochaetes\_Bacteria  
WP\_104619231:0.0088163209)100:0.0166880855,Brachyspira innocens  
@Brachyspira\_Brachyspiraceae\_Brachyspirales\_Spirochaetes\_Bacteria  
WP\_020003575:0.0048580455)100:0.0226507990,(Brachyspira intermedia  
@Brachyspira\_Brachyspiraceae\_Brachyspirales\_Spirochaetes\_Bacteria AEM21566:0.0058558510,Brachyspira pilosicoli  
@Brachyspira\_Brachyspiraceae\_Brachyspirales\_Spirochaetes\_Bacteria  
WP\_013243239:0.0108092900)100:0.0084074423)99:0.0044311768,Brachyspira hamptonii  
@Brachyspira\_Brachyspiraceae\_Brachyspirales\_Spirochaetes\_Bacteria  
WP\_008726147:0.0058844101)100:0.1639591067)100:0.1283309581,(((Bacteroides barnesiae  
@Bacteroides\_Bacteroidaceae\_Bacteroidales\_Bacteroidia\_Bacteroidetes\_Bacteria  
WP\_025892754:0.0310153121,Mediterranea massiliensis  
@Mediterranea\_Bacteroidaceae\_Bacteroidales\_Bacteroidia\_Bacteroidetes\_Bacteria  
WP\_072546537:0.0276883909)100:0.0684985759,Porphyromonas cangingivalis  
@Porphyromonas\_Porphyromonadaceae\_Bacteroidales\_Bacteroidia\_Bacteroidetes\_Bacteria  
WP\_036850591:0.0609312032)100:0.0521346478,(Chromobacterium vaccinii  
@Chromobacterium\_Chromobacteriaceae\_Neisseriales\_Betaproteobacteria\_Proteobacteria\_Bacteria  
WP\_046166820:0.0070125286,Pseudogulbenkiania ferrooxidans  
@Pseudogulbenkiania\_Chromobacteriaceae\_Neisseriales\_Betaproteobacteria\_Proteobacteria\_Bacteria  
WP\_021478981:0.0100361174)100:0.1415099621)94:0.0193643755)74:0.0298723847,Akkermansia muciniphila  
@Akkermansia\_Akkermansiaceae\_Verrucomicrobiales\_Verrucomicrobiae\_Verrucomicrobia\_Bacteria  
WP\_102712127:0.1751904834)26:0.0098258769,((((Alistipes obesi  
@Rikenellaceae\_Bacteroidales\_Bacteroidia\_Bacteroidetes\_Bacteria WP\_019129622:0.1530478834,((Coprobacter  
secundus @Coprobacter\_Barnesiellaceae\_Bacteroidales\_Bacteroidia\_Bacteroidetes\_Bacteria  
WP\_044229047:0.0000028009,Gabonia massiliensis  
@Gabonia\_Porphyromonadaceae\_Bacteroidales\_Bacteroidia\_Bacteroidetes\_Bacteria  
WP\_055100169:0.0040461564)100:0.1199006360,(Gabonibacter massiliensis  
@Gabonibacter\_Porphyromonadaceae\_Bacteroidales\_Bacteroidia\_Bacteroidetes\_Bacteria



WP\_059026437:0.0040711272,Sanguibacteroides justesenii  
@Sanguibacteroides\_Porphryomonadaceae\_Bacteroidales\_Bacteroidia\_Bacteroidetes\_Bacteria  
WP\_041504213:0.0000029332)100:0.0916053116)100:0.0647932103)100:0.0584378031,Bacteroides fragilis  
@Bacteroides\_Bacteroidaceae\_Bacteroidales\_Bacteroidia\_Bacteroidetes\_Bacteria  
WP\_032543326:0.0504711844)96:0.0385563829,Parabacteroides distasonis  
@Parabacteroides\_Tannerellaceae\_Bacteroidales\_Bacteroidia\_Bacteroidetes\_Bacteria  
WP\_057328702:0.0780843792)100:0.0486343854,(Faecalibacterium prausnitzii  
@Faecalibacterium\_Ruminococcaceae\_Clostridiales\_Clostridia\_Firmicutes\_Bacteria  
WP\_055205053:0.1407572687,(Millionella massiliensis  
@Millionella\_Rikenellaceae\_Bacteroidales\_Bacteroidia\_Bacteroidetes\_Bacteria WP\_071133620:0.0264252289,Rikenella  
microfusum @Rikenella\_Rikenellaceae\_Bacteroidales\_Bacteroidia\_Bacteroidetes\_Bacteria  
WP\_037291894:0.0662140890)100:0.0821638153)100:0.0321927420)100:0.0671598840,(Desulfuromonas acetexigens  
@Desulfuromonas\_Desulfuromonadaceae\_Desulfuromonadales\_Deltaproteobacteria\_Proteobacteria\_Bacteria  
WP\_092054230:0.0610222887,Pelobacter acetylenicus  
@Pelobacter\_Desulfuromonadaceae\_Desulfuromonadales\_Deltaproteobacteria\_Proteobacteria\_Bacteria  
WP\_072285874:0.1032701455)100:0.1031280705)98:0.0317292030,((((((((((((Anaeocolumna xylanovorans  
@Anaeocolumna\_Lachnospiraceae\_Clostridiales\_Clostridia\_Firmicutes\_Bacteria  
WP\_073587377:0.0499408195,(Cellulosilyticum lentocellum  
@Cellulosilyticum\_Lachnospiraceae\_Clostridiales\_Clostridia\_Firmicutes\_Bacteria  
WP\_013655203:0.0132188903,Lachnoclostridium phytofermentans  
@Lachnospiraceae\_Clostridiales\_Clostridia\_Firmicutes\_Bacteria  
WP\_029505074:0.0327077123)95:0.0320226931)87:0.0327833505,((Anaerosphaera aminiphila  
@Anaerosphaera\_Peptoniphilaceae\_Tissierellales\_Tissierellia\_Firmicutes\_Bacteria  
WP\_073183221:0.1134603818,((Catabacter hongkongensis  
@Catabacter\_Catabacteriaceae\_Clostridiales\_Clostridia\_Firmicutes\_Bacteria  
WP\_046443954:0.0624594923,Robinsoniella peoriensis  
@Robinsoniella\_Lachnospiraceae\_Clostridiales\_Clostridia\_Firmicutes\_Bacteria  
WP\_047832716:0.0735570771)96:0.0365053220,(Clostridium termitidis  
@Ruminiclostridium\_Hungateiclostridiaceae\_Clostridiales\_Clostridia\_Firmicutes\_Bacteria  
WP\_004624845:0.0711250052,Sphaerochaeta coccoides  
@Sphaerochaeta\_Spirochaetaceae\_Spirochaetales\_Spirochaetes\_Bacteria  
WP\_013738892:0.0742088349)72:0.0000023554)94:0.0215103094)86:0.0369416267,Treponema brennaborensis  
@Treponema\_Spirochaetaceae\_Spirochaetales\_Spirochaetes\_Bacteria  
WP\_013757552:0.0605935407)100:0.0500758940)100:0.0598305179,Blautia hominis  
@Blautia\_Lachnospiraceae\_Clostridiales\_Clostridia\_Firmicutes\_Bacteria  
WP\_095174123:0.0684137447)91:0.0345485395,Bittarella massiliensis  
@Bittarella\_Ruminococcaceae\_Clostridiales\_Clostridia\_Firmicutes\_Bacteria  
WP\_059004798:0.0917002776)97:0.0302452492,((Eisenbergiella massiliensis  
@Eisenbergiella\_Lachnospiraceae\_Clostridiales\_Clostridia\_Firmicutes\_Bacteria WP\_102288670:0.0454387430,Neglecta  
timonensis @Neglecta\_Ruminococcaceae\_Clostridiales\_Clostridia\_Firmicutes\_Bacteria  
WP\_066864481:0.0273940205)100:0.0227510028,Hungatella hathewayi  
@Hungatella\_Clostridiaceae\_Clostridiales\_Clostridia\_Firmicutes\_Bacteria  
WP\_055652667:0.1408260547)97:0.0174589979)99:0.0519957534,(Anaeromassilibacillus senegalensis  
@Anaeromassilibacillus\_Ruminococcaceae\_Clostridiales\_Clostridia\_Firmicutes\_Bacteria  
WP\_050699064:0.0531842157,Bariatricus massiliensis  
@Bariatricus\_Lachnospiraceae\_Clostridiales\_Clostridia\_Firmicutes\_Bacteria  
WP\_066733821:0.0974098959)83:0.0000027895)99:0.0456685735,Methanomassiliicoccus intestinalis  
@Methanomassiliicoccus\_Methanomassiliicoccaceae\_Methanomassiliicoccales\_Thermoplasmata\_Euryarchaeota\_Archaea  
WP\_102030401:0.0595347747)100:0.1209332811,(Christensenella timonensis

@Christensenella\_Christensenellaceae\_Clostridiales\_Clostridia\_Firmicutes\_Bacteria  
WP\_066649157:0.1303966906,Pygmaibacter massiliensis

@Pygmaibacter\_Ruminococcaceae\_Clostridiales\_Clostridia\_Firmicutes\_Bacteria  
WP\_102051103:0.3006047994)99:0.0159777718)100:0.1013731024,Anaerorhabdus furcosa

@Anaerorhabdus\_Bacteroidaceae\_Bacteroidales\_Bacteroidia\_Bacteroidetes\_Bacteria  
WP\_078712294:0.2375950392)100:0.0700766100,Methanocorpusculum parvum

@Methanocorpusculum\_Methanocorpusculaceae\_Methanomicrobiales\_Methanomicrobia\_Euryarchaeota\_Archaea  
WP\_095642576:0.1679164003)84:0.0358579694,(((Arabia massiliensis

@Arabia\_Eggerthellaceae\_Eggerthellales\_Coriobacteriia\_Actinobacteria\_Bacteria  
WP\_080800673:0.0287778645,Gordonibacter massiliensis

@Gordonibacter\_Eggerthellaceae\_Eggerthellales\_Coriobacteriia\_Actinobacteria\_Bacteria  
WP\_080144252:0.0353819253)85:0.0257405238,Clostridioides difficile

@Clostridioides\_Peptostreptococcaceae\_Clostridiales\_Clostridia\_Firmicutes\_Bacteria  
EQ16178:0.0220557788)48:0.0117882714,Eggerthella timonensis

@Eggerthella\_Eggerthellaceae\_Eggerthellales\_Coriobacteriia\_Actinobacteria\_Bacteria  
WP\_101721206:0.0267580178)61:0.0378441084,Raoultibacter massiliensis

@Raoultibacter\_Eggerthellaceae\_Eggerthellales\_Coriobacteriia\_Actinobacteria\_Bacteria  
WP\_102375673:0.0902431237)100:0.2269796465)74:0.0431248077,Methanomethylophilus alvus @Candidatus  
Methanomethylophilus\_Methanomassiliococcaceae\_Methanomassiliococcales\_Thermoplasmata\_Euryarchaeota\_Archaea  
a WP\_048097703:0.2183142471)100:0.1683990615)26:0.0094722523)90:0.0189718260)97:0.0297587789,Chrysiogenes  
arsenatis @Chrysiogenes\_Chrysiogenaceae\_Chrysiogenales\_Chrysiogenetes\_Bacteria  
WP\_027389929:0.0908786495)86:0.0167453002,Methanothrix soehngeni

@Methanothrix\_Methanotrichaceae\_Methanosarcinales\_Methanomicrobia\_Stenosarchaea  
group\_Euryarchaeota\_Archaea WP\_013718126:0.1417812823)94:0.0118257070,(((Brocadia sinica @Candidatus  
Brocadia\_Candidatus Brocadiaceae\_Candidatus Brocadiales\_Planctomycetia\_Planctomycetes\_Bacteria  
KXK25293:0.1591455729,(Desulfofaba hansenii

@Desulfofaba\_Desulfovibrionaceae\_Desulfovibrionales\_Deltaproteobacteria\_Proteobacteria\_Bacteria  
WP\_100390614:0.0748697274,Desulfovibrio frigidus

@Desulfovibrio\_Desulfovibrionaceae\_Desulfovibrionales\_Deltaproteobacteria\_Proteobacteria\_Bacteria  
WP\_031485507:0.1345249352)100:0.0315876121)100:0.0093179534,(Desulfovacula phenolica

@Desulfovacula\_Desulfovibrionaceae\_Desulfovibrionales\_Deltaproteobacteria\_Proteobacteria\_Bacteria  
WP\_092236874:0.1169165506,((Desulforegula conservatrix

@Desulforegula\_Desulfovibrionaceae\_Desulfovibrionales\_Deltaproteobacteria\_Proteobacteria\_Bacteria  
WP\_027358937:0.0771083760,Geobacter anodireducens

@Geobacter\_Geobacteraceae\_Desulphuromonadales\_Deltaproteobacteria\_Proteobacteria\_Bacteria  
WP\_066357887:0.1347745299)94:0.0255804397,(Desulfotalea psychrophila

@Desulfotalea\_Desulfovibrionaceae\_Desulfovibrionales\_Deltaproteobacteria\_Proteobacteria\_Bacteria  
WP\_011190244:0.1712737130,Scalindua brodae @Candidatus Scalindua\_Candidatus Brocadiaceae\_Candidatus  
Brocadiales\_Planctomycetia\_Planctomycetes\_Bacteria  
KHE93022:0.1331331398)97:0.0716252481)86:0.0156030603)81:0.0318845223)76:0.0169489042,(Pelobacter  
propionicus @Pelobacter\_Desulphuromonadaceae\_Desulphuromonadales\_Deltaproteobacteria\_Proteobacteria\_Bacteria  
WP\_011735807:0.0838350540,Syntrophobacter fumaroxidans

@Syntrophobacter\_Syntrophobacteraceae\_Syntrophobacteriales\_Deltaproteobacteria\_Proteobacteria\_Bacteria  
WP\_011698578:0.0653045150)100:0.0659612465)81:0.0114912278)85:0.0208548563,((Bilophila wadsworthia

@Bilophila\_Desulfovibrionaceae\_Desulfovibrionales\_Deltaproteobacteria\_Proteobacteria\_Bacteria  
WP\_029436121:0.1008569506,Desulfovibrio aminophilus

@Desulfovibrio\_Desulfovibrionaceae\_Desulfovibrionales\_Deltaproteobacteria\_Proteobacteria\_Bacteria  
WP\_027177109:0.1265318920)85:0.0501628979,(((Desulfobacter postgatei

@Desulfobacter\_Desulfovibrionaceae\_Desulfovibrionales\_Deltaproteobacteria\_Proteobacteria\_Bacteria

WP\_004071151:0.1197526589,Syntrophus aciditrophicus  
@Syntrophus\_Syntrophaceae\_Syntrophobacterales\_Deltaproteobacteria\_Proteobacteria\_Bacteria  
WP\_041585147:0.0572652042)98:0.0573152891,(Desulfobulbus elongatus  
@Desulfobulbus\_Desulfobulbaceae\_Desulfobacterales\_Deltaproteobacteria\_Proteobacteria\_Bacteria  
WP\_028317960:0.0871289918,Desulfomicrobium norvegicum  
@Desulfomicrobium\_Desulfomicrobiaceae\_Desulfovibrionales\_Deltaproteobacteria\_Proteobacteria\_Bacteria  
WP\_092194216:0.0283657498)98:0.0310470850)100:0.0197958532,Syntrophorhabdus aromaticivorans  
@Syntrophorhabdus\_Syntrophorhabdaceae\_Syntrophobacterales\_Deltaproteobacteria\_Proteobacteria\_Bacteria  
WP\_028895679:0.1414318537)54:0.0114210969)80:0.0141707612)89:0.0415026917,(((Achromobacter denitrificans  
@Achromobacter\_Alcaligenaceae\_Burkholderiales\_Betaproteobacteria\_Proteobacteria\_Bacteria  
WP\_088447726:0.2399774924,(((((((Acinetobacter albensis  
@Acinetobacter\_Moraxellaceae\_Pseudomonadales\_Gammaproteobacteria\_Proteobacteria\_Bacteria  
WP\_092718430:0.1463077446,(((Acinetobacter populi  
@Acinetobacter\_Moraxellaceae\_Pseudomonadales\_Gammaproteobacteria\_Proteobacteria\_Bacteria  
WP\_087619460:0.0679780296,Gallibacterium anatis  
@Gallibacterium\_Pasteurellaceae\_Pasteurellales\_Gammaproteobacteria\_Proteobacteria\_Bacteria  
WP\_039150242:0.0450682935)36:0.0183137508,Avibacterium gallinarum  
@Avibacterium\_Pasteurellaceae\_Pasteurellales\_Gammaproteobacteria\_Proteobacteria\_Bacteria  
WP\_103853672:0.0327509804)38:0.0167790680,(Chelonobacter oris  
@Chelonobacter\_Pasteurellaceae\_Pasteurellales\_Gammaproteobacteria\_Proteobacteria\_Bacteria  
WP\_034616271:0.0057264712,Pasteurella testudinis  
@Pasteurella\_Pasteurellaceae\_Pasteurellales\_Gammaproteobacteria\_Proteobacteria\_Bacteria  
WP\_084256723:0.0197880381)100:0.0321501365)82:0.0187414742)59:0.0031821477,(((Idiomarina indica  
@Idiomarina\_Idiomarinaceae\_Alteromonadales\_Gammaproteobacteria\_Proteobacteria\_Bacteria  
WP\_092592176:0.0956982226,Pseudoalteromonas haloplanktis  
@Pseudoalteromonas\_Pseudoalteromonadaceae\_Alteromonadales\_Gammaproteobacteria\_Proteobacteria\_Bacteria  
WP\_011328413:0.0695753150)100:0.0366531684,Psychrobacter urativorans  
@Psychrobacter\_Moraxellaceae\_Pseudomonadales\_Gammaproteobacteria\_Proteobacteria\_Bacteria  
WP\_062535327:0.0925148126)99:0.0310203509,Klebsiella quasipneumoniae  
@Klebsiella\_Enterobacteriaceae\_Enterobacterales\_Gammaproteobacteria\_Proteobacteria\_Bacteria  
WP\_101862728:0.1267731366)70:0.0156596476,Moraxella boevrei  
@Moraxella\_Moraxellaceae\_Pseudomonadales\_Gammaproteobacteria\_Proteobacteria\_Bacteria  
WP\_019519938:0.0956623562)58:0.0147608165,(Paenalcaligenes hominis  
@Paenalcaligenes\_Alcaligenaceae\_Burkholderiales\_Betaproteobacteria\_Proteobacteria\_Bacteria  
WP\_077733848:0.2134404487,(Snodgrassella alvi  
@Snodgrassella\_Neisseriaceae\_Neisseriales\_Betaproteobacteria\_Proteobacteria\_Bacteria  
WP\_100100401:0.2052617691,Suttonella ornithocola  
@Suttonella\_Cardiobacteriaceae\_Cardiobacteriales\_Gammaproteobacteria\_Proteobacteria\_Bacteria  
WP\_072577180:0.0767211595)57:0.0109309709)57:0.0076053670)83:0.0212647910)44:0.0045524694,(((Actinobacillus capsulatus @Actinobacillus\_Pasteurellaceae\_Pasteurellales\_Gammaproteobacteria\_Proteobacteria\_Bacteria  
WP\_018652786:0.0214742112,Simonsiella muelleri  
@Simonsiella\_Neisseriaceae\_Neisseriales\_Betaproteobacteria\_Proteobacteria\_Bacteria  
WP\_002641686:0.0355852339)100:0.0717719673,((Conchiformibius kuhniae  
@Conchiformibius\_Neisseriaceae\_Neisseriales\_Betaproteobacteria\_Proteobacteria\_Bacteria  
WP\_027009529:0.0464356570,Mannheimia varigena  
@Mannheimia\_Pasteurellaceae\_Pasteurellales\_Gammaproteobacteria\_Proteobacteria\_Bacteria  
WP\_025248258:0.0401503967)90:0.0211313211,Neisseria weaveri  
@Neisseriaceae\_Neisseriales\_Betaproteobacteria\_Proteobacteria\_Bacteria  
WP\_036494282:0.0379176937)34:0.0093934219)91:0.0318054598,Moraxella caviae

@Moraxella\_Moraxellaceae\_Pseudomonadales\_Gammaproteobacteria\_Proteobacteria\_Bacteria  
WP\_078276912:0.0646690874)43:0.0049880800,(((Aggregatibacter segnis  
@Aggregatibacter\_Pasteurellaceae\_Pasteurellales\_Gammaproteobacteria\_Proteobacteria\_Bacteria  
WP\_048750208:0.0175729757,Haemophilus influenzae  
@Haemophilus\_Pasteurellaceae\_Pasteurellales\_Gammaproteobacteria\_Proteobacteria\_Bacteria  
AAA20441:0.0238222884)100:0.0198915440,((Morococcus cerebrosus  
@Neisseriales\_Betaproteobacteria\_Proteobacteria\_Bacteria WP\_049225874:0.0000020787,Porphyrobacter  
donghaensis @Neisseria\_Neisseriaceae\_Neisseriales\_Betaproteobacteria\_Proteobacteria\_Bacteria  
WP\_060975515:0.0085904331)100:0.0273290529,Rodentibacter ratti  
@Rodentibacter\_Pasteurellaceae\_Pasteurellales\_Gammaproteobacteria\_Proteobacteria\_Bacteria  
WP\_077435008:0.0266385245)62:0.0130604495)98:0.0242656212,(Bergeriella denitrificans  
@Bergeriella\_Neisseriaceae\_Neisseriales\_Betaproteobacteria\_Proteobacteria\_Bacteria  
WP\_066077770:0.0350567666,Moraxella cuniculi  
@Moraxella\_Moraxellaceae\_Pseudomonadales\_Gammaproteobacteria\_Proteobacteria\_Bacteria  
WP\_076555797:0.0683554105)98:0.0343602493)87:0.0172463264)54:0.0082892006)89:0.0223757053,Stenoxybacter  
acetivorans @Stenoxybacter\_Neisseriaceae\_Neisseriales\_Betaproteobacteria\_Proteobacteria\_Bacteria  
WP\_037587031:0.1093140333)44:0.0106716658,(Haemophilus massiliensis  
@Haemophilus\_Pasteurellaceae\_Pasteurellales\_Gammaproteobacteria\_Proteobacteria\_Bacteria  
WP\_032108847:0.0258562600,Necropsobacter rosorum  
@Pasteurellaceae\_Pasteurellales\_Gammaproteobacteria\_Proteobacteria\_Bacteria  
WP\_032092002:0.0391795618)100:0.0934981399)84:0.0314414979,Lysobacter tolerans  
@Lysobacter\_Xanthomonadaceae\_Xanthomonadales\_Gammaproteobacteria\_Proteobacteria\_Bacteria  
WP\_076585075:0.1502531165)65:0.0000029980,((((Brachymonas chironomi  
@Brachymonas\_Comamonadaceae\_Burkholderiales\_Betaproteobacteria\_Proteobacteria\_Bacteria  
WP\_018715399:0.0330937967,Ottowia thiooxydans  
@Ottowia\_Comamonadaceae\_Burkholderiales\_Betaproteobacteria\_Proteobacteria\_Bacteria  
WP\_028601395:0.0992156329)94:0.0330980375,(Comamonas badia  
@Comamonas\_Comamonadaceae\_Burkholderiales\_Betaproteobacteria\_Proteobacteria\_Bacteria  
WP\_024539421:0.1118955930,(Methylobacillus rhizosphaerae  
@Methylobacillus\_Methylophilaceae\_Nitrosomonadales\_Betaproteobacteria\_Proteobacteria\_Bacteria  
WP\_089374667:0.0409031731,Thauera butanivorans  
@Thauera\_Zoogloeaceae\_Rhodocyclales\_Betaproteobacteria\_Proteobacteria\_Bacteria  
WP\_068639643:0.0464917459)57:0.0049035177)61:0.0153645753)75:0.0453605902,Halomonas halocynthiae  
@Halomonas\_Halomonadaceae\_Oceanospirillales\_Gammaproteobacteria\_Proteobacteria\_Bacteria  
WP\_027966272:0.1775214463)100:0.0563834136,((((Marinobacter aromaticivorans  
@Marinobacter\_Alteromonadaceae\_Alteromonadales\_Gammaproteobacteria\_Proteobacteria\_Bacteria  
WP\_100688184:0.0183015274,Marinospirillum insulare  
@Marinospirillum\_Oceanospirillales\_Gammaproteobacteria\_Proteobacteria\_Bacteria  
WP\_027851800:0.0277898974)100:0.0212946209,Pseudorhodobacter aquimaris  
@Pseudorhodobacter\_Rhodobacteraceae\_Rhodobacterales\_Alphaproteobacteria\_Proteobacteria\_Bacteria  
WP\_050525797:0.0470436244)100:0.1509855146,Sphingomonas histidinilytica  
@Sphingomonadaceae\_Sphingomonadales\_Alphaproteobacteria\_Proteobacteria\_Bacteria  
WP\_079646465:0.0564248510)100:0.0294067779,(Sphingobium cloacae  
@Sphingobium\_Sphingomonadaceae\_Sphingomonadales\_Alphaproteobacteria\_Proteobacteria\_Bacteria  
WP\_066515242:0.0303662278,Sphingopyxis granuli  
@Sphingopyxis\_Sphingomonadaceae\_Sphingomonadales\_Alphaproteobacteria\_Proteobacteria\_Bacteria  
WP\_076074723:0.0230732006)98:0.0155765616)99:0.0309179230)99:0.0273331323,(((Lampropedia cohaerens  
@Lampropedia\_Comamonadaceae\_Burkholderiales\_Betaproteobacteria\_Proteobacteria\_Bacteria  
WP\_046740293:0.0459990358,Thermomonas fusca

@Thermomonas\_Xanthomonadaceae\_Xanthomonadales\_Gammaproteobacteria\_Proteobacteria\_Bacteria  
WP\_028838828:0.0526876340)100:0.0308060872,Luteimonas mephitis

@Luteimonas\_Xanthomonadaceae\_Xanthomonadales\_Gammaproteobacteria\_Proteobacteria\_Bacteria  
WP\_027081272:0.0332822989)96:0.0184660990,Xenophilus azovorans

@Xenophilus\_Comamonadaceae\_Burkholderiales\_Betaproteobacteria\_Proteobacteria\_Bacteria  
WP\_038216207:0.0357593568)100:0.0290982405)72:0.0153958369)99:0.0354456132,((((Bdellovibrio exovorans

@Bdellovibrio\_Bdellovibrionaceae\_Bdellovibrionales\_Oligoflexia\_Proteobacteria\_Bacteria  
WP\_015468947:0.0831651284,Berkiella aquae @Candidatus  
Berkiella\_Coxiellaceae\_Legionellales\_Gammaproteobacteria\_Proteobacteria\_Bacteria  
WP\_075066858:0.0302546872)100:0.1083726533,(Pseudomonas geniculata

@Xanthomonadaceae\_Xanthomonadales\_Gammaproteobacteria\_Proteobacteria\_Bacteria  
WP\_057502581:0.0404393846,Stenotrophomonas humi

@Stenotrophomonas\_Xanthomonadaceae\_Xanthomonadales\_Gammaproteobacteria\_Proteobacteria\_Bacteria  
WP\_057635794:0.0692896434)100:0.1796830798)86:0.0176324232,Lysobacter enzymogenes

@Lysobacter\_Xanthomonadaceae\_Xanthomonadales\_Gammaproteobacteria\_Proteobacteria\_Bacteria  
WP\_096377497:0.1230338317)81:0.0314383401,Novosphingobium rosa

@Novosphingobium\_Sphingomonadaceae\_Sphingomonadales\_Alphaproteobacteria\_Proteobacteria\_Bacteria  
WP\_068090466:0.1627545114)77:0.0026067918,Bordetella bronchialis

@Bordetella\_Alcaligenaceae\_Burkholderiales\_Betaproteobacteria\_Proteobacteria\_Bacteria  
WP\_066669734:0.1183152103)31:0.0058071929)98:0.0393730745)100:0.0722822968,(((((((Acidovorax caeni

@Acidovorax\_Comamonadaceae\_Burkholderiales\_Betaproteobacteria\_Proteobacteria\_Bacteria  
WP\_054257882:0.0420516808,Melaminivora alkalimesophila

@Melaminivora\_Comamonadaceae\_Burkholderiales\_Betaproteobacteria\_Proteobacteria\_Bacteria  
WP\_019373065:0.0131720436)100:0.0092731700,Diaphorobacter polyhydroxybutyratorans

@Diaphorobacter\_Comamonadaceae\_Burkholderiales\_Betaproteobacteria\_Proteobacteria\_Bacteria  
WP\_088886811:0.0303306751)100:0.0355367604,Comamonas composti

@Comamonas\_Comamonadaceae\_Burkholderiales\_Betaproteobacteria\_Proteobacteria\_Bacteria  
WP\_027014979:0.0595141421)100:0.0621103181,Delftia acidovorans

@Delftia\_Comamonadaceae\_Burkholderiales\_Betaproteobacteria\_Proteobacteria\_Bacteria  
WP\_012206071:0.0594795215)100:0.1179711972,Lampropedia hyalina

@Lampropedia\_Comamonadaceae\_Burkholderiales\_Betaproteobacteria\_Proteobacteria\_Bacteria  
WP\_073356838:0.0723775111)100:0.1142543937,(((((((Actinosynnema mirum

@Pseudonocardiaceae\_Pseudonocardiales\_Actinobacteria\_Bacteria WP\_015803151:0.1904733910,Umezawaea  
tangerina @Umezawaea\_Pseudonocardiaceae\_Pseudonocardiales\_Actinobacteria\_Bacteria  
WP\_106189435:0.0759253006)74:0.0255279362,(Cryptosporangium arvum

@Cryptosporangium\_Cryptosporangiaceae\_Frankiales\_Actinobacteria\_Bacteria WP\_035858008:0.1247797982,Lentzea  
albida @Lentzea\_Pseudonocardiaceae\_Pseudonocardiales\_Actinobacteria\_Bacteria  
WP\_089920021:0.1173654935)74:0.0420986371)100:0.0461531456,(Amycolatopsis jejuensis

@Amycolatopsis\_Pseudonocardiaceae\_Pseudonocardiales\_Actinobacteria\_Bacteria  
WP\_033288641:0.1221834266,Mycobacterium aquaticum

@Mycobacterium\_Mycobacteriaceae\_Corynebacteriales\_Actinobacteria\_Bacteria  
WP\_083165279:0.1254877821)100:0.0440695765)100:0.0449790325,(Knoellia sinensis

@Knoellia\_Intrasporangiaceae\_Micrococcales\_Actinobacteria\_Bacteria WP\_035918038:0.0557577049,Nocardioides  
jensenii @Nocardioides\_Nocardioidaceae\_Propionibacteriales\_Actinobacteria\_Bacteria  
WP\_067429896:0.0871581532)100:0.0426110921)100:0.0493825591,(Glycomyces fuscus

@Glycomyces\_Glycomycetaceae\_Glycomycetales\_Actinobacteria\_Bacteria WP\_097637414:0.0215303266,Nocardiopsis  
halotolerans @Nocardiopsis\_Nocardiopsaceae\_Streptosporangiales\_Actinobacteria\_Bacteria  
WP\_017571648:0.0497987867)100:0.0493527173)98:0.0121588361,Rhodococcus aetherivorans

@Rhodococcus\_Nocardiaceae\_Corynebacteriales\_Actinobacteria\_Bacteria

WP\_029546750:0.1605815430)99:0.0251267668,((Nakamurella lactea  
@Nakamurella\_Nakamurellaceae\_Nakamurellales\_Actinobacteria\_Bacteria  
WP\_029135493:0.0544420481,Streptomyces flavovirens  
@Streptomyces\_Streptomycetaceae\_Streptomycetales\_Actinobacteria\_Bacteria  
WP\_030638643:0.0880250927)100:0.0502710640,Ruania albidiflava  
@Ruania\_Ruaniaceae\_Micrococcales\_Actinobacteria\_Bacteria  
WP\_022916619:0.2389986871)100:0.0633921173)100:0.0432628513)100:0.0438244627,(((Marinobacter salexigens  
@Marinobacter\_Alteromonadaceae\_Alteromonadales\_Gammaproteobacteria\_Proteobacteria\_Bacteria  
WP\_100641148:0.0347997028,Marinospirillum minutulum  
@Marinospirillum\_Oceanospirillales\_Gammaproteobacteria\_Proteobacteria\_Bacteria  
WP\_027848265:0.0271056516)100:0.0358988968,(Oblitimonas alkaliphila  
@Oblitimonas\_Pseudomonadaceae\_Pseudomonadales\_Gammaproteobacteria\_Proteobacteria\_Bacteria  
WP\_053103017:0.0232942146,Thiopseudomonas denitrificans  
@Thiopseudomonas\_Pseudomonadaceae\_Pseudomonadales\_Gammaproteobacteria\_Proteobacteria\_Bacteria  
WP\_101497933:0.0489792709)100:0.0208112063)100:0.1226958023,Pseudomonas flexibilis  
@Pseudomonas\_Pseudomonadaceae\_Pseudomonadales\_Gammaproteobacteria\_Proteobacteria\_Bacteria  
WP\_039607332:0.1429870335)63:0.0147850970)63:0.0156870352,((((Arthrobacter castelli  
@Arthrobacter\_Micrococcaceae\_Micrococcales\_Actinobacteria\_Bacteria  
WP\_026817909:0.1113771958,Pseudonocardia ammonioxydans  
@Pseudonocardia\_Pseudonocardiaceae\_Pseudonocardiales\_Actinobacteria\_Bacteria  
WP\_093339306:0.0319206997)99:0.0294700375,(Demetria terragena  
@Demetria\_Dermacoccaceae\_Micrococcales\_Actinobacteria\_Bacteria WP\_018157335:0.1847880646,Streptomyces  
antibioticus @Streptomyces\_Streptomycetaceae\_Streptomycetales\_Actinobacteria\_Bacteria  
WP\_059197686:0.0386545772)96:0.0271255079)68:0.0148178155,(Saccharomonospora azurea  
@Saccharomonospora\_Pseudonocardiaceae\_Pseudonocardiales\_Actinobacteria\_Bacteria  
WP\_005438011:0.0258574210,Saccharopolyspora antimicrobica  
@Saccharopolyspora\_Pseudonocardiaceae\_Pseudonocardiales\_Actinobacteria\_Bacteria  
WP\_093155793:0.0577320591)72:0.0243598463)74:0.0203530560,Pseudonocardia asaccharolytica  
@Pseudonocardia\_Pseudonocardiaceae\_Pseudonocardiales\_Actinobacteria\_Bacteria  
WP\_084795917:0.0715551250)49:0.0102417636,(((Intrasporangium calvum  
@Intrasporangium\_Intrasporangiaceae\_Micrococcales\_Actinobacteria\_Bacteria  
WP\_013494200:0.0653666904,(Kineosphaera limosa  
@Kineosphaera\_Dermatophilaceae\_Micrococcales\_Actinobacteria\_Bacteria WP\_006590879:0.1183798882,Piscicoccus  
intestinalis @Piscicoccus\_Dermatophilaceae\_Micrococcales\_Actinobacteria\_Bacteria  
WP\_068428505:0.0545591938)100:0.0645736213)100:0.0266949663,Tetrasphaera jenkinsii  
@Tetrasphaera\_Intrasporangiaceae\_Micrococcales\_Actinobacteria\_Bacteria  
WP\_048546513:0.2362648686)75:0.0460965321,(Rhodococcus maanshanensis  
@Rhodococcus\_Nocardiaceae\_Corynebacteriales\_Actinobacteria\_Bacteria WP\_072751139:0.0446896387,Tomitella  
biformata @Tomitella\_Corynebacteriales\_Actinobacteria\_Bacteria  
WP\_024793701:0.0764320260)100:0.0752329370)66:0.0313239734)100:0.0199766331,(Lysobacter defluvii  
@Lysobacter\_Xanthomonadaceae\_Xanthomonadales\_Gammaproteobacteria\_Proteobacteria\_Bacteria  
WP\_052106504:0.0935592571,Mycobacterium agri  
@Mycolicibacterium\_Mycobacteriaceae\_Corynebacteriales\_Actinobacteria\_Bacteria  
WP\_097940642:0.1922620570)100:0.0575274815)98:0.0333603725)63:0.0135297169)96:0.0319721242,(Amantichitinu  
m ursilacus @Amantichitinum\_Neisseriaceae\_Neisseriales\_Betaproteobacteria\_Proteobacteria\_Bacteria  
WP\_053936438:0.1539577350,Vibrio shilonii  
@Vibrio\_Vibrionaceae\_Vibrionales\_Gammaproteobacteria\_Proteobacteria\_Bacteria  
WP\_088878057:0.2958517304)97:0.0700493547)88:0.0254003566,((((Cohaesibacter gelatinilyticus  
@Cohaesibacteraceae\_Rhizobiales\_Alphaproteobacteria\_Proteobacteria\_Bacteria

WP\_097153957:0.0958174961,Kiloniella majae  
@Kiloniella\_Kiloniellaceae\_Kiloniellales\_Alphaproteobacteria\_Proteobacteria\_Bacteria  
WP\_085908742:0.1158703809)100:0.0283481395,((Phaeobacter gallaeciensis  
@Phaeobacter\_Rhodobacteraceae\_Rhodobacterales\_Alphaproteobacteria\_Proteobacteria\_Bacteria  
WP\_024096627:0.0226753140,Pseudovibrio ascidiaceicola  
@Pseudovibrio\_Rhodobacteraceae\_Rhodobacterales\_Alphaproteobacteria\_Proteobacteria\_Bacteria  
WP\_093521375:0.1519933348)93:0.0239035016,Ruegeria conchae  
@Ruegeria\_Rhodobacteraceae\_Rhodobacterales\_Alphaproteobacteria\_Proteobacteria\_Bacteria  
WP\_029622082:0.0664318471)93:0.0321625193)100:0.0412550829,(Dyadobacter fermentans  
@Dyadobacter\_Cytophagaceae\_Cytophagales\_Cytophagia\_Bacteroidetes\_Bacteria  
WP\_015811294:0.2169805854,Mucilaginibacter gossypicola  
@Mucilaginibacter\_Sphingobacteriaceae\_Sphingobacteriales\_Sphingobacteriia\_Bacteroidetes\_Bacteria  
WP\_091214188:0.0884028249)99:0.1347139920)85:0.0379465190,(Plesiomonas shigelloides  
@Plesiomonas\_unclassified\_Enterobacterales\_Enterobacterales\_Gammaproteobacteria\_Proteobacteria\_Bacteria  
WP\_039044974:0.1111944904,Shewanella woodyi  
@Shewanella\_Shewanellaceae\_Alteromonadales\_Gammaproteobacteria\_Proteobacteria\_Bacteria  
WP\_012326469:0.2865055125)96:0.1334403329)41:0.0061430968)51:0.0139859100)3:0.0086608080,((((((((Aequorivita  
a viscosa @Aequorivita\_Flavobacteriaceae\_Flavobacteriales\_Flavobacteriia\_Bacteroidetes\_Bacteria  
WP\_073219245:0.1217042923,(Brumimicrobium mesophilum  
@Brumimicrobium\_Crocinitomicaceae\_Flavobacteriales\_Flavobacteriia\_Bacteroidetes\_Bacteria  
WP\_107039984:0.0501030084,Salegentibacter echinorum  
@Salegentibacter\_Flavobacteriaceae\_Flavobacteriales\_Flavobacteriia\_Bacteroidetes\_Bacteria  
WP\_072875679:0.2968461594)100:0.0310321589)100:0.0822767299,Flavobacterium columnare  
@Flavobacterium\_Flavobacteriaceae\_Flavobacteriales\_Flavobacteriia\_Bacteroidetes\_Bacteria  
WP\_088399596:0.2066725364)100:0.0701379893,(Polaromonas naphthalenivorans  
@Polaromonas\_Comamonadaceae\_Burkholderiales\_Betaproteobacteria\_Proteobacteria\_Bacteria  
WP\_011802041:0.1004453352,Ramlibacter tataouinensis  
@Ramlibacter\_Comamonadaceae\_Burkholderiales\_Betaproteobacteria\_Proteobacteria\_Bacteria  
WP\_061502514:0.1901072262)100:0.0723850726)91:0.0210224889,(((Magnetofaba australis  
@Magnetofaba\_Magnetococcaceae\_Magnetococcales\_Alphaproteobacteria\_Proteobacteria\_Bacteria  
WP\_085442659:0.0978743931,Thioploca ingrica  
@Thioploca\_Thiotrichaceae\_Thiotrichales\_Gammaproteobacteria\_Proteobacteria\_Bacteria  
WP\_045474072:0.0737261314)100:0.0217226444,Sedimenticola sp.  
@Sedimenticola\_Gammaproteobacteria\_Proteobacteria\_Bacteria  
PLY16119:0.0449271506)100:0.0479225397,(Nitrosomonas marina  
@Nitrosomonas\_Nitrosomonadaceae\_Nitrosomonadales\_Betaproteobacteria\_Proteobacteria\_Bacteria  
WP\_090627803:0.1689538870,Thauera terpenica  
@Thauera\_Zoogloeaceae\_Rhodocyclales\_Betaproteobacteria\_Proteobacteria\_Bacteria  
WP\_021249038:0.0816542454)98:0.0516219482)97:0.0442386624)81:0.0056130627,((Kangiella geojedonensis  
@Kangiella\_Kangiellaceae\_Oceanospirillales\_Gammaproteobacteria\_Proteobacteria\_Bacteria  
WP\_046561806:0.1861639372,Methylophaga muralis  
@Methylophaga\_Piscirickettsiaceae\_Thiotrichales\_Gammaproteobacteria\_Proteobacteria\_Bacteria  
WP\_069295827:0.1358664686)81:0.0338631175,Psychromonas arctica  
@Psychromonas\_Psychromonadaceae\_Alteromonadales\_Gammaproteobacteria\_Proteobacteria\_Bacteria  
WP\_028867180:0.1522812826)88:0.0190607178)99:0.0427981582,Nitrosomonas europaea  
@Nitrosomonas\_Nitrosomonadaceae\_Nitrosomonadales\_Betaproteobacteria\_Proteobacteria\_Bacteria  
KXK47190:0.1036252430)26:0.0099523251,(Colwellia aestuarii  
@Colwellia\_Colwelliaceae\_Alteromonadales\_Gammaproteobacteria\_Proteobacteria\_Bacteria  
WP\_077288174:0.1829761799,Oceanisphaera profunda

@Oceanisphaera\_Aeromonadaceae\_Aeromonadales\_Gammaproteobacteria\_Proteobacteria\_Bacteria  
WP\_087037535:0.0846280461)94:0.0677940014)21:0.0114808953,(((Agarilytica rhodophyticola  
@Agarilytica\_Cellvibrionaceae\_Cellvibrionales\_Gammaproteobacteria\_Proteobacteria\_Bacteria  
WP\_086930740:0.1120906354,(Amphritea japonica  
@Amphritea\_Oceanospirillales\_Gammaproteobacteria\_Proteobacteria\_Bacteria  
WP\_019623314:0.1200668237,Marinobacterium jannaschii  
@Marinobacterium\_Oceanospirillales\_Gammaproteobacteria\_Proteobacteria\_Bacteria  
WP\_027857710:0.1327047135)99:0.0149638208)100:0.0585299291,((Methylotenera versatilis  
@Methylotenera\_Methylophilaceae\_Nitrosomonadales\_Betaproteobacteria\_Proteobacteria\_Bacteria  
WP\_013146757:0.0563639487,Propionivibrio  
@Propionivibrio\_Rhodocyclaceae\_Rhodocyclales\_Betaproteobacteria\_Proteobacteria\_Bacteria  
SBT06867:0.0742997570)99:0.0283736329,Novimethylophilus kurashikiensis  
@Novimethylophilus\_Methylophilaceae\_Nitrosomonadales\_Betaproteobacteria\_Proteobacteria\_Bacteria  
GBG15006:0.0599783599)98:0.0388395340)93:0.0048108067,((((Aliivibrio fischeri  
@Aliivibrio\_Vibrionaceae\_Vibrionales\_Gammaproteobacteria\_Proteobacteria\_Bacteria  
WP\_065604460:0.0086384669,((Moritella viscosa  
@Moritella\_Moritellaceae\_Alteromonadales\_Gammaproteobacteria\_Proteobacteria\_Bacteria  
WP\_075476635:0.0562517807,(Photobacterium swingsii  
@Photobacterium\_Vibrionaceae\_Vibrionales\_Gammaproteobacteria\_Proteobacteria\_Bacteria  
WP\_048900285:0.0128868812,Vibrio tapetis  
@Vibrio\_Vibrionaceae\_Vibrionales\_Gammaproteobacteria\_Proteobacteria\_Bacteria  
WP\_102522428:0.0455707755)99:0.0048159783)100:0.0604714868,Vibrio splendidus  
@Vibrio\_Vibrionaceae\_Vibrionales\_Gammaproteobacteria\_Proteobacteria\_Bacteria  
WP\_060980655:0.0188110160)32:0.0092937666,Photobacterium iliopiscarium  
@Photobacterium\_Vibrionaceae\_Vibrionales\_Gammaproteobacteria\_Proteobacteria\_Bacteria  
WP\_107237855:0.0415796717)100:0.0172976533)100:0.0632109085,(Photobacterium rosenbergii  
@Photobacterium\_Vibrionaceae\_Vibrionales\_Gammaproteobacteria\_Proteobacteria\_Bacteria  
WP\_107298421:0.0886286856,Vibrio rotiferianus  
@Vibrio\_Vibrionaceae\_Vibrionales\_Gammaproteobacteria\_Proteobacteria\_Bacteria  
WP\_071235047:0.0672190793)100:0.0912303562)100:0.0253167372,(Colwellia echini  
@Colwellia\_Colwelliaceae\_Alteromonadales\_Gammaproteobacteria\_Proteobacteria\_Bacteria  
WP\_101343171:0.1014776867,Pseudoalteromonas denitrificans  
@Pseudoalteromonas\_Pseudoalteromonadaceae\_Alteromonadales\_Gammaproteobacteria\_Proteobacteria\_Bacteria  
WP\_091984046:0.1177106776)100:0.0348120749)100:0.0329327239,(Contendobacter odensis @Candidatus  
Contendobacter\_Cometibacteraceae\_Gammaproteobacteria\_Proteobacteria\_Bacteria  
WP\_034437035:0.0552343441,Nitrospira japonica @Nitrospira\_Nitrospiraceae\_Nitrospirales\_Nitrospirae\_Bacteria  
WP\_080886730:0.1042100763)100:0.0445431056)58:0.0061550303,Insolitispirillum peregrinum  
@Insolitispirillum\_Rhodospirillaceae\_Rhodospirillales\_Alphaproteobacteria\_Proteobacteria\_Bacteria  
WP\_076400359:0.1147315775)95:0.0206760835)94:0.0275503007,Nitrosospira multiformis  
@Nitrosomonadaceae\_Nitrosomonadales\_Betaproteobacteria\_Proteobacteria\_Bacteria  
WP\_074631285:0.0640176131)89:0.0106300270)64:0.0191312617)55:0.0099176356,Herminiimonas arsenicoxydans  
@Herminiimonas\_Oxalobacteraceae\_Burkholderiales\_Betaproteobacteria\_Proteobacteria\_Bacteria  
WP\_011870712:0.1470256402)12:0.0100569064,(((Aromatoleum aromaticum  
@Aromatoleum\_Rhodocyclaceae\_Rhodocyclales\_Betaproteobacteria\_Proteobacteria\_Bacteria  
WP\_011237006:0.0877144107,Azotobacter chroococcum  
@Azotobacter\_Pseudomonadaceae\_Pseudomonadales\_Gammaproteobacteria\_Proteobacteria\_Bacteria  
WP\_039804619:0.0944003809)65:0.0480219642,Paraburkholderia oxyphila  
@Paraburkholderia\_Burkholderiaceae\_Burkholderiales\_Betaproteobacteria\_Proteobacteria\_Bacteria  
WP\_028220834:0.1212696257)37:0.0087790606,Sterolibacterium denitrificans



@Sterolibacterium\_Sterolibacteriaceae\_Nitrosomonadales\_Betaproteobacteria\_Proteobacteria\_Bacteria  
SMB24385:0.1201993481)25:0.0067596281)97:0.0341203573,((((((((((((((((Acidiphilium cryptum  
@Acidiphilium\_Acetobacteraceae\_Rhodospirillales\_Alphaproteobacteria\_Proteobacteria\_Bacteria  
WP\_011942027:0.0571008921,Acidisphaera rubrifaciens  
@Acidisphaera\_Acetobacteraceae\_Rhodospirillales\_Alphaproteobacteria\_Proteobacteria\_Bacteria  
WP\_048863196:0.0839736585)100:0.0514674304,Acidobacterium ailaui  
@Acidobacterium\_Acidobacteriaceae\_Acidobacteriales\_Acidobacteria\_Bacteria  
WP\_026442340:0.1270396641)86:0.0281321175,Acidocella aminolytica  
@Acidocella\_Acetobacteraceae\_Rhodospirillales\_Alphaproteobacteria\_Proteobacteria\_Bacteria  
WP\_048877987:0.1671379517)64:0.0181607562,Afipia broomeae  
@Afipia\_Bradyrhizobiaceae\_Rhizobiales\_Alphaproteobacteria\_Proteobacteria\_Bacteria  
PJJ38015:0.0990360238)76:0.0216245462,Sphingopyxis fribergensis  
@Sphingopyxis\_Sphingomonadaceae\_Sphingomonadales\_Alphaproteobacteria\_Proteobacteria\_Bacteria  
WP\_039575327:0.1790619425)100:0.0473266276,(Pseudoxanthomonas dokdonensis  
@Pseudoxanthomonas\_Xanthomonadaceae\_Xanthomonadales\_Gammaproteobacteria\_Proteobacteria\_Bacteria  
WP\_057657654:0.2586117192,Sphingomonas fennica  
@Sphingomonas\_Sphingomonadaceae\_Sphingomonadales\_Alphaproteobacteria\_Proteobacteria\_Bacteria  
WP\_107395276:0.1757569417)74:0.0782789327)74:0.0194824539,(Burkholderia cepacia @Burkholderia cepacia  
complex\_Burkholderia\_Burkholderiaceae\_Burkholderiales\_Betaproteobacteria\_Proteobacteria\_Bacteria  
WP\_060341185:0.0586602498,Paraburkholderia bannensis  
@Paraburkholderia\_Burkholderiaceae\_Burkholderiales\_Betaproteobacteria\_Proteobacteria\_Bacteria  
WP\_027820559:0.0256111114)100:0.1337346128)50:0.0137713988,(((Agrobacterium rhizogenes  
@Agrobacterium\_Rhizobium/Agrobacterium  
group\_Rhizobiaceae\_Rhizobiales\_Alphaproteobacteria\_Proteobacteria\_Bacteria  
WP\_034483796:0.0549961550,Rhizobium tropici @Rhizobium/Agrobacterium  
group\_Rhizobiaceae\_Rhizobiales\_Alphaproteobacteria\_Proteobacteria\_Bacteria  
WP\_047630520:0.0391106114)100:0.0676635251,Bordetella flabilis  
@Bordetella\_Alcaligenaceae\_Burkholderiales\_Betaproteobacteria\_Proteobacteria\_Bacteria  
WP\_066657172:0.0671695211)100:0.0139499685,Bradyrhizobium japonicum  
@Bradyrhizobium\_Bradyrhizobiaceae\_Rhizobiales\_Alphaproteobacteria\_Proteobacteria\_Bacteria  
WP\_049812976:0.1015482264)97:0.0710596791,Caulobacter flavus  
@Caulobacter\_Caulobacteraceae\_Caulobacteriales\_Alphaproteobacteria\_Proteobacteria\_Bacteria  
WP\_101713452:0.1384525788)97:0.0362135011,(Niveispirillum cyanobacteriorum  
@Niveispirillum\_Rhodospirillaceae\_Rhodospirillales\_Alphaproteobacteria\_Proteobacteria\_Bacteria  
WP\_102114272:0.0840504620,Sorangium cellulosum  
@Sorangium\_Polyangiaceae\_Sorangiiinae\_Myxococcales\_Deltaproteobacteria\_Proteobacteria\_Bacteria  
WP\_104985532:0.1330801502)99:0.0258609935)91:0.0190834150)59:0.0164386632,(Agrobacterium tumefaciens  
@Agrobacterium tumefaciens complex\_Agrobacterium\_Rhizobium/Agrobacterium  
group\_Rhizobiaceae\_Rhizobiales\_Alphaproteobacteria\_Proteobacteria\_Bacteria  
WP\_060726440:0.1686229736,Rhizobium leguminosarum @Rhizobium\_Rhizobium/Agrobacterium  
group\_Rhizobiaceae\_Rhizobiales\_Alphaproteobacteria\_Proteobacteria\_Bacteria  
WP\_027691023:0.1317446115)100:0.2139326057)7:0.0110766687,Pseudomonas marincola  
@Pseudomonas\_Pseudomonadaceae\_Pseudomonadales\_Gammaproteobacteria\_Proteobacteria\_Bacteria  
WP\_090510702:0.1857904301)7:0.0158146624,(Aquincola tertiaricarbonis  
@Aquincola\_Burkholderiales\_Betaproteobacteria\_Proteobacteria\_Bacteria  
WP\_083440319:0.1904606805,((Burkholderia stagnalis @Burkholderia cepacia  
complex\_Burkholderia\_Burkholderiaceae\_Burkholderiales\_Betaproteobacteria\_Proteobacteria\_Bacteria  
WP\_060159306:0.0185878010,Cupriavidus necator  
@Cupriavidus\_Burkholderiaceae\_Burkholderiales\_Betaproteobacteria\_Proteobacteria\_Bacteria

WP\_011617236:0.0366985554)100:0.1510883581,Pelomonas puraquae  
@Pelomonas\_Comamonadaceae\_Burkholderiales\_Betaproteobacteria\_Proteobacteria\_Bacteria  
WP\_088482193:0.1861640283)100:0.0451403605)91:0.0631680655)7:0.0239392772,Sphingobium amiense  
@Sphingobium\_Sphingomonadaceae\_Sphingomonadales\_Alphaproteobacteria\_Proteobacteria\_Bacteria  
WP\_066697727:0.3158829240)95:0.0720039280,(Caballeronia glathei  
@Caballeronia\_Burkholderiaceae\_Burkholderiales\_Betaproteobacteria\_Proteobacteria\_Bacteria  
CDY78178:0.1660803499,((Candidimonas bauzanensis  
@Candidimonas\_Alcaligenaceae\_Burkholderiales\_Betaproteobacteria\_Proteobacteria\_Bacteria  
WP\_073103036:0.0660811852,Pusillimonas noertemanni  
@Pusillimonas\_Alcaligenaceae\_Burkholderiales\_Betaproteobacteria\_Proteobacteria\_Bacteria  
WP\_017523010:0.1175078688)100:0.0490261928,Castellaniella defragrans  
@Castellaniella\_Alcaligenaceae\_Burkholderiales\_Betaproteobacteria\_Proteobacteria\_Bacteria  
WP\_043684708:0.0873451095)100:0.0830486239)95:0.0298764910)44:0.0205793449,(Pseudomonas citronellolis  
@Pseudomonas\_Pseudomonadaceae\_Pseudomonadales\_Gammaproteobacteria\_Proteobacteria\_Bacteria  
KRV64091:0.1356738689,Sandaracinus amylolyticus  
@Sandaracinus\_Sandaracinaceae\_Sorangineae\_Myxococcales\_Deltaproteobacteria\_Proteobacteria\_Bacteria  
AKF04401:0.1980588906)46:0.0438040263)67:0.0211481941,((Bradyrhizobium erythrophlei  
@Bradyrhizobium\_Bradyrhizobiaceae\_Rhizobiales\_Alphaproteobacteria\_Proteobacteria\_Bacteria  
WP\_079572443:0.1019330590,Luteibacter rhizovicius  
@Luteibacter\_Rhodanobacteraceae\_Xanthomonadales\_Gammaproteobacteria\_Proteobacteria\_Bacteria  
WP\_063573683:0.1650341759)100:0.1057260785,((Burkholderia stabilis @Burkholderia cepacia  
complex\_Burkholderia\_Burkholderiaceae\_Burkholderiales\_Betaproteobacteria\_Proteobacteria\_Bacteria  
WP\_065501452:0.0851884648,Cupriavidus metallidurans  
@Cupriavidus\_Burkholderiaceae\_Burkholderiales\_Betaproteobacteria\_Proteobacteria\_Bacteria  
WP\_011520006:0.0791296968)100:0.0789669440,Pseudomonas lutea  
@Pseudomonas\_Pseudomonadaceae\_Pseudomonadales\_Gammaproteobacteria\_Proteobacteria\_Bacteria  
PTU61493:0.1977154705)97:0.0513170586)57:0.0133438898)62:0.0208408420,((Caballeronia sordidicola  
@Caballeronia\_Burkholderiaceae\_Burkholderiales\_Betaproteobacteria\_Proteobacteria\_Bacteria  
WP\_031357941:0.0915902489,Paraburkholderia diazotrophica  
@Paraburkholderia\_Burkholderiaceae\_Burkholderiales\_Betaproteobacteria\_Proteobacteria\_Bacteria  
WP\_090864016:0.0677019626)100:0.0820674102,Janthinobacterium lividum  
@Janthinobacterium\_Oxalobacteraceae\_Burkholderiales\_Betaproteobacteria\_Proteobacteria\_Bacteria  
WP\_034787392:0.1012360768)73:0.0326648135)85:0.0198405838,(Herbaspirillum lusitanum  
@Herbaspirillum\_Oxalobacteraceae\_Burkholderiales\_Betaproteobacteria\_Proteobacteria\_Bacteria  
WP\_016835371:0.1459333669,Pseudoduganella violaceinigra  
@Pseudoduganella\_Oxalobacteraceae\_Burkholderiales\_Betaproteobacteria\_Proteobacteria\_Bacteria  
WP\_028101340:0.2347637900)81:0.0300839860)94:0.0164837310)100:0.0434911116,((((((((Arsenophonus nasoniae  
@Arsenophonus\_Morganellaceae\_Enterobacterales\_Gammaproteobacteria\_Proteobacteria\_Bacteria  
WP\_026822031:0.1656110088,(Cosenzaea myxofaciens  
@Cosenzaea\_Morganellaceae\_Enterobacterales\_Gammaproteobacteria\_Proteobacteria\_Bacteria  
WP\_066746698:0.0675221638,(((Moellerella wisconsensis  
@Moellerella\_Morganellaceae\_Enterobacterales\_Gammaproteobacteria\_Proteobacteria\_Bacteria  
WP\_053908085:0.1030296477,Morganella morgani  
@Morganella\_Morganellaceae\_Enterobacterales\_Gammaproteobacteria\_Proteobacteria\_Bacteria  
KLO02150:0.0567118108)100:0.0181163605,Providencia sneebia  
@Providencia\_Morganellaceae\_Enterobacterales\_Gammaproteobacteria\_Proteobacteria\_Bacteria  
WP\_008916067:0.0921739099)100:0.0122385225,Proteus alimentorum  
@Morganellaceae\_Enterobacterales\_Gammaproteobacteria\_Proteobacteria\_Bacteria  
WP\_099073822:0.0608516721)100:0.0354921206)100:0.0217684637)97:0.0199489025,Photobacterium luminescens

@Photorhabdus\_Morganellaceae\_Enterobacterales\_Gammaproteobacteria\_Proteobacteria\_Bacteria  
WP\_105395381:0.1442724435)89:0.0361785855,(Brenneria goodwinii

@Brenneria\_Pectobacteriaceae\_Enterobacterales\_Gammaproteobacteria\_Proteobacteria\_Bacteria  
WP\_095834591:0.0545393341,Lonsdalea populi

@Lonsdalea\_Pectobacteriaceae\_Enterobacterales\_Gammaproteobacteria\_Proteobacteria\_Bacteria  
WP\_085687100:0.1064005215)95:0.0340578410)73:0.0068083942,(((Chania multitudinisentens

@Chania\_Yersiniaceae\_Enterobacterales\_Gammaproteobacteria\_Proteobacteria\_Bacteria  
WP\_024911385:0.0794074369,Gibbsiella quercinecans

@Gibbsiella\_Enterobacteriaceae\_Enterobacterales\_Gammaproteobacteria\_Proteobacteria\_Bacteria  
WP\_095847996:0.0247987705)100:0.0117282577,Yersinia pestis

@Yersinia\_Yersiniaceae\_Enterobacterales\_Gammaproteobacteria\_Proteobacteria\_Bacteria  
WP\_076638651:0.0900140054)89:0.0120252987,Serratia odorifera

@Serratia\_Yersiniaceae\_Enterobacterales\_Gammaproteobacteria\_Proteobacteria\_Bacteria  
WP\_088499746:0.0731653019)89:0.0202469747)74:0.0000021265,(Endozoicomonas atrinae

@Endozoicomonas\_Hahellaceae\_Oceanospirillales\_Gammaproteobacteria\_Proteobacteria\_Bacteria  
WP\_066017362:0.2483402677,((Hafnia alvei

@Hafnia\_Hafniaceae\_Enterobacterales\_Gammaproteobacteria\_Proteobacteria\_Bacteria  
WP\_072309884:0.0088703349,Obesumbacterium proteus

@Obesumbacterium\_Hafniaceae\_Enterobacterales\_Gammaproteobacteria\_Proteobacteria\_Bacteria  
WP\_061554737:0.0167348597)100:0.0253145767,Salmonella enterica

@Salmonella\_Enterobacteriaceae\_Enterobacterales\_Gammaproteobacteria\_Proteobacteria\_Bacteria  
WP\_058344462:0.1526254151)100:0.0472489828)100:0.0209180737)86:0.0283705966,(Budvicia aquatica

@Budvicia\_Budviciaceae\_Enterobacterales\_Gammaproteobacteria\_Proteobacteria\_Bacteria  
WP\_099044354:0.0801735050,((Leminorella grimontii

@Leminorella\_Budviciaceae\_Enterobacterales\_Gammaproteobacteria\_Proteobacteria\_Bacteria  
WP\_027274394:0.0378952091,Metakosakonia massiliensis

@Metakosakonia\_Enterobacteriaceae\_Enterobacterales\_Gammaproteobacteria\_Proteobacteria\_Bacteria  
WP\_044175758:0.1442030028)100:0.0742143628,Pragia fontium

@Pragia\_Budviciaceae\_Enterobacterales\_Gammaproteobacteria\_Proteobacteria\_Bacteria  
WP\_074822707:0.0470804682)100:0.0490040838)91:0.0712535637)96:0.0238223606,(((Buttiauxella ferragutiae

@Enterobacteriaceae\_Enterobacterales\_Gammaproteobacteria\_Proteobacteria\_Bacteria  
WP\_064548608:0.0847679164,((Citrobacter koseri

@Citrobacter\_Enterobacteriaceae\_Enterobacterales\_Gammaproteobacteria\_Proteobacteria\_Bacteria  
CDZ82466:0.0643553371,(((Enterobacter cancerogenus @Enterobacter cloacae  
complex\_Enterobacter\_Enterobacteriaceae\_Enterobacterales\_Gammaproteobacteria\_Proteobacteria\_Bacteria  
WP\_102889877:0.2138464121,Franconibacter helveticus

@Franconibacter\_Enterobacteriaceae\_Enterobacterales\_Gammaproteobacteria\_Proteobacteria\_Bacteria  
WP\_024552497:0.0815417220)96:0.0442930340,(Enterobacter kobei @Enterobacter cloacae  
complex\_Enterobacter\_Enterobacteriaceae\_Enterobacterales\_Gammaproteobacteria\_Proteobacteria\_Bacteria  
WP\_088219249:0.0434530197,Siccibacter colletis

@Siccibacter\_Enterobacteriaceae\_Enterobacterales\_Gammaproteobacteria\_Proteobacteria\_Bacteria  
WP\_031520614:0.0753490417)93:0.0143612132)95:0.0359330259,(Klebsiella grimontii

@Klebsiella\_Enterobacteriaceae\_Enterobacterales\_Gammaproteobacteria\_Proteobacteria\_Bacteria  
WP\_098140983:0.0718033180,Shimwellia blattae

@Shimwellia\_Enterobacteriaceae\_Enterobacterales\_Gammaproteobacteria\_Proteobacteria\_Bacteria  
WP\_002439805:0.1944782541)95:0.0453051802)81:0.0107713802)89:0.0149677331,Trabulsiella odontotermitis

@Trabulsiella\_Enterobacteriaceae\_Enterobacterales\_Gammaproteobacteria\_Proteobacteria\_Bacteria  
WP\_054179270:0.0500045530)94:0.0239445167)99:0.0564105973,Cedecea neteri

@Cedecea\_Enterobacteriaceae\_Enterobacterales\_Gammaproteobacteria\_Proteobacteria\_Bacteria

WP\_061274983:0.0969601594)96:0.0426936450,Nissabacter archeti  
@Nissabacter\_Yersiniaceae\_Enterobacterales\_Gammaproteobacteria\_Proteobacteria\_Bacteria  
WP\_072930498:0.1054886343)77:0.0234376728,((Erwinia typographi  
@Erwinia\_Erwiniaceae\_Enterobacterales\_Gammaproteobacteria\_Proteobacteria\_Bacteria  
WP\_034895082:0.0708458346,Pantoea theicola  
@Mixta\_Erwiniaceae\_Enterobacterales\_Gammaproteobacteria\_Proteobacteria\_Bacteria  
WP\_103059469:0.0633763488)100:0.0601507896,(Ewingella americana  
@Ewingella\_Yersiniaceae\_Enterobacterales\_Gammaproteobacteria\_Proteobacteria\_Bacteria  
WP\_034791731:0.0444839018,Rahnella victoriana  
@Rahnella\_Yersiniaceae\_Enterobacterales\_Gammaproteobacteria\_Proteobacteria\_Bacteria  
WP\_095922824:0.0359678398)100:0.0557556411)85:0.0060600499)87:0.0266378142)100:0.1058005004,Pseudomona  
s aeruginosa @Pseudomonas\_Pseudomonadaceae\_Pseudomonadales\_Gammaproteobacteria\_Proteobacteria\_Bacteria  
WP\_034022207:0.1277649374)65:0.0000025621,(Desulfovibrio cuneatus  
@Desulfovibrio\_Desulfovibrionaceae\_Desulfovibrionales\_Deltaproteobacteria\_Proteobacteria\_Bacteria  
WP\_027187275:0.2848630508,Haematospirillum jordaniae  
@Haematospirillum\_Rhodospirillaceae\_Rhodospirillales\_Alphaproteobacteria\_Proteobacteria\_Bacteria  
WP\_082811990:0.2117880124)89:0.0714497038)88:0.0218911671,Microvirgula aerodenitrificans  
@Microvirgula\_Chromobacteriaceae\_Neisseriales\_Betaproteobacteria\_Proteobacteria\_Bacteria  
WP\_028499216:0.0902482955)100:0.0894814704)100:0.0874842714,Helicobacter pylori  
@Helicobacter\_Helicobacteraceae\_Campylobacterales\_Epsilonproteobacteria\_Proteobacteria\_Bacteria  
WP\_000247356:0.5952343338)96:0.0175236457,((((Achromobacter arsenitoxydans  
@Achromobacter\_Alcaligenaceae\_Burkholderiales\_Betaproteobacteria\_Proteobacteria\_Bacteria  
WP\_008157526:0.0818109107,Bordetella pertussis  
@Bordetella\_Alcaligenaceae\_Burkholderiales\_Betaproteobacteria\_Proteobacteria\_Bacteria  
WP\_019248026:0.0788056371)100:0.0527490905,Orrella dioscoreae  
@Orrella\_Alcaligenaceae\_Burkholderiales\_Betaproteobacteria\_Proteobacteria\_Bacteria  
WP\_067758050:0.1404922352)100:0.0779893343,(Alcaligenes faecalis  
@Alcaligenes\_Alcaligenaceae\_Burkholderiales\_Betaproteobacteria\_Proteobacteria\_Bacteria  
WP\_088451656:0.2703912460,Dokdonella korensis  
@Dokdonella\_Rhodanobacteraceae\_Xanthomonadales\_Gammaproteobacteria\_Proteobacteria\_Bacteria  
WP\_067647590:0.2261295043)72:0.0705780781)64:0.0281022625,((((((((Actinobacillus seminis  
@Actinobacillus\_Pasteurellaceae\_Pasteurellales\_Gammaproteobacteria\_Proteobacteria\_Bacteria  
WP\_094946227:0.0871329888,(Glaesserella parasuis  
@Glaesserella\_Pasteurellaceae\_Pasteurellales\_Gammaproteobacteria\_Proteobacteria\_Bacteria  
WP\_005710577:0.0158862556,(Muribacter muris  
@Muribacter\_Pasteurellaceae\_Pasteurellales\_Gammaproteobacteria\_Proteobacteria\_Bacteria  
WP\_047975913:0.0187802103,Rodentibacter heylii  
@Rodentibacter\_Pasteurellaceae\_Pasteurellales\_Gammaproteobacteria\_Proteobacteria\_Bacteria  
WP\_077462335:0.0145585642)100:0.0211531457)100:0.0397352243)100:0.0278172292,Aggregatibacter  
actinomycetemcomitans  
@Aggregatibacter\_Pasteurellaceae\_Pasteurellales\_Gammaproteobacteria\_Proteobacteria\_Bacteria  
WP\_005547635:0.1110382443)100:0.0437492242,(Haemophilus felis  
@Pasteurellaceae\_Pasteurellales\_Gammaproteobacteria\_Proteobacteria\_Bacteria  
WP\_078240429:0.0155467958,Pasteurella dagmatis  
@Pasteurella\_Pasteurellaceae\_Pasteurellales\_Gammaproteobacteria\_Proteobacteria\_Bacteria  
WP\_005763114:0.0187651985)100:0.0607107053)100:0.0573459234,Gallibacterium salpingitidis  
@Gallibacterium\_Pasteurellaceae\_Pasteurellales\_Gammaproteobacteria\_Proteobacteria\_Bacteria  
WP\_066421667:0.0835985459)100:0.1780603709,Photobacterium ganghwense  
@Photobacterium\_Vibrionaceae\_Vibrionales\_Gammaproteobacteria\_Proteobacteria\_Bacteria

WP\_047884927:0.2056723477)100:0.1247485024,Aeromonas allosaccharophila  
@Aeromonas\_Aeromonadaceae\_Aeromonadales\_Gammaproteobacteria\_Proteobacteria\_Bacteria  
WP\_042655611:0.1859115282)100:0.1451817562,Basilea psittacipulmonis  
@Basilea\_Alcaligenaceae\_Burkholderiales\_Betaproteobacteria\_Proteobacteria\_Bacteria  
WP\_038497733:0.1567740241)95:0.0658676081,Uliginosibacterium gangwonense  
@Uliginosibacterium\_Zoogloeaceae\_Rhodocyclales\_Betaproteobacteria\_Proteobacteria\_Bacteria  
WP\_018608794:0.2083100860)68:0.0592602100,((((((Burkholderia plantarii  
@Burkholderia\_Burkholderiaceae\_Burkholderiales\_Betaproteobacteria\_Proteobacteria\_Bacteria  
WP\_055138049:0.1224867479,Pseudomonas acidophila  
@Pseudomonas\_Pseudomonadaceae\_Pseudomonadales\_Gammaproteobacteria\_Proteobacteria\_Bacteria  
WP\_096721039:0.0839555176)100:0.0289411436,Paraburkholderia aromaticivorans  
@Paraburkholderia\_Burkholderiaceae\_Burkholderiales\_Betaproteobacteria\_Proteobacteria\_Bacteria  
WP\_095417440:0.0969788078)100:0.0275560598,Caballeronia udeis  
@Caballeronia\_Burkholderiaceae\_Burkholderiales\_Betaproteobacteria\_Proteobacteria\_Bacteria  
WP\_062091720:0.1101424004)100:0.1992129227,Ralstonia insidiosa  
@Ralstonia\_Burkholderiaceae\_Burkholderiales\_Betaproteobacteria\_Proteobacteria\_Bacteria  
WP\_064802752:0.1546691982)98:0.0258836722,(Cupriavidus basilensis  
@Cupriavidus\_Burkholderiaceae\_Burkholderiales\_Betaproteobacteria\_Proteobacteria\_Bacteria  
WP\_043349474:0.1326143183,Pandoraea pulmonicola  
@Pandoraea\_Burkholderiaceae\_Burkholderiales\_Betaproteobacteria\_Proteobacteria\_Bacteria  
WP\_039408455:0.1833295879)94:0.0327692523)62:0.0079799135,Laribacter hongkongensis  
@Laribacter\_Chromobacteriaceae\_Neisseriales\_Betaproteobacteria\_Proteobacteria\_Bacteria  
WP\_027824489:0.2208961941)95:0.0217626947)66:0.0302792456)98:0.0435409581,(Alistipes indistinctus  
@Alistipes\_Rikenellaceae\_Bacteroidales\_Bacteroidia\_Bacteroidetes\_Bacteria  
WP\_040294199:0.1944362134,((Butyricimonas synergistica  
@Butyricimonas\_Odoribacteraceae\_Bacteroidales\_Bacteroidia\_Bacteroidetes\_Bacteria  
OKZ19188:0.0854709119,(Culturomica massiliensis  
@Culturomica\_Odoribacteraceae\_Bacteroidales\_Bacteroidia\_Bacteroidetes\_Bacteria  
WP\_068690703:0.0768469197,Odoribacter splanchnicus  
@Odoribacter\_Odoribacteraceae\_Bacteroidales\_Bacteroidia\_Bacteroidetes\_Bacteria  
WP\_087381414:0.0718372680)100:0.1860468520)100:0.0745893965,(Copro bacter fastidiosus  
@Bacteroidia\_Bacteroidetes\_Bacteria WP\_022391309:0.1669576352,(Massilibacteroides vaginae  
@Massilibacteroides\_Porphyrimonadaceae\_Bacteroidales\_Bacteroidia\_Bacteroidetes\_Bacteria  
WP\_085537457:0.1804624821,Parabacteroides chartae  
@Parabacteroides\_Tannerellaceae\_Bacteroidales\_Bacteroidia\_Bacteroidetes\_Bacteria  
WP\_079684249:0.0834416637)89:0.0566501250)90:0.0193058193)100:0.0974492982)100:0.1536501326)95:0.041610  
5801)100:0.0777815175)100:0.0644147186,(Denitrovibrio acetiphilus  
@Denitrovibrio\_Deferribacteraceae\_Deferribacterales\_Deferribacteres\_Bacteria  
WP\_013010999:0.2597445370,Kuenenia stuttgartiensis @Candidatus Kuenenia\_Candidatus Brocadiaceae\_Candidatus  
Brocadiales\_Planctomycetia\_Planctomycetes\_Bacteria  
CAJ72046:0.2478472881)100:0.2385100389)93:0.0276858514,(Bdellovibrio bacteriovorus  
@Bdellovibrio\_Bdellovibrionaceae\_Bdellovibrionales\_Oligoflexia\_Proteobacteria\_Bacteria  
WP\_011163349:0.1993780132,Leptospira alexanderi  
@Leptospira\_Leptospiraceae\_Leptospirales\_Spirochaetes\_Bacteria  
WP\_020983784:0.3455894552)100:0.2924190854)15:0.0207935195,(((Adhaeribacter aquaticus  
@Adhaeribacter\_Hymenobacteraceae\_Cytophagales\_Cytophagia\_Bacteroidetes\_Bacteria  
WP\_026462307:0.1720066766,Pontibacter ramchanderi  
@Pontibacter\_Hymenobacteraceae\_Cytophagales\_Cytophagia\_Bacteroidetes\_Bacteria  
WP\_101445558:0.0720040745)97:0.0676092370,Chitinophaga pinensis

@Chitinophaga\_Chitinophagaceae\_Chitinophagales\_Chitinophagia\_Bacteroidetes\_Bacteria  
WP\_012793430:0.1404802973)98:0.0382315662,((((Apibacter adventoris  
@Apibacter\_Flavobacteriaceae\_Flavobacteriales\_Flavobacteriia\_Bacteroidetes\_Bacteria  
WP\_105193136:0.4049607333,Sphingobacterium paucimobilis  
@Sphingobacterium\_Sphingobacteriaceae\_Sphingobacteriales\_Sphingobacteriia\_Bacteroidetes\_Bacteria  
WP\_021068502:0.1583636437)95:0.1710638008,Solitalea canadensis  
@Solitalea\_Sphingobacteriaceae\_Sphingobacteriales\_Sphingobacteriia\_Bacteroidetes\_Bacteria  
WP\_014681870:0.1542745960)11:0.0205358448,(Pedobacter oryzae  
@Pedobacter\_Sphingobacteriaceae\_Sphingobacteriales\_Sphingobacteriia\_Bacteroidetes\_Bacteria  
WP\_026897284:0.0990553698,Solirubrum puertoriconensis @Cytophagales\_Cytophagia\_Bacteroidetes\_Bacteria  
WP\_059066974:0.2918179149)70:0.0411635405)10:0.0395662459,((((Arachidococcus rhizosphaerae  
@Arachidococcus\_Chitinophagaceae\_Chitinophagales\_Chitinophagia\_Bacteroidetes\_Bacteria  
WP\_091399765:0.3412873236,Mucilaginibacter polytrichastri  
@Mucilaginibacter\_Sphingobacteriaceae\_Sphingobacteriales\_Sphingobacteriia\_Bacteroidetes\_Bacteria  
WP\_074489366:0.2792851145)90:0.0533606551,Pseudosphingobacterium domesticum  
@Pseudosphingobacterium\_Sphingobacteriaceae\_Sphingobacteriales\_Sphingobacteriia\_Bacteroidetes\_Bacteria  
WP\_093332811:0.4339525662)99:0.0986282084,((((Arsenicibacter rosenii  
@Arsenicibacter\_Cytophagaceae\_Cytophagales\_Cytophagia\_Bacteroidetes\_Bacteria  
WP\_071502926:0.1771255527,((((Bergeyella zoohelcum  
@Bergeyella\_Flavobacteriaceae\_Flavobacteriales\_Flavobacteriia\_Bacteroidetes\_Bacteria  
WP\_002686866:0.2331239722,Cloacibacterium normanense  
@Flavobacteriaceae\_Flavobacteriales\_Flavobacteriia\_Bacteroidetes\_Bacteria  
WP\_069800498:0.0672547994)96:0.0126099143,(Riemerella anatipestifer  
@Riemerella\_Flavobacteriaceae\_Flavobacteriales\_Flavobacteriia\_Bacteroidetes\_Bacteria  
WP\_052911601:0.1388173879,Riemerella columbina  
@Riemerella\_Flavobacteriaceae\_Flavobacteriales\_Flavobacteriia\_Bacteroidetes\_Bacteria  
WP\_018675423:0.1128605860)97:0.0256984240)99:0.0278551861,Soonwooa buanensis  
@Soonwooa\_Flavobacteriaceae\_Flavobacteriales\_Flavobacteriia\_Bacteroidetes\_Bacteria  
WP\_079667659:0.0881030959)100:0.0751791890,Elizabethkingia anophelis  
@Elizabethkingia\_Flavobacteriaceae\_Flavobacteriales\_Flavobacteriia\_Bacteroidetes\_Bacteria  
WP\_058878340:0.1475256652)100:0.1492265924,(Marinilabilia salmonicolor  
@Marinilabilia\_Marinilabiliaceae\_Marinilabiliales\_Bacteroidia\_Bacteroidetes\_Bacteria  
WP\_106152690:0.1460131190,Thermophagus xiamenensis  
@Thermophagus\_Marinilabiliaceae\_Marinilabiliales\_Bacteroidia\_Bacteroidetes\_Bacteria  
WP\_010527356:0.1269427941)100:0.2568852945)100:0.0644071961,Hymenobacter gelipurpurascens  
@Hymenobacter\_Hymenobacteraceae\_Cytophagales\_Cytophagia\_Bacteroidetes\_Bacteria  
SNC76491:0.3073107276)98:0.0429560738)95:0.0511775890,Pedobacter steynii  
@Pedobacter\_Sphingobacteriaceae\_Sphingobacteriales\_Sphingobacteriia\_Bacteroidetes\_Bacteria  
WP\_074605928:0.2069497911)89:0.0254740917,Fluviicola taffensis  
@Fluviicola\_Crocinitomicaceae\_Flavobacteriales\_Flavobacteriia\_Bacteroidetes\_Bacteria  
WP\_013686124:0.1848223214)80:0.0215248144,(Myroides profundi  
@Myroides\_Flavobacteriaceae\_Flavobacteriales\_Flavobacteriia\_Bacteroidetes\_Bacteria  
WP\_041893026:0.2977808396,Saprospira grandis  
@Saprospira\_Saprospiraceae\_Saprospirales\_Saprospira\_Bacteroidetes\_Bacteria  
WP\_002660980:0.2343748435)94:0.1283795112)74:0.0054425702,Dyadobacter koreensis  
@Dyadobacter\_Cytophagaceae\_Cytophagales\_Cytophagia\_Bacteroidetes\_Bacteria  
WP\_090334539:0.2520378558)94:0.0252866320)86:0.0156333368,Mucilaginibacter gotjawali  
@Mucilaginibacter\_Sphingobacteriaceae\_Sphingobacteriales\_Sphingobacteriia\_Bacteroidetes\_Bacteria  
WP\_096355717:0.1640194203)73:0.0217937874,(Cyclobacterium marinum

@Cyclobacterium\_Cyclobacteriaceae\_Cytophagales\_Cytophagia\_Bacteroidetes\_Bacteria  
WP\_014021067:0.2529944129,Flavobacterium granuli

@Flavobacterium\_Flavobacteriaceae\_Flavobacteriales\_Flavobacteriia\_Bacteroidetes\_Bacteria  
WP\_072938503:0.1684726139)99:0.0817981528)75:0.0243795948,Confluentibacter citreus

@Confluentibacter\_Flavobacteriaceae\_Flavobacteriales\_Flavobacteriia\_Bacteroidetes\_Bacteria  
WP\_100616065:0.2631952364)52:0.0166206520)28:0.0316556674,(Fibrella aestuarina

@Fibrella\_Cytophagaceae\_Cytophagales\_Cytophagia\_Bacteroidetes\_Bacteria WP\_015056675:0.2538076186,(Gillisia  
marina @Gillisia\_Flavobacteriaceae\_Flavobacteriales\_Flavobacteriia\_Bacteroidetes\_Bacteria  
WP\_029331552:0.1113158376,(Mesonia mobilis

@Mesonia\_Flavobacteriaceae\_Flavobacteriales\_Flavobacteriia\_Bacteroidetes\_Bacteria  
WP\_027886099:0.0621820898,Zunongwangia mangrovi

@Zunongwangia\_Flavobacteriaceae\_Flavobacteriales\_Flavobacteriia\_Bacteroidetes\_Bacteria  
WP\_092541642:0.0372395252)100:0.1781385242)100:0.0914046408)99:0.0962512044)32:0.0284696787)33:0.057169  
8285,Arcticibacter svalbardensis

@Arcticibacter\_Sphingobacteriaceae\_Sphingobacteriales\_Sphingobacteriia\_Bacteroidetes\_Bacteria  
WP\_016195343:0.2325608257)100:0.3043504551)14:0.0216745543,(((Andreprevotia chitinilytica

@Andreprevotia\_Chromobacteriaceae\_Neisseriales\_Betaproteobacteria\_Proteobacteria\_Bacteria  
WP\_035053934:0.1324791093,Chitiniphilus shinanonensis

@Chitiniphilus\_Chromobacteriaceae\_Neisseriales\_Betaproteobacteria\_Proteobacteria\_Bacteria  
WP\_018746178:0.1512749303)100:0.1884220509,(((Commensalibacter intestini

@Acetobacteraceae\_Rhodospirillales\_Alphaproteobacteria\_Proteobacteria\_Bacteria  
WP\_040363793:0.2451934928,Gilliamella bombicola

@Gilliamella\_Orbaceae\_Orbales\_Gammaproteobacteria\_Proteobacteria\_Bacteria  
WP\_091346053:0.1437817000)100:0.0462682296,Wohlfahrtiimonas larvae

@Wohlfahrtiimonas\_Gammaproteobacteria\_Proteobacteria\_Bacteria  
WP\_077926859:0.2626978000)100:0.1160807935,(((Izhakiella australiensis

@Izhakiella\_Enterobacteriaceae\_Enterobacteriales\_Gammaproteobacteria\_Proteobacteria\_Bacteria  
WP\_078001728:0.0985546956,Sodalis praecaptivus

@Sodalis\_Pectobacteriaceae\_Enterobacteriales\_Gammaproteobacteria\_Proteobacteria\_Bacteria  
WP\_025420757:0.1393254010)100:0.1780944008,(Pseudomonas rhodesiae

@Pseudomonas\_Pseudomonadaceae\_Pseudomonadales\_Gammaproteobacteria\_Proteobacteria\_Bacteria  
WP\_040265615:0.0689803111,Stenotrophomonas rhizophila

@Pseudomonas\_Pseudomonadaceae\_Pseudomonadales\_Gammaproteobacteria\_Proteobacteria\_Bacteria  
KWW18992:0.0761841462)100:0.1130938960)79:0.0142948718)100:0.0922698529)100:0.0566465179,Chitinimonas  
koreensis @Chitinimonas\_Burkholderiaceae\_Burkholderiales\_Betaproteobacteria\_Proteobacteria\_Bacteria  
WP\_028447063:0.2011205204)93:0.0301096014,(((Deroxia lacustris

@Deroxia\_Alcaligenaceae\_Burkholderiales\_Betaproteobacteria\_Proteobacteria\_Bacteria  
WP\_085316700:0.2319103701,Rhizobacter gummiphilus

@Rhizobacter\_Burkholderiales\_Betaproteobacteria\_Proteobacteria\_Bacteria  
WP\_085753626:0.2028071614)67:0.0406514030,Hydrocarboniphaga daqingensis

@Hydrocarboniphaga\_Sinobacteraceae\_Nevskiales\_Gammaproteobacteria\_Proteobacteria\_Bacteria  
WP\_072894211:0.2217501403)67:0.0295639520,(Duganella sacchari

@Duganella\_Oxalobacteraceae\_Burkholderiales\_Betaproteobacteria\_Proteobacteria\_Bacteria  
WP\_072780888:0.1413448874,(Massilia timonae

@Massilia\_Oxalobacteraceae\_Burkholderiales\_Betaproteobacteria\_Proteobacteria\_Bacteria  
WP\_005669980:0.1528163255,Rugamonas rubra

@Rugamonas\_Pseudomonadaceae\_Pseudomonadales\_Gammaproteobacteria\_Proteobacteria\_Bacteria  
WP\_093388005:0.1122905041)98:0.0391087594)98:0.0783955436)100:0.1685025336,Polyangium brachysporum

@Burkholderiales\_Betaproteobacteria\_Proteobacteria\_Bacteria

WP\_047196780:0.2727124106)93:0.0390815670)98:0.0378912096)13:0.0418804557,(((Edaphobacter aggregans  
@Edaphobacter\_Acidobacteriaceae\_Acidobacteriales\_Acidobacteria\_Bacteria  
WP\_051978768:0.2719314761,Granulicella mallensis  
@Granulicella\_Acidobacteriaceae\_Acidobacteriales\_Acidobacteria\_Bacteria  
WP\_014266585:0.3357420436)99:0.1073053955,(Methylobacterium populi  
@Methylobacterium\_Methylobacteriaceae\_Rhizobiales\_Alphaproteobacteria\_Proteobacteria\_Bacteria  
WP\_012452302:0.2870771143,Rhodopirellula europaea  
@Rhodopirellula\_Planctomycetaceae\_Planctomycetales\_Planctomycetia\_Planctomycetes\_Bacteria  
WP\_008661361:0.3858800961)100:0.4622527905)21:0.0487185905,Sulfurovum lithotrophicum  
@Sulfurovum\_Epsilonproteobacteria\_Proteobacteria\_Bacteria  
WP\_046551572:0.5654169803)11:0.0283094399)90:0.0369463821,((((((Acidithiobacillus ferrivorans  
@Acidithiobacillus\_Acidithiobacillaceae\_Acidithiobacillales\_Acidithiobacillia\_Proteobacteria\_Bacteria  
WP\_041649679:0.2353968676,Solimonas aquatica  
@Solimonas\_Sinobacteraceae\_Nevskiales\_Gammaproteobacteria\_Proteobacteria\_Bacteria  
WP\_093283025:0.2502734202)100:0.1179783869,Sulfurifustis variabilis  
@Sulfurifustis\_Acidiferrobacteraceae\_Acidiferrobacteriales\_Gammaproteobacteria\_Proteobacteria\_Bacteria  
WP\_096462460:0.1659881844)100:0.1269800523,Deinococcus grandis  
@Deinococcus\_Deinococcaceae\_Deinococcales\_Deinococci\_Deinococcus-Thermus\_Bacteria  
WP\_083524049:0.8007076821)94:0.0482934072,((Arhodomonas aquaeolei  
@Arhodomonas\_Ectothiorhodospiraceae\_Chromatiales\_Gammaproteobacteria\_Proteobacteria\_Bacteria  
WP\_018719441:0.2320592751,(Klebsormidium nitens  
@Klebsormidium\_Klebsormidiaceae\_Klebsormidiales\_Klebsormidiophyceae\_Streptophyta\_Viridiplantae\_Eukaryota  
GAQ88150:1.3027969130,Phormidesmis priestleyi Ana  
@Phormidesmis\_Leptolyngbyaceae\_Synechococcales\_Cyanobacteria\_Bacteria  
KQP35711:0.8717156632)62:0.1366594424)54:0.0750397270,(Halococcus hamelinensis  
@Halococcus\_Halococcaceae\_Halobacteriales\_Halobacteria\_Euryarchaeota\_Archaea  
WP\_007692361:0.2713665916,Methanonatronarchaeum thermophilum  
@Methanonatronarchaeum\_Methanonatronarchaeia\_Euryarchaeota\_Archaea  
WP\_086636648:0.2978293795)100:0.3595704173)53:0.0809836687)61:0.1132145054,((((((Actinomadura hibisca  
@Actinomadura\_Thermomonosporaceae\_Streptosporangiales\_Actinobacteria\_Bacteria  
WP\_067488747:0.2410567826,(Microtetraspora glauca  
@Microtetraspora\_Streptosporangiaceae\_Streptosporangiales\_Actinobacteria\_Bacteria  
WP\_030496405:0.0559193067,Streptomyces curacoi  
@Streptomyces\_Streptomycetaceae\_Streptomycetales\_Actinobacteria\_Bacteria  
WP\_062149900:0.0156746300)100:0.1138610231)98:0.0698094941,(Kitasatospora azatica  
@Kitasatospora\_Streptomycetaceae\_Streptomycetales\_Actinobacteria\_Bacteria  
WP\_035841078:0.1394763216,Streptacidiphilus jeojiense  
@Streptacidiphilus\_Streptomycetaceae\_Streptomycetales\_Actinobacteria\_Bacteria  
WP\_030248080:0.1296224437)100:0.0481284414)100:0.1404361845,((((Actinospica acidiphila  
@Actinospica\_Actinospicaceae\_Catenulisporales\_Actinobacteria\_Bacteria WP\_033272079:0.0860495013,Kitasatospora  
aureofaciens @Kitasatospora\_Streptomycetaceae\_Streptomycetales\_Actinobacteria\_Bacteria  
WP\_052840784:0.0686100721)94:0.0286596146,(Kitasatospora albolonga  
@Kitasatospora\_Streptomycetaceae\_Streptomycetales\_Actinobacteria\_Bacteria  
WP\_084749156:0.0694502448,Streptomyces roseus  
@Streptomyces\_Streptomycetaceae\_Streptomycetales\_Actinobacteria\_Bacteria  
WP\_048477492:0.0472491419)100:0.0346925626)94:0.0349268950,Streptosporangium nondiasticum  
@Streptosporangium\_Streptosporangiaceae\_Streptosporangiales\_Actinobacteria\_Bacteria  
WP\_106682140:0.0673628501)94:0.0278294922,(Glycomyces sambucus  
@Glycomyces\_Glycomycetaceae\_Glycomycetales\_Actinobacteria\_Bacteria



WP\_091049111:0.1734183268,Haloglycomyces albus  
@Haloglycomyces\_Glycomycetaceae\_Glycomycetales\_Actinobacteria\_Bacteria  
WP\_025273429:0.0774707696)100:0.0624887007)100:0.1186237662,Streptomyces gilvigriseus  
@Streptomyces\_Streptomycetaceae\_Streptomycetales\_Actinobacteria\_Bacteria  
WP\_071656840:0.0916826942)100:0.1568637070)100:0.1106514295,Variovorax paradoxus  
@Variovorax\_Comamonadaceae\_Burkholderiales\_Betaproteobacteria\_Proteobacteria\_Bacteria  
WP\_012745931:0.2928737524)93:0.0646848457,(Corallocooccus coralloides  
@Corallocooccus\_Myxococcaceae\_Cystobacterineae\_Myxococcales\_Deltaproteobacteria\_Proteobacteria\_Bacteria  
WP\_014399525:0.0754684723,((Cystobacter fuscus  
@Cystobacter\_Archangiaceae\_Cystobacterineae\_Myxococcales\_Deltaproteobacteria\_Proteobacteria\_Bacteria  
WP\_095990067:0.0730974098,Melittangium boletus  
@Melittangium\_Archangiaceae\_Cystobacterineae\_Myxococcales\_Deltaproteobacteria\_Proteobacteria\_Bacteria  
WP\_095976680:0.0707224850)100:0.1088759209,Stigmatella erecta  
@Stigmatella\_Archangiaceae\_Cystobacterineae\_Myxococcales\_Deltaproteobacteria\_Proteobacteria\_Bacteria  
WP\_093515652:0.0452054668)100:0.0130259063)100:0.2548653343)100:0.1892787740,(((Allonocardiopsis opalescens  
@Allonocardiopsis\_Streptosporangiales\_Actinobacteria\_Bacteria WP\_106243912:0.1999259634,((Herbidospora  
cretacea @Herbidospora\_Streptosporangiaceae\_Streptosporangiales\_Actinobacteria\_Bacteria  
WP\_030456182:0.0942228667,Streptosporangium subroseum  
@Streptosporangium\_Streptosporangiaceae\_Streptosporangiales\_Actinobacteria\_Bacteria  
WP\_089208948:0.1302162777)85:0.0440757771,Thermobispora bispora @Thermobispora\_Actinobacteria incertae  
sedis\_Actinobacteria\_Bacteria WP\_013130501:0.1463240175)60:0.0252814853)73:0.0493970052,Nonomurea  
maritima @Nonomurea\_Streptosporangiaceae\_Streptosporangiales\_Actinobacteria\_Bacteria  
WP\_090771307:0.0955944584)100:0.3678657492,((((((Amycolatopsis orientalis  
@Pseudonocardiaceae\_Pseudonocardiales\_Actinobacteria\_Bacteria WP\_043833518:0.1950231010,Gilvimirinus  
agarilyticus @Gilvimirinus\_Cellvibrionaceae\_Cellvibrionales\_Gammaproteobacteria\_Proteobacteria\_Bacteria  
WP\_041521924:0.1597603655)100:0.0525494397,Pseudomonas pachastrellae  
@Pseudomonas\_Pseudomonadaceae\_Pseudomonadales\_Gammaproteobacteria\_Proteobacteria\_Bacteria  
SFM12811:0.1289166074)100:0.0222696399,((Desulfonatronovibrio hydrogenovorans  
@Desulfonatronovibrio\_Desulfohalobiaceae\_Desulfovibrionales\_Deltaproteobacteria\_Proteobacteria\_Bacteria  
WP\_028575723:0.0859858678,Geoalkalibacter subterraneus  
@Geoalkalibacter\_Geobacteraceae\_Desulfuromonadales\_Deltaproteobacteria\_Proteobacteria\_Bacteria  
WP\_040198876:0.0827969061)100:0.1345447494,Salinicola tamaricis  
@Salinicola\_Halomonadaceae\_Oceanospirillales\_Gammaproteobacteria\_Proteobacteria\_Bacteria  
WP\_106419582:0.2078145028)100:0.0999924794)100:0.1190811780,(Brackiella oedipodis  
@Brackiella\_Alcaligenaceae\_Burkholderiales\_Betaproteobacteria\_Proteobacteria\_Bacteria  
WP\_028357436:0.3458250201,((Pseudoclavibacter helvolus  
@Pseudoclavibacter\_Microbacteriaceae\_Micrococcales\_Actinobacteria\_Bacteria  
WP\_068479326:0.3770110309,Saccharomonospora viridis  
@Saccharomonospora\_Pseudonocardiaceae\_Pseudonocardiales\_Actinobacteria\_Bacteria  
WP\_015786373:0.0558282411)89:0.0173509210,Thermobifida fusca  
@Thermobifida\_Nocardiopsaceae\_Streptosporangiales\_Actinobacteria\_Bacteria  
WP\_081430450:0.0289718874)100:0.1413795806)100:0.1593966821)100:0.0998071329,((((((Cellulomonas gilvus  
@Cellulomonas\_Cellulomonadaceae\_Micrococcales\_Actinobacteria\_Bacteria  
WP\_013883987:0.0540771579,Cellulosimicrobium aquatile  
@Cellulosimicrobium\_Promicromonosporaceae\_Micrococcales\_Actinobacteria\_Bacteria  
WP\_076406559:0.0806260798)100:0.0738502953,Microbacterium humi  
@Microbacterium\_Microbacteriaceae\_Micrococcales\_Actinobacteria\_Bacteria  
WP\_091184477:0.2066750516)58:0.0544896207,Rathayibacter tritici  
@Rathayibacter\_Microbacteriaceae\_Micrococcales\_Actinobacteria\_Bacteria

WP\_104272064:0.0999219580)28:0.0257527599,Curtobacterium luteum  
@Curtobacterium\_Microbacteriaceae\_Micrococcales\_Actinobacteria\_Bacteria  
WP\_058726032:0.1449617595)45:0.0306874166,Clavibacter capsici  
@Clavibacter\_Microbacteriaceae\_Micrococcales\_Actinobacteria\_Bacteria  
WP\_053773749:0.2036839036)100:0.1459255471,Nocardia amikacinitolerans  
@Nocardia\_Nocardiaceae\_Corynebacteriales\_Actinobacteria\_Bacteria  
WP\_067790259:0.3345804006)47:0.0260686612)97:0.1065645127,Conexibacter woesei  
@Conexibacter\_Conexibacteraceae\_Solirubrobacterales\_Thermoleophilia\_Actinobacteria\_Bacteria  
WP\_081690720:0.4714140242)85:0.1189088061)100:0.2614935498)96:0.1037155249)95:0.0807279026,Zymomonas  
mobilis @Zymomonas\_Sphingomonadaceae\_Sphingomonadales\_Alphaproteobacteria\_Proteobacteria\_Bacteria  
WP\_087379504:0.6323178663)65:0.0236882803,(((((((Algicola sagamiensis  
@Algicola\_Pseudoalteromonadaceae\_Alteromonadales\_Gammaproteobacteria\_Proteobacteria\_Bacteria  
WP\_018693143:0.2837018154,Wenyingzhuangia fucanilytica  
@Wenyingzhuangia\_Flavobacteriaceae\_Flavobacteriales\_Flavobacteriia\_Bacteroidetes\_Bacteria  
WP\_068826875:0.1892620184)100:0.0912296221,Endozoicomonas arenosclerae  
@Endozoicomonas\_Hahellaceae\_Oceanospirillales\_Gammaproteobacteria\_Proteobacteria\_Bacteria  
WP\_062266047:0.2487149603)69:0.0697059798,(Gallaecimonas xiamenensis  
@Gallaecimonas\_Gammaproteobacteria\_Proteobacteria\_Bacteria WP\_008486616:0.2866378977,Zymobacter palmae  
@Zymobacter\_Zymobacter group\_Halomonadaceae\_Oceanospirillales\_Gammaproteobacteria\_Proteobacteria\_Bacteria  
WP\_027705947:0.5246639136)64:0.0704718093)90:0.0402084438,Francisella philomiragia  
@Francisella\_Francisellaceae\_Thiotrichales\_Gammaproteobacteria\_Proteobacteria\_Bacteria  
WP\_012280943:0.3047168712)89:0.0228237700,((Alteromonas marina  
@Alteromonas\_Alteromonadaceae\_Alteromonadales\_Gammaproteobacteria\_Proteobacteria\_Bacteria  
WP\_039219242:0.2073530845,Gilvimirinus chinensis  
@Gilvimirinus\_Cellvibrionaceae\_Cellvibrionales\_Gammaproteobacteria\_Proteobacteria\_Bacteria  
WP\_020210257:0.1242071277)60:0.0253621108,(Cellvibrio mixtus  
@Cellvibrio\_Cellvibrionaceae\_Cellvibrionales\_Gammaproteobacteria\_Proteobacteria\_Bacteria  
WP\_039911959:0.1798528952,((Methylobacillus glycogenes  
@Methylobacillus\_Methylophilaceae\_Nitrosomonadales\_Betaproteobacteria\_Proteobacteria\_Bacteria  
WP\_025870350:0.0771968607,Tenderia electrophaga @Candidatus  
Tenderia\_Chromatiaceae\_Chromatiales\_Gammaproteobacteria\_Proteobacteria\_Bacteria  
ALP53021:0.1440756193)100:0.0720292653,Methylovorus glucosotrophus  
@Methylovorus\_Methylophilaceae\_Nitrosomonadales\_Betaproteobacteria\_Proteobacteria\_Bacteria  
WP\_015829419:0.0690403979)100:0.0534302882)92:0.0279303297)62:0.0561300859,Microbulbifer mangrovi  
@Microbulbifer\_Microbulbiferaceae\_Cellvibrionales\_Gammaproteobacteria\_Proteobacteria\_Bacteria  
WP\_078084362:0.2861939907)100:0.0340126954)100:0.3120206795,Piscirickettsia salmonis  
@Piscirickettsia\_Piscirickettsiaceae\_Thiotrichales\_Gammaproteobacteria\_Proteobacteria\_Bacteria  
WP\_017378214:0.3087829980)79:0.0803040743,((Enterovibrio calviensis  
@Enterovibrio\_Vibrionaceae\_Vibrionales\_Gammaproteobacteria\_Proteobacteria\_Bacteria  
WP\_017007766:0.1174548873,Shewanella morhuae  
@Shewanella\_Shewanellaceae\_Alteromonadales\_Gammaproteobacteria\_Proteobacteria\_Bacteria  
PTA51134:0.0673008495)100:0.1827949676,Ferrimonas balearica  
@Ferrimonas\_Ferrimonadaceae\_Alteromonadales\_Gammaproteobacteria\_Proteobacteria\_Bacteria  
WP\_013344162:0.1863112088)100:0.1496328045)100:0.2293863606,((((((Calothrix brevissima  
@Calothrix\_Rivulariaceae\_Nostocales\_Cyanobacteria\_Bacteria WP\_096642416:0.0554772017,Cylindrospermum  
stagnale @Cylindrospermum\_Nostocaceae\_Nostocales\_Cyanobacteria\_Bacteria  
WP\_015205685:0.0543193798)99:0.0221942665,Nostoc calcicola  
@Nostoc\_Nostocaceae\_Nostocales\_Cyanobacteria\_Bacteria  
WP\_073641506:0.0369179119)99:0.0258575535,Mastigocladopsis repens

@Mastigocladopsis\_Symphyonemataceae\_Nostocales\_Cyanobacteria\_Bacteria  
WP\_017316322:0.0483428661)100:0.0752645295,((Fischerella muscicola  
@Fischerella\_Hapalosiphonaceae\_Nostocales\_Cyanobacteria\_Bacteria WP\_016858454:0.0000022994,Mastigocladus  
laminosus @Mastigocladus\_Hapalosiphonaceae\_Nostocales\_Cyanobacteria\_Bacteria  
WP\_044448815:0.0000025164)100:0.0401597577,Oscillatoria nigro-viridis  
@Oscillatoria\_Oscillatoriaceae\_Oscillatoriales\_Oscillatoriophycideae\_Cyanobacteria\_Bacteria  
WP\_015179116:0.1448512054)89:0.0320971273)100:0.0918834829,Mastigocoleus testarum  
@Mastigocoleus\_Hapalosiphonaceae\_Nostocales\_Cyanobacteria\_Bacteria  
WP\_027844204:0.2399689815)100:0.0789937397,((Chthonomonas calidirosea  
@Chthonomonas\_Chthonomonadaceae\_Chthonomonadales\_Chthonomonadetes\_Armatimonadetes\_Bacteria  
WP\_075163171:0.1404483636,(Rhodothermus marinus @Rhodothermus\_Rhodothermaceae\_Bacteroidetes Order II.  
Incertae sedis\_Bacteroidetes\_Bacteria WP\_012845258:0.1035457863,Rubricoccus marinus  
@Rubricoccus\_Rubricoccaceae\_Rhodothermales\_Rhodothermia\_Rhodothermaeota\_Bacteria  
WP\_094550067:0.4048114881)91:0.0387099972)93:0.0718464658,Tolypothrix campylonemoides  
@Tolypothrix\_Tolypothrichaceae\_Nostocales\_Cyanobacteria\_Bacteria  
WP\_041039549:0.2024643348)100:0.1691631685)93:0.1039468967)71:0.0275837844)84:0.0228582897)100:0.094624  
6913,((Azospirillum oryzae  
@Azospirillum\_Rhodospirillaceae\_Rhodospirillales\_Alphaproteobacteria\_Proteobacteria\_Bacteria  
WP\_085085866:0.1338319095,Inquilinus limosus  
@Inquilinus\_Rhodospirillaceae\_Rhodospirillales\_Alphaproteobacteria\_Proteobacteria\_Bacteria  
WP\_026871538:0.1028369170)91:0.0301908191,Skermanella aerolata  
@Skermanella\_Rhodospirillaceae\_Rhodospirillales\_Alphaproteobacteria\_Proteobacteria\_Bacteria  
WP\_044431318:0.1406166391)100:0.2173128543)100:0.1111325829,(((Acidibacillus ferrooxidans  
@Acidibacillus\_Bacillales\_Bacilli\_Firmicutes\_Bacteria WP\_067560846:0.2015930340,Paenibacillus naphthalenovorans  
@Paenibacillus\_Paenibacillaceae\_Bacillales\_Bacilli\_Firmicutes\_Bacteria  
WP\_062410260:0.1003858020)100:0.0684858177,Alicyclobacillus acidiphilus  
@Alicyclobacillus\_Alicyclobacillaceae\_Bacillales\_Bacilli\_Firmicutes\_Bacteria  
WP\_067618653:0.1763857277)100:0.0884688534,((((((Aeribacillus pallidus  
@Aeribacillus\_Bacillaceae\_Bacillales\_Bacilli\_Firmicutes\_Bacteria WP\_094244441:0.0445794873,(Anoxybacillus  
tepidamans @Anoxybacillus\_Bacillaceae\_Bacillales\_Bacilli\_Firmicutes\_Bacteria  
WP\_027409719:0.0466361488,((Geobacillus galactosidasius  
@Geobacillus\_Bacillaceae\_Bacillales\_Bacilli\_Firmicutes\_Bacteria WP\_089098080:0.0000028719,Thermicanus aegyptius  
@Thermicanus\_Bacillales Family X. Incertae Sedis\_Bacillales\_Bacilli\_Firmicutes\_Bacteria  
WP\_005586697:0.0774645706)100:0.0041965177,Parageobacillus toebii @Bacillales\_Bacilli\_Firmicutes\_Bacteria  
WP\_062678358:0.0000027704)100:0.0398880433)100:0.0825248993)100:0.0725023112,((((((((((((((Alkalibacterium  
pelagium @Alkalibacterium\_Carnobacteriaceae\_Lactobacillales\_Bacilli\_Firmicutes\_Bacteria  
WP\_091480231:0.2438701386,Gracilibacillus halophilus  
@Gracilibacillus\_Bacillaceae\_Bacillales\_Bacilli\_Firmicutes\_Bacteria  
WP\_003470096:0.0839430137)70:0.0179960207,Paraliobacillus ryukyuensis  
@Paraliobacillus\_Bacillaceae\_Bacillales\_Bacilli\_Firmicutes\_Bacteria  
WP\_079707871:0.1154439446)100:0.1207800131,(((Alteribacillus iranensis  
@Alteribacillus\_Bacillaceae\_Bacillales\_Bacilli\_Firmicutes\_Bacteria SFE82728:0.0948078697,Virgibacillus necropolis  
@Virgibacillus\_Bacillaceae\_Bacillales\_Bacilli\_Firmicutes\_Bacteria  
WP\_089534071:0.1478069136)97:0.0312868127,(((Bacillus ainingensis  
@Bacillus\_Bacillaceae\_Bacillales\_Bacilli\_Firmicutes\_Bacteria WP\_026702567:0.0000022398,Salibacterium  
qingdaonense @Bacillaceae\_Bacillales\_Bacilli\_Firmicutes\_Bacteria  
WP\_090925054:0.0212531378)100:0.1233384235,Marinococcus luteus  
@Marinococcus\_Bacillaceae\_Bacillales\_Bacilli\_Firmicutes\_Bacteria  
WP\_091613962:0.0921087927)100:0.0369762034,((((((Kroppenstedtia eburnea

@Kroppenstedtia\_Thermoactinomycetaceae\_Bacillales\_Bacilli\_Firmicutes\_Bacteria  
SIS42085:0.0284965213,(Melghirimyces thermohalophilus  
@Melghirimyces\_Thermoactinomycetaceae\_Bacillales\_Bacilli\_Firmicutes\_Bacteria  
WP\_091572558:0.0276276213,Paludifilum halophilum  
@Paludifilum\_Thermoactinomycetaceae\_Bacillales\_Bacilli\_Firmicutes\_Bacteria  
WP\_094264887:0.0999036032)72:0.0166248791)72:0.0000020845,Numidum massiliense  
@Numidum\_Bacillaceae\_Bacillales\_Bacilli\_Firmicutes\_Bacteria  
WP\_054949484:0.0311603001)100:0.0772211081,Lentibacillus persicus  
@Lentibacillus\_Bacillaceae\_Bacillales\_Bacilli\_Firmicutes\_Bacteria  
WP\_090087065:0.0544547812)100:0.0994340496,Tenuibacillus multivorans  
@Tenuibacillus\_Bacillaceae\_Bacillales\_Bacilli\_Firmicutes\_Bacteria  
WP\_093856636:0.0635170021)100:0.0795046318,Piscibacillus halophilus  
@Piscibacillus\_Bacillaceae\_Bacillales\_Bacilli\_Firmicutes\_Bacteria  
WP\_091773624:0.0278369835)99:0.0474005727,Oceanobacillus iheyensis  
@Oceanobacillus\_Bacillaceae\_Bacillales\_Bacilli\_Firmicutes\_Bacteria  
WP\_011065038:0.0996507680)45:0.0100905172)70:0.0352883315)99:0.0616372268,Salinibacillus kushneri  
@Salinibacillus\_Bacillaceae\_Bacillales\_Bacilli\_Firmicutes\_Bacteria  
WP\_093137128:0.1830178975)95:0.0461479057)100:0.0774728896,Quasibacillus thermotolerans  
@Quasibacillus\_Bacillaceae\_Bacillales\_Bacilli\_Firmicutes\_Bacteria  
WP\_039237146:0.0623686921)95:0.0122414874,Virgibacillus soli  
@Virgibacillus\_Bacillaceae\_Bacillales\_Bacilli\_Firmicutes\_Bacteria  
WP\_057986261:0.0877834727)89:0.0345516323,(Chlamydia abortus @Chlamydia\_Chlamydia/Chlamydophila  
group\_Chlamydiaceae\_Chlamydiales\_Chlamydiae\_Bacteria SHE15245:0.0846784708,((Cohnella kolymensis  
@Cohnella\_Paenibacillaceae\_Bacillales\_Bacilli\_Firmicutes\_Bacteria WP\_041058476:0.0873586300,Paenibacillus  
camerounensis @Paenibacillus\_Paenibacillaceae\_Bacillales\_Bacilli\_Firmicutes\_Bacteria  
WP\_042203871:0.0640962395)99:0.0167375270,Domibacillus aminovorans  
@Domibacillus\_Bacillaceae\_Bacillales\_Bacilli\_Firmicutes\_Bacteria  
WP\_063965304:0.1301490890)7:0.0102164757)51:0.0190283503)2:0.0062438062,(Brevibacterium frigitolerans  
@Bacillus\_Bacillaceae\_Bacillales\_Bacilli\_Firmicutes\_Bacteria WP\_063589805:0.1519171814,Risungbinella massiliensis  
@Risungbinella\_Thermoactinomycetaceae\_Bacillales\_Bacilli\_Firmicutes\_Bacteria  
WP\_044640681:0.0458382134)2:0.0056580235)82:0.0236292890,Bacillus soli  
@Bacillus\_Bacillaceae\_Bacillales\_Bacilli\_Firmicutes\_Bacteria  
WP\_066064705:0.1536417001)94:0.0114538353,((Fictibacillus arsenicus  
@Fictibacillus\_Bacillaceae\_Bacillales\_Bacilli\_Firmicutes\_Bacteria WP\_066290043:0.0543252076,Thalassobacillus  
devorans @Thalassobacillus\_Bacillaceae\_Bacillales\_Bacilli\_Firmicutes\_Bacteria  
WP\_028783654:0.0965677267)98:0.0280139607,((Gorillibacterium massiliense  
@Gorillibacterium\_Paenibacillaceae\_Bacillales\_Bacilli\_Firmicutes\_Bacteria WP\_040949987:0.1123212846,Paenibacillus  
alginolyticus @Paenibacillus\_Paenibacillaceae\_Bacillales\_Bacilli\_Firmicutes\_Bacteria  
WP\_029195217:0.0701029191)97:0.0425251652,Streptococcus pneumoniae  
@Streptococcus\_Streptococcaceae\_Lactobacillales\_Bacilli\_Firmicutes\_Bacteria  
CJF61396:0.0334741107)31:0.0123200186)36:0.0200369092)25:0.0095916997,Terribacillus aidingensis  
@Terribacillus\_Bacillaceae\_Bacillales\_Bacilli\_Firmicutes\_Bacteria  
WP\_038564789:0.0926031711)23:0.0102130196,(Bacillus testis  
@Bacillus\_Bacillaceae\_Bacillales\_Bacilli\_Firmicutes\_Bacteria WP\_050616318:0.1379062580,Sporosarcina globispora  
@Sporosarcina\_Planococcaceae\_Bacillales\_Bacilli\_Firmicutes\_Bacteria  
WP\_053436003:0.0450690077)55:0.0413220013)81:0.0156352295,(Jeotgalibacillus soli  
@Jeotgalibacillus\_Planococcaceae\_Bacillales\_Bacilli\_Firmicutes\_Bacteria WP\_041087390:0.0519156002,(Planococcus  
kocurii @Planococcus\_Planococcaceae\_Bacillales\_Bacilli\_Firmicutes\_Bacteria  
WP\_058386576:0.0613620680,Planomicrobium glaciei

@Planomicrobium\_Planococcaceae\_Bacillales\_Bacilli\_Firmicutes\_Bacteria  
WP\_036802832:0.0247134560)100:0.1285137485)100:0.0814261674)63:0.0080232334,(Brevibacillus borstelensis  
@Brevibacillus\_Paenibacillaceae\_Bacillales\_Bacilli\_Firmicutes\_Bacteria WP\_003389645:0.0268324724,Seinonella  
peptonophila @Seinonella\_Thermoactinomycetaceae\_Bacillales\_Bacilli\_Firmicutes\_Bacteria  
WP\_073152289:0.1004661902)99:0.0327072297)86:0.0156037531,(Sediminibacillus halophilus  
@Sediminibacillus\_Bacillaceae\_Bacillales\_Bacilli\_Firmicutes\_Bacteria WP\_074600731:0.0159788713,Virgibacillus  
senegalensis @Virgibacillus\_Bacillaceae\_Bacillales\_Bacilli\_Firmicutes\_Bacteria  
WP\_053217524:0.0109062914)100:0.1225590153)86:0.0295954853,((Brochothrix campestris  
@Brochothrix\_Listeriaceae\_Bacillales\_Bacilli\_Firmicutes\_Bacteria WP\_035314486:0.3682049191,Sporolactobacillus  
vineae @Sporolactobacillus\_Sporolactobacillaceae\_Bacillales\_Bacilli\_Firmicutes\_Bacteria  
WP\_010630572:0.1326396441)72:0.0890939203,(Carnobacterium divergens  
@Carnobacterium\_Carnobacteriaceae\_Lactobacillales\_Bacilli\_Firmicutes\_Bacteria  
SPC41601:0.1613343862,(((Enterococcus plantarum  
@Enterococcus\_Enterococcaceae\_Lactobacillales\_Bacilli\_Firmicutes\_Bacteria  
WP\_069654240:0.1789346098,Lactobacillus curvatus  
@Lactobacillus\_Lactobacillaceae\_Lactobacillales\_Bacilli\_Firmicutes\_Bacteria  
WP\_089557236:0.3424157930)100:0.2520726003,(Floriccoccus tropicus  
@Floriccoccus\_Streptococcaceae\_Lactobacillales\_Bacilli\_Firmicutes\_Bacteria WP\_070791474:0.2129574312,Weissella  
minor @Weissella\_Leuconostocaceae\_Lactobacillales\_Bacilli\_Firmicutes\_Bacteria  
KRN77299:0.0750883038)100:0.3843287907)100:0.1255739581,Enterococcus sulfureus  
@Enterococcus\_Enterococcaceae\_Lactobacillales\_Bacilli\_Firmicutes\_Bacteria  
WP\_016186031:0.2790658747)94:0.1328714246)61:0.0430184924)69:0.0091464944)90:0.0265998056)100:0.0319440  
357,Pontibacillus yanchengensis @Pontibacillus\_Bacillaceae\_Bacillales\_Bacilli\_Firmicutes\_Bacteria  
WP\_036822790:0.2610180860)100:0.0210804361,Halobacillus hunanensis  
@Halobacillus\_Bacillaceae\_Bacillales\_Bacilli\_Firmicutes\_Bacteria  
WP\_079525393:0.1795451681)100:0.0972310647,Caenibacillus caldisaponilyticus  
@Caenibacillus\_Sporolactobacillaceae\_Bacillales\_Bacilli\_Firmicutes\_Bacteria  
WP\_077615303:0.1004900830)100:0.0748704059,Novibacillus thermophilus  
@Novibacillus\_Thermoactinomycetaceae\_Bacillales\_Bacilli\_Firmicutes\_Bacteria  
WP\_077720394:0.1372792485)98:0.0540288863)100:0.0462688098)99:0.0605376542,((Calothrix parietina  
@Calothrix\_Rivulariaceae\_Nostocales\_Cyanobacteria\_Bacteria WP\_015196241:0.3439169707,Rubritalea profundi  
@Rubritalea\_Rubritaleaceae\_Verrucomicrobiales\_Verrucomicrobiae\_Verrucomicrobia\_Bacteria  
WP\_105043638:0.6185465823)85:0.0318162085,Ktedonobacter racemifer  
@Ktedonobacter\_Ktedonobacteraceae\_Ktedonobacteriales\_Ktedonobacteria\_Chloroflexi\_Bacteria  
WP\_007915547:0.3644547654)100:0.0886017795)100:0.0737477816,((((Akkermansia glycaniphila  
@Akkermansia\_Akkermansiaceae\_Verrucomicrobiales\_Verrucomicrobiae\_Verrucomicrobia\_Bacteria  
WP\_067777657:0.3134417742,Mucispirillum schaedleri  
@Mucispirillum\_Deferribacteraceae\_Deferribacteriales\_Deferribacteres\_Bacteria  
WP\_023275781:0.3564461331)100:0.1027477185,Methanobrevibacter cuticularis  
@Methanobrevibacter\_Methanobacteriaceae\_Methanobacteriales\_Methanobacteria\_Euryarchaeota\_Archaea  
WP\_067259161:0.3341699529)100:0.1027281731,(Desulfotomaculum ruminis  
@Desulfotomaculum\_Peptococcaceae\_Clostridiales\_Clostridia\_Firmicutes\_Bacteria  
WP\_013841441:0.3353210611,(Dysgonomonas gadei  
@Dysgonomonas\_Dysgonomonadaceae\_Bacteroidales\_Bacteroidia\_Bacteroidetes\_Bacteria  
WP\_006800148:0.3006348031,Methanomassiliococcus luminyensis  
@Methanomassiliococcus\_Methanomassiliococcaceae\_Methanomassiliococcales\_Thermoplasmata\_Euryarchaeota\_Archaea  
WP\_019178123:0.4353218904)68:0.0436525285)68:0.0204507479)98:0.0514134482,Deinococcus misasensis  
@Deinococcus\_Deinococcaceae\_Deinococcales\_Deinococci\_Deinococcus-Thermus\_Bacteria  
WP\_034342422:0.6367869587)98:0.0268903460,((((Desulfarculus baarsii

@Desulfarculus\_Desulfarculaceae\_Desulfarculales\_Deltaproteobacteria\_Proteobacteria\_Bacteria  
WP\_013257625:0.0715096167,(Desulfovibrio alkalitolerans

@Desulfohalovibrio\_Desulfovibrionaceae\_Desulfovibrionales\_Deltaproteobacteria\_Proteobacteria\_Bacteria  
WP\_020887383:0.1206489193,(Methanococcoides vulcani

@Methanococcoides\_Methanosarcinaceae\_Methanosarcinales\_Methanomicrobia\_Euryarchaeota\_Archaea  
WP\_091690036:0.0594081814,((Methanolobus psychrophilus

@Methanolobus\_Methanosarcinaceae\_Methanosarcinales\_Methanomicrobia\_Euryarchaeota\_Archaea  
WP\_015053150:0.0839971537,Methanosarcina barkeri

@Methanosarcina\_Methanosarcinaceae\_Methanosarcinales\_Methanomicrobia\_Stenosarchaea  
group\_Euryarchaeota\_Archaea WP\_011305841:0.0515268592)100:0.0115627219,Methanosalsum zhilinae

@Methanosalsum\_Methanosarcinaceae\_Methanosarcinales\_Methanomicrobia\_Stenosarchaea  
group\_Euryarchaeota\_Archaea  
WP\_013898966:0.0702327219)100:0.0134080826)100:0.0797215416)100:0.0249982493)86:0.0125948497,Desulfobacc  
a acetoxidans @Desulfobacca\_Syntrophaceae\_Syntrophobacteriales\_Deltaproteobacteria\_Proteobacteria\_Bacteria  
WP\_013706143:0.1495177408)96:0.0297736858,Desulfocarbo indianensis

@Desulfocarbo\_Desulfarculaceae\_Desulfarculales\_Deltaproteobacteria\_Proteobacteria\_Bacteria  
WP\_049673636:0.1206356591)96:0.0364488381,(Desulfocurvus vexinensis

@Desulfocurvus\_Desulfovibrionaceae\_Desulfovibrionales\_Deltaproteobacteria\_Proteobacteria\_Bacteria  
WP\_028588583:0.1191967434,(Halodesulfovibrio aestuarii

@Halodesulfovibrio\_Desulfovibrionaceae\_Desulfovibrionales\_Deltaproteobacteria\_Proteobacteria\_Bacteria  
WP\_027362245:0.1468686499,Pseudodesulfovibrio aespoensis

@Desulfovibrionaceae\_Desulfovibrionales\_Deltaproteobacteria\_Proteobacteria\_Bacteria  
WP\_013513775:0.0278071054)100:0.0762862138)100:0.0871504100)100:0.2055232586)99:0.1004485690)78:0.02064  
52436,((((((((((((((((Acanthisitta chloris

@Acanthisitta\_Acanthisittidae\_Passeriformes\_Neognathae\_Aves\_Coelurosauria\_Theropoda\_Saurischia\_Dinosauria\_Arc  
hosauria\_Archelosauria\_Euteleostomi\_Vertebrata\_Craniata\_Chordata\_Metazoa\_Eukaryota  
KFP73266:0.0089028638,((Corvus cornix cornix

@Corvus\_Corvidae\_Corvoidea\_Passeriformes\_Neognathae\_Aves\_Coelurosauria\_Theropoda\_Saurischia\_Dinosauria\_Arc  
hosauria\_Archelosauria\_Euteleostomi\_Vertebrata\_Craniata\_Chordata\_Metazoa\_Eukaryota  
XP\_019149262:0.0048449075,(Lonchura striata domestica

@Lonchura\_Estrildinae\_Estrildidae\_Passeroidea\_Passeriformes\_Neognathae\_Aves\_Coelurosauria\_Theropoda\_Saurischi  
a\_Dinosauria\_Archosauria\_Archelosauria\_Euteleostomi\_Vertebrata\_Craniata\_Chordata\_Metazoa\_Eukaryota  
XP\_021411590:0.0170761407,Manacus vitellinus

@Manacus\_Pipridae\_Passeriformes\_Neognathae\_Aves\_Coelurosauria\_Theropoda\_Saurischia\_Dinosauria\_Archosauria\_  
Archelosauria\_Euteleostomi\_Vertebrata\_Craniata\_Chordata\_Metazoa\_Eukaryota  
KFW74074:0.0359000355)42:0.0004525154)50:0.0044425480,Cyanistes caeruleus

@Cyanistes\_Paridae\_Passeriformes\_Neognathae\_Aves\_Coelurosauria\_Theropoda\_Saurischia\_Dinosauria\_Archosauria\_  
Archelosauria\_Euteleostomi\_Vertebrata\_Craniata\_Chordata\_Metazoa\_Eukaryota  
XP\_023784204:0.0085444082)100:0.0271669924)58:0.0088669165,(Columba livia

@Columba\_Columbidae\_Columbiformes\_Neognathae\_Aves\_Coelurosauria\_Theropoda\_Saurischia\_Dinosauria\_Archosa  
uria\_Archelosauria\_Euteleostomi\_Vertebrata\_Craniata\_Chordata\_Metazoa\_Eukaryota  
XP\_005511099:0.0000027612,Patagioenas fasciata monilis

@Patagioenas\_Columbidae\_Columbiformes\_Neognathae\_Aves\_Coelurosauria\_Theropoda\_Saurischia\_Dinosauria\_Arch  
osauria\_Archelosauria\_Euteleostomi\_Vertebrata\_Craniata\_Chordata\_Metazoa\_Eukaryota  
OPJ74063:0.0086820364)100:0.0355591168)59:0.0046765949,(Buceros rhinoceros silvestris

@Buceros\_Bucerotidae\_Bucerotiformes\_Neognathae\_Aves\_Coelurosauria\_Theropoda\_Saurischia\_Dinosauria\_Archosau  
ria\_Archelosauria\_Euteleostomi\_Vertebrata\_Craniata\_Chordata\_Metazoa\_Eukaryota KFO89341:0.0368773449,Nestor  
notabilis

@Nestor\_Psittacidae\_Psittaciformes\_Neognathae\_Aves\_Coelurosauria\_Theropoda\_Saurischia\_Dinosauria\_Archosauria

\_Archelosauria\_Euteleostomi\_Vertebrata\_Craniata\_Chordata\_Metazoa\_Eukaryota  
KFQ41818:0.0070359618)99:0.0102983828)97:0.0047657527,(Antrostomus carolinensis  
@Antrostomus\_Caprimulgidae\_Caprimulgiformes\_Neognathae\_Aves\_Coelurosauria\_Theropoda\_Saurischia\_Dinosauria  
\_Archosauria\_Archelosauria\_Euteleostomi\_Vertebrata\_Craniata\_Chordata\_Metazoa\_Eukaryota  
KFZ50498:0.0080311418,Egretta garzetta  
@Egretta\_Ardeidae\_Pelecaniformes\_Neognathae\_Aves\_Coelurosauria\_Theropoda\_Saurischia\_Dinosauria\_Archosauria\_  
Archelosauria\_Euteleostomi\_Vertebrata\_Craniata\_Chordata\_Metazoa\_Eukaryota  
KFP14470:0.0134170787)92:0.0085840526)92:0.0037929531,(Haliaeetus albicilla  
@Haliaeetus\_Accipitrinae\_Accipitridae\_Falconiformes\_Neognathae\_Aves\_Coelurosauria\_Theropoda\_Saurischia\_Dinosa  
uria\_Archosauria\_Archelosauria\_Euteleostomi\_Vertebrata\_Craniata\_Chordata\_Metazoa\_Eukaryota  
KFQ09747:0.0042457198,Leptosomus discolor  
@Leptosomus\_Leptosomidae\_Coraciiformes\_Neognathae\_Aves\_Coelurosauria\_Theropoda\_Saurischia\_Dinosauria\_Arch  
osauria\_Archelosauria\_Euteleostomi\_Vertebrata\_Craniata\_Chordata\_Metazoa\_Eukaryota  
KFQ13842:0.0128297177)87:0.0000029698)95:0.0000024625,Eurypyga helias  
@Eurypyga\_Eurypygidae\_Gruiformes\_Neognathae\_Aves\_Coelurosauria\_Theropoda\_Saurischia\_Dinosauria\_Archosauria  
\_Archelosauria\_Euteleostomi\_Vertebrata\_Craniata\_Chordata\_Metazoa\_Eukaryota  
KFV95075:0.0042851582)94:0.0042617550,((Aptenodytes forsteri  
@Aptenodytes\_Spheniscidae\_Sphenisciformes\_Neognathae\_Aves\_Coelurosauria\_Theropoda\_Saurischia\_Dinosauria\_Ar  
chosauria\_Archelosauria\_Euteleostomi\_Vertebrata\_Craniata\_Chordata\_Metazoa\_Eukaryota  
KFM01548:0.0000023247,Pygoscelis adeliae  
@Pygoscelis\_Spheniscidae\_Sphenisciformes\_Neognathae\_Aves\_Coelurosauria\_Theropoda\_Saurischia\_Dinosauria\_Arch  
osauria\_Archelosauria\_Euteleostomi\_Vertebrata\_Craniata\_Chordata\_Metazoa\_Eukaryota  
KFW62695:0.0000023247)100:0.0085812396,Balearica regulorum gibbericeps  
@Balearica\_Gruidae\_Gruiformes\_Neognathae\_Aves\_Coelurosauria\_Theropoda\_Saurischia\_Dinosauria\_Archosauria\_Arc  
helosauria\_Euteleostomi\_Vertebrata\_Craniata\_Chordata\_Metazoa\_Eukaryota  
KFO10016:0.0000022151)96:0.0042496764,(Fulmarus glacialis  
@Fulmarus\_Procellariidae\_Procellariiformes\_Neognathae\_Aves\_Coelurosauria\_Theropoda\_Saurischia\_Dinosauria\_Arch  
osauria\_Archelosauria\_Euteleostomi\_Vertebrata\_Craniata\_Chordata\_Metazoa\_Eukaryota  
KFV90292:0.0400369529,Podiceps cristatus  
@Podiceps\_Podicipedidae\_Podicipediformes\_Neognathae\_Aves\_Coelurosauria\_Theropoda\_Saurischia\_Dinosauria\_Arc  
hosauria\_Archelosauria\_Euteleostomi\_Vertebrata\_Craniata\_Chordata\_Metazoa\_Eukaryota  
KFZ69041:0.0085341006)79:0.0000021381)71:0.0000022662)97:0.0042534196,Nipponia nippon  
@Nipponia\_Threskiornithidae\_Pelecaniformes\_Neognathae\_Aves\_Coelurosauria\_Theropoda\_Saurischia\_Dinosauria\_Ar  
chosauria\_Archelosauria\_Euteleostomi\_Vertebrata\_Craniata\_Chordata\_Metazoa\_Eukaryota  
KFQ94150:0.0085964217)97:0.0079036046,(Gallus gallus  
@Gallus\_Phasianinae\_Phasianidae\_Galliformes\_Galloanserae\_Neognathae\_Aves\_Coelurosauria\_Theropoda\_Saurischia  
\_Dinosauria\_Archosauria\_Archelosauria\_Euteleostomi\_Vertebrata\_Craniata\_Chordata\_Metazoa\_Eukaryota  
NP\_001026386:0.0121294910,Numida meleagris  
@Numida\_Numididae\_Galliformes\_Galloanserae\_Neognathae\_Aves\_Coelurosauria\_Theropoda\_Saurischia\_Dinosauria\_  
Archosauria\_Archelosauria\_Euteleostomi\_Vertebrata\_Craniata\_Chordata\_Metazoa\_Eukaryota  
XP\_021258124:0.0136434621)100:0.0407287842)100:0.0415305027,Pelodiscus sinensis  
@Pelodiscus\_Trionychidae\_Trionychia\_Cryptodira\_Testudines\_Archelosauria\_Euteleostomi\_Vertebrata\_Craniata\_Chord  
ata\_Metazoa\_Eukaryota NP\_001273863:0.0774860047)61:0.0256744834,((Carassius auratus ssp. Pengze  
@Carassius\_Cyprinidae\_Cypriniformes\_Ostariophysi\_Teleostei\_Neopterygii\_Actinopterygii\_Euteleostomi\_Vertebrata\_C  
raniata\_Chordata\_Metazoa\_Eukaryota AGC50801:0.1365754981,Protopterus annectens  
@Protopterus\_Protopteridae\_Lepidosireniformes\_Dipnoi\_Euteleostomi\_Vertebrata\_Craniata\_Chordata\_Metazoa\_Euka  
ryota AGV06209:0.1059244432)93:0.0190611740,Xenopus laevis  
@Xenopus\_Xenopus\_Xenopodinae\_Pipidae\_Pipoidea\_Anura\_Batrachia\_Amphibia\_Euteleostomi\_Vertebrata\_Craniata\_  
Chordata\_Metazoa\_Eukaryota ABK62836:0.1605094732)56:0.0115694065)66:0.0046142503,(((Bos taurus

@Bos\_Bovinae\_Bovidae\_Pecora\_Ruminantia\_Cetartiodactyla\_Laurasiatheria\_Eutheria\_Mammalia\_Euteleostomi\_Vertebrata\_Craniata\_Chordata\_Metazoa\_Eukaryota NP\_001030463:0.0459219762,(Homo sapiens

@Homo\_Hominidae\_Catarrhini\_Haplorrhini\_Primates\_Euarchontoglires\_Eutheria\_Mammalia\_Euteleostomi\_Vertebrata\_Craniata\_Chordata\_Metazoa\_Eukaryota AAK29181:0.0494848687,Phascolarctos cinereus

@Phascolarctos\_Phascolarctidae\_Diprotodontia\_Metatheria\_Mammalia\_Euteleostomi\_Vertebrata\_Craniata\_Chordata\_Metazoa\_Eukaryota XP\_020819557:0.0874653434)96:0.0307006955)93:0.0191192270,Felis catus

@Felis\_Felinae\_Felidae\_Feliformia\_Carnivora\_Laurasiatheria\_Eutheria\_Mammalia\_Euteleostomi\_Vertebrata\_Craniata\_Chordata\_Metazoa\_Eukaryota XP\_003993206:0.0212681759)92:0.0294332857,Mus musculus

@Mus\_Mus\_Murinae\_Muridae\_Muroidea\_Myomorpha\_Rodentia\_Glires\_Euarchontoglires\_Eutheria\_Mammalia\_Euteleostomi\_Vertebrata\_Craniata\_Chordata\_Metazoa\_Eukaryota NP\_033934:0.0270298357)94:0.0320380781)100:0.2264771956,(Penaeus monodon

@Penaeus\_Penaeidae\_Penaeoidea\_Dendrobranchiata\_Decapoda\_Eucarida\_Eumalacostraca\_Malacostraca\_Crustacea\_Arthropoda\_Ecdysozoa\_Metazoa\_Eukaryota ALM09355:0.0657539503,Portunus trituberculatus

@Portunus\_Portunidae\_Portunoidea\_Eubrachyura\_Brachyura\_Pleocyemata\_Decapoda\_Eucarida\_Eumalacostraca\_Malacostraca\_Crustacea\_Arthropoda\_Ecdysozoa\_Metazoa\_Eukaryota ACI13850:0.1275517281)100:0.0959915592)54:0.0213264959,((((Bombyx mori

@Bombyx\_Bombycinae\_Bombycidae\_Bombycoidea\_Ditrysia\_Glossata\_Lepidoptera\_Holometabola\_Neoptera\_Pterygota\_Insecta\_Hexapoda\_Arthropoda\_Ecdysozoa\_Metazoa\_Eukaryota NP\_001036912:0.2792061881,Drosophila obscura

@Sophophora\_Drosophila\_Drosophilidae\_Ephydroidea\_Muscomorpha\_Brachycera\_Diptera\_Holometabola\_Neoptera\_Pterygota\_Insecta\_Hexapoda\_Arthropoda\_Ecdysozoa\_Metazoa\_Eukaryota XP\_022221427:0.2185664817)100:0.1229501923,Camponotus floridanus

@Camponotus\_Formicinae\_Formicidae\_Vespoidea\_Aculeata\_Apocrita\_Hymenoptera\_Holometabola\_Neoptera\_Pterygota\_Insecta\_Hexapoda\_Arthropoda\_Ecdysozoa\_Metazoa\_Eukaryota EFN66292:0.2297158758)95:0.0390271198,Locusta migratoria manilensis

@Locusta\_Oedipodinae\_Acrididae\_Acridoidea\_Acridomorpha\_Acridea\_Caelifera\_Orthoptera\_Polyneoptera\_Neoptera\_Pterygota\_Insecta\_Hexapoda\_Arthropoda\_Ecdysozoa\_Metazoa\_Eukaryota AOG21082:0.1553260651)99:0.0427783803,Toxocara canis

@Toxocara\_Toxocaridae\_Ascaridoidea\_Ascaridida\_Chromadorea\_Nematoda\_Ecdysozoa\_Metazoa\_Eukaryota KHN75905:0.5119322441)94:0.0596994182,((Crassostrea hongkongensis

@Crassostrea\_Ostreidae\_Ostreoidea\_Ostreoida\_Pteriomorpha\_Bivalvia\_Mollusca\_Lophotrochozoa\_Metazoa\_Eukaryota ADZ76134:0.2174859959,Octopus vulgaris

@Octopus\_Octopodidae\_Incirrata\_Octopoda\_Octopodiformes\_Neocoleoidea\_Coleoidea\_Cephalopoda\_Mollusca\_Lophotrochozoa\_Metazoa\_Eukaryota AGZ63441:0.1903649015)100:0.0596777073,(Eisenia fetida

@Eisenia\_Lumbricinae\_Lumbricidae\_Lumbricina\_Haplotaxida\_Oligochaeta\_Clitellata\_Annelida\_Lophotrochozoa\_Metazoa\_Eukaryota AEO50756:0.3872004363,Perinereis aibuhitensis

@Perinereis\_Nereididae\_Phyllodocida\_Aciculata\_Palpata\_Polychaeta\_Annelida\_Lophotrochozoa\_Metazoa\_Eukaryota AHY86343:0.2436466822)95:0.0660521646)84:0.0323340553)91:0.0456898981)96:0.0981836638,((((Aphanomyces astaci @Aphanomyces\_Saprolegniaceae\_Saprolegniales\_Oomycetes\_Stramenopiles\_Eukaryota RHZ15061:0.1339938022,(Achlya hypogyna

@Achlya\_Saprolegniaceae\_Saprolegniales\_Oomycetes\_Stramenopiles\_Eukaryota OQR84492:0.0461407583,Saprolegnia diclina VS20 @Saprolegnia\_Saprolegniaceae\_Saprolegniales\_Oomycetes\_Stramenopiles\_Eukaryota XP\_008617088:0.0738481678)100:0.0776856540)100:0.1463797862,((Phytophthora parasitica P1569

@Phytophthora\_Peronosporales\_Oomycetes\_Stramenopiles\_Eukaryota ETI55580:0.0966476684,Phytophthora sojae

@Phytophthora\_Peronosporales\_Oomycetes\_Stramenopiles\_Eukaryota XP\_009527353:0.1654292377)56:0.0448577348,Pythium oligandrum

@Pythium\_Pythiaceae\_Pythiales\_Oomycetes\_Stramenopiles\_Eukaryota TMW58298:0.2172462929)100:0.0644063198)100:0.1361711470,Fistulifera solaris

@Fistulifera\_Naviculaceae\_Naviculales\_Bacillariophycidae\_Bacillariophyceae\_Bacillariophyta\_Stramenopiles\_Eukaryota GAX17996:0.3682953009)100:0.0440983945,(Nannochloropsis gaditana



@Nannochloropsis\_Monodopsidaceae\_Eustigmatales\_Eustigmatophyceae\_Stromboliales\_Eukaryota  
EWM20937:0.0082267766,Nannochloropsis salina CCMP1776 @Microchloropsis  
salina\_Microchloropsis\_Monodopsidaceae\_Eustigmatales\_Eustigmatophyceae\_Stromboliales\_Eukaryota  
TFJ82773:0.0087639525)100:0.1999472930)100:0.0807459434)100:0.3243746265,((Basidiobolus meristosporus CBS  
931.73  
@Basidiobolus\_Basidiobolaceae\_Basidiobolales\_Basidiobolomycetes\_Entomophthoromycotina\_Zoopagomycota\_Fungi\_  
Eukaryota ORY01796:0.1561755504,(Mucor ambiguus  
@Mucor\_Mucoraceae\_Mucorineae\_Mucorales\_Mucoromycotina\_Mucoromycota\_Fungi\_Eukaryota  
GAN01536:0.0733179637,Rhizopus microsporus  
@Rhizopus\_Rhizopodaceae\_Mucorineae\_Mucorales\_Mucoromycotina\_Mucoromycota\_Fungi\_Eukaryota  
CEG67568:0.0698658425)100:0.1183312210)100:0.1966430474,(((Oxytricha trifallax  
@Oxytricha\_Oxytrichinae\_Oxytrichidae\_Sporadotrichida\_Stichotrichia\_Spirotrichea\_Intramacronucleata\_Ciliophora\_Alveolata\_Eukaryota  
EJY78794:0.0840639828,Stylonychia lemnae  
@Stylonychia\_Stylonychinae\_Oxytrichidae\_Sporadotrichida\_Stichotrichia\_Spirotrichea\_Intramacronucleata\_Ciliophora\_Alveolata\_Eukaryota  
CDW81170:0.1375539831)100:0.3409798474,((Tetrahymena thermophila SB210  
@Tetrahymena\_Tetrahymenidae\_Tetrahymenina\_Hymenostomatida\_Oligohymenophorea\_Intramacronucleata\_Ciliophora\_Alveolata\_Eukaryota  
XP\_001026590:0.1611247828,Paramecium tetraurelia strain d4-2  
@Paramecium\_Parameciidae\_Peniculida\_Oligohymenophorea\_Intramacronucleata\_Ciliophora\_Alveolata\_Eukaryota  
XP\_001450296:0.2566902175)63:0.0671894324,Plasmodiophora brassicae  
@Plasmodiophora\_Plasmodiophoridae\_Plasmodiophorida\_Imbricatea\_Cercozoa\_Rhizaria\_Eukaryota  
CEO97147:0.4521296198)84:0.0588709453)99:0.0543269031,(((Toxoplasma gondii ME49  
@Toxoplasma\_Sarcocystidae\_Eimeriorina\_Eucoccidiorida\_Coccidia\_Conoidasida\_Apicomplexa\_Alveolata\_Eukaryota  
XP\_002368095:0.0000023268,Hammondia hammondi  
@Hammondia\_Sarcocystidae\_Eimeriorina\_Eucoccidiorida\_Coccidia\_Conoidasida\_Apicomplexa\_Alveolata\_Eukaryota  
KEP63689:0.0084064801)100:0.0349076326,Neospora caninum Liverpool  
@Neospora\_Sarcocystidae\_Eimeriorina\_Eucoccidiorida\_Coccidia\_Conoidasida\_Apicomplexa\_Alveolata\_Eukaryota  
XP\_003883469:0.0781026336)100:0.3582475588,Vitrella brassicaformis @Vitrella\_Chromerida\_Alveolata\_Eukaryota  
AND95675:0.1972696722)100:0.1629941855)86:0.0614465668)64:0.0364366294)53:0.0340927246,(Acanthamoeba castellanii @Acanthamoeba\_Acanthamoebidae\_Centramoebida\_Longamoebia\_Discosea\_Amoebozoa\_Eukaryota  
XP\_004337981:0.2974592797,((Dictyostelium discoideum  
@Dictyostelium\_Dictyosteliida\_Mycetozoa\_Amoebozoa\_Eukaryota AAC36743:0.1293274778,(Acytostelium subglobosum LB1 @Acytostelium\_Dictyosteliida\_Mycetozoa\_Amoebozoa\_Eukaryota  
XP\_012758538:0.0663382908,Cavenderia fasciculata  
@Cavenderia\_Cavenderiaceae\_Acytosteliales\_Dictyostelids\_Mycetozoa\_Amoebozoa\_Eukaryota  
XP\_004355480:0.0886457860)100:0.0208319273)91:0.0274998385,Tieghemostelium lacteum  
@Tieghemostelium\_Raperosteliaceae\_Dictyosteliales\_Dictyostelids\_Mycetozoa\_Amoebozoa\_Eukaryota  
AGC69744:0.0821501099)100:0.1658421897)100:0.1024952410)93:0.0616302915)100:0.6901944555,((Pyropia haitanensis @Pyropia\_Bangiaceae\_Bangiales\_Bangiophyceae\_Rhodophyta\_Eukaryota  
AJA71274:0.1233947745,Pyropia yezoensis @Pyropia\_Bangiaceae\_Bangiales\_Bangiophyceae\_Rhodophyta\_Eukaryota  
ADO23652:0.0785126040)100:0.0729864074,Porphyrula umbilicalis  
@Porphyrula\_Bangiaceae\_Bangiales\_Bangiophyceae\_Rhodophyta\_Eukaryota  
OSX73109:0.2768928258)100:1.3097377070)100:0.3615151100,((((((((((((Bassia scoparia  
@Bassia\_Camphorosmeae\_Camphorosmoideae\_Chenopodiaceae\_Caryophyllales\_Pentapetalae\_Gunneridae\_eudicotyledons\_Magnoliophyta\_Spermatophyta\_Tracheophyta\_Embryophyta\_Streptophyta\_Viridiplantae\_Eukaryota  
AIP93616:0.0308248542,Beta vulgaris subsp. vulgaris  
@Beta\_Betoideae\_Chenopodiaceae\_Caryophyllales\_Pentapetalae\_Gunneridae\_eudicotyledons\_Magnoliophyta\_Spermatophyta\_Tracheophyta\_Embryophyta\_Streptophyta\_Viridiplantae\_Eukaryota  
XP\_010692546:0.0421971660)92:0.0128064383,Spinacia oleracea  
@Spinacia\_Ansarineae\_Chenopodiaceae\_Chenopodiaceae\_Caryophyllales\_Pentapetalae\_Gunneridae\_eudicotyledons\_

Magnoliophyta\_Spermatophyta\_Tracheophyta\_Embryophyta\_Streptophyta\_Viridiplantae\_Eukaryota  
XP\_021845231:0.0141728492)99:0.0373520844,Mesembryanthemum crystallinum  
@Cryophytum\_Mesembryanthemum\_Aizoaceae\_Caryophyllales\_Pentapetalae\_Gunneridae\_eudicotyledons\_Magnoliophyta\_Spermatophyta\_Tracheophyta\_Embryophyta\_Streptophyta\_Viridiplantae\_Eukaryota  
AAC19397:0.0524467824)93:0.0354835282,((Brachypodium distachyon  
@Brachypodium\_Brachypodieae\_Pooideae\_BOP  
clade\_Poaceae\_Poales\_Liliopsida\_Magnoliophyta\_Spermatophyta\_Tracheophyta\_Embryophyta\_Streptophyta\_Viridiplantae\_Eukaryota XP\_003558892:0.0076161350,(Triticum aestivum  
@Triticum\_Triticinae\_Triticeae\_Triticodae\_Pooideae\_BOP  
clade\_Poaceae\_Poales\_Liliopsida\_Magnoliophyta\_Spermatophyta\_Tracheophyta\_Embryophyta\_Streptophyta\_Viridiplantae\_Eukaryota AIZ77475:0.0000029032,Triticum aestivum @Triticum\_Triticinae\_Triticeae\_Triticodae\_Pooideae\_BOP  
clade\_Poaceae\_Poales\_Liliopsida\_Magnoliopsida\_Spermatophyta\_Tracheophyta\_Embryophyta\_Streptophyta\_Viridiplantae\_Eukaryota Q43206:0.0042548308)100:0.0648797926)100:0.0342981937,(Oryza brachyantha  
@Oryza\_Oryzinae\_Oryzeae\_Oryzoideae\_BOP  
clade\_Poaceae\_Poales\_Liliopsida\_Magnoliophyta\_Spermatophyta\_Tracheophyta\_Embryophyta\_Streptophyta\_Viridiplantae\_Eukaryota XP\_006649332:0.0000023444,Oryza sativa Japonica Group  
@Oryza\_Oryzinae\_Oryzeae\_Oryzoideae\_BOP  
clade\_Poaceae\_Poales\_Liliopsida\_Magnoliophyta\_Spermatophyta\_Tracheophyta\_Embryophyta\_Streptophyta\_Viridiplantae\_Eukaryota XP\_015629749:0.0251132815)100:0.0028779593)100:0.0863188496)91:0.0244233219,((Glycine max  
@Soja\_Glycine\_Phaseoleae\_indigoferoid/millettioid clade\_NPAAA clade\_50 kb inversion  
clade\_Papilionoideae\_Fabaceae\_Fabales\_fabids\_rosids\_Pentapetalae\_Gunneridae\_eudicotyledons\_Magnoliopsida\_Spermatophyta\_Tracheophyta\_Embryophyta\_Streptophyta\_Viridiplantae\_Eukaryota NP\_001237556:0.0170038778,Glycine max @Soja\_Glycine\_Phaseoleae\_indigoferoid/millettioid clade\_NPAAA clade\_50 kb inversion  
clade\_Papilionoideae\_Fabaceae\_Fabales\_fabids\_rosids\_Pentapetalae\_Gunneridae\_eudicotyledons\_Magnoliopsida\_Spermatophyta\_Tracheophyta\_Embryophyta\_Streptophyta\_Viridiplantae\_Eukaryota  
NP\_001235974:0.0042145431)100:0.0412085640,Glycine max @Soja\_Glycine\_Phaseoleae\_indigoferoid/millettioid clade\_NPAAA clade\_50 kb inversion  
clade\_Papilionoideae\_Fabaceae\_Fabales\_fabids\_rosids\_Pentapetalae\_Gunneridae\_eudicotyledons\_Magnoliopsida\_Spermatophyta\_Tracheophyta\_Embryophyta\_Streptophyta\_Viridiplantae\_Eukaryota  
NP\_001237571:0.0762774642)100:0.0294582179)94:0.0333081758,(((Brassica oleracea var. oleracea  
@Brassica\_Brassicaceae\_Brassicaceae\_Brassicales\_malvids\_rosids\_Pentapetalae\_Gunneridae\_eudicotyledons\_Magnoliophyta\_Spermatophyta\_Tracheophyta\_Embryophyta\_Streptophyta\_Viridiplantae\_Eukaryota  
XP\_013597488:0.0000023247,Brassica napus  
@Brassica\_Brassicaceae\_Brassicaceae\_Brassicales\_malvids\_rosids\_Pentapetalae\_Gunneridae\_eudicotyledons\_Magnoliophyta\_Spermatophyta\_Tracheophyta\_Embryophyta\_Streptophyta\_Viridiplantae\_Eukaryota  
XP\_013704129:0.0041645941)100:0.0045501088,Brassica rapa  
@Brassica\_Brassicaceae\_Brassicaceae\_Brassicales\_malvids\_rosids\_Pentapetalae\_Gunneridae\_eudicotyledons\_Magnoliophyta\_Spermatophyta\_Tracheophyta\_Embryophyta\_Streptophyta\_Viridiplantae\_Eukaryota  
VDC97981:0.0038218795)100:0.0128731985,(Arabidopsis thaliana  
@Arabidopsis\_Camelinae\_Brassicaceae\_Brassicales\_malvids\_rosids\_Pentapetalae\_Gunneridae\_eudicotyledons\_Magnoliophyta\_Spermatophyta\_Tracheophyta\_Embryophyta\_Streptophyta\_Viridiplantae\_Eukaryota  
NP\_564121:0.0037199337,Arabidopsis lyrata subsp. lyrata  
@Arabidopsis\_Camelinae\_Brassicaceae\_Brassicales\_malvids\_rosids\_Pentapetalae\_Gunneridae\_eudicotyledons\_Magnoliophyta\_Spermatophyta\_Tracheophyta\_Embryophyta\_Streptophyta\_Viridiplantae\_Eukaryota  
XP\_020866686:0.0087703340)100:0.0356611437)100:0.0763191757)100:0.1184887774,((Auxenochlorella protothecoides @Auxenochlorella\_Chlorellaceae\_Chlorellales\_Trebouxiophyceae\_Chlorophyta\_Viridiplantae\_Eukaryota  
XP\_011396830:0.3664369474,Chlorella sorokiniana  
@Chlorella\_Chlorellaceae\_Chlorellales\_Trebouxiophyceae\_Chlorophyta\_Viridiplantae\_Eukaryota  
PRW57738:0.1185992698)83:0.0327381903,Coccomyxa subellipsoidea C-169

@Coccomyxa\_Coccomyxaceae\_Trebouxiophyceae incertae  
sedis\_Trebouxiophyceae\_Chlorophyta\_Viridiplantae\_Eukaryota  
XP\_005645077:0.1299473810)76:0.0170090578)93:0.1308224812,Ulva prolifera  
@Ulva\_Ulvaceae\_Ulvales\_Ulvophyceae\_Chlorophyta\_Viridiplantae\_Eukaryota  
AKA94107:0.1917208931)53:0.0332916894,((Chlamydomonas reinhardtii  
@Chlamydomonas\_Chlamydomonadaceae\_Chlamydomonadales\_Chlorophyceae\_Chlorophyta\_Viridiplantae\_Eukaryota  
XP\_001696763:0.0382687025,Gonium pectorale  
@Gonium\_Volvocaceae\_Chlamydomonadales\_Chlorophyceae\_Chlorophyta\_Viridiplantae\_Eukaryota  
KXZ42175:0.0375302086)100:0.0170043992,Volvox carteri f. nagariensis  
@Volvox\_Volvocaceae\_Chlamydomonadales\_Chlorophyceae\_Chlorophyta\_Viridiplantae\_Eukaryota  
XP\_002950455:0.0293213789)100:0.1069165101)100:0.2366222472,Galdieria sulphuraria  
@Galdieria\_Cyanidiaceae\_Cyanidiales\_Bangiophyceae\_Rhodophyta\_Eukaryota  
XP\_005708279:0.3142130702)97:0.1269010294,Cyanidioschyzon merolae strain 10D  
@Cyanidioschyzon\_Cyanidiaceae\_Cyanidiales\_Bangiophyceae\_Rhodophyta\_Eukaryota  
XP\_005536240:0.4106928932)98:0.1275135482,(Gracilariopsis chorda  
@Gracilariopsis\_Gracilariaceae\_Gracilariales\_Rhodymeniophycidae\_Florideophyceae\_Rhodophyta\_Eukaryota  
PXF41280:0.0805346893,Chondrus crispus  
@Chondrus\_Gigartinaceae\_Gigartinales\_Rhodymeniophycidae\_Florideophyceae\_Rhodophyta\_Eukaryota  
XP\_005712277:0.1142702163)100:0.5705163940)100:0.2412167763)100:0.5780204087,(Capsaspora owczarzaki ATCC  
30864 @Capsaspora\_Ichthyosporea\_Eukaryota XP\_004366029:0.0000023575,Capsaspora owczarzaki ATCC 30864  
@Capsaspora\_Ichthyosporea\_Eukaryota  
KJE89728:0.0135875883)100:0.3916137017)99:0.2283105084)100:0.2424705610,((Artemidia motanka  
1610\_TRINITY\_DN17294\_c8\_g5\_i1:0.0893553446,((Namystynia karyoxenos  
1621\_TRINITY\_DN46753\_c0\_g1\_i1:0.0000025789,(Namystynia karyoxenos  
1621\_TRINITY\_DN46753\_c0\_g1\_i3:0.0164221334,Namystynia karyoxenos  
1621\_TRINITY\_DN46753\_c0\_g1\_i4:0.0000020027)89:0.0220656348)85:0.0140495432,Namystynia karyoxenos  
1621\_TRINITY\_DN46753\_c0\_g1\_i2:0.0114415135)100:0.0588496080)100:0.0715317049,Artemidia motanka  
1610\_TRINITY\_DN17294\_c8\_g7\_i1:0.0872784928)100:0.0633324660)97:0.0513058525)100:0.0865857645);
